# Supplementary material
Source: publisher figshare collection journal article supplement (https://acs.figshare.com/ndownloader/files/4504720)
Supplement: Supplementary file 1 [file 4504720]

## Supporting Information

### Hypoxia Activated Prodrugs: Substituent Effects on the Properties of Nitro *seco*-1,2,9,9a-Tetrahydrocyclopropa[*c*]benz[*e*]indol-4-one (nitroCBI) Prodrugs of DNA Minor Groove Alkylating Agents

Moana Tercel,<sup>\*</sup> Graham J. Atwell,<sup>†</sup> Shangjin Yang,<sup>†</sup> Ralph J. Stevenson,<sup>†</sup> K. Jane Botting,<sup>†</sup> Maruta Boyd,<sup>†</sup> Eileen Smith,<sup>†</sup> Robert F. Anderson,<sup>‡</sup> William A. Denny,<sup>†</sup> William R. Wilson,<sup>†</sup> Frederik B. Pruijn<sup>†</sup>

*Auckland Cancer Society Research Centre, Faculty of Medical and Health Sciences, and Department of Chemistry, The University of Auckland, Private Bag 92019, Auckland 1142, New Zealand*

### Contents

|                                                                                                                                                                        |     |
|------------------------------------------------------------------------------------------------------------------------------------------------------------------------|-----|
| Synthesis of all 7-, 8-, and 9-substituted nitroCBIs of Tables 1 and 2 and aminoCBIs of Table 3 (compounds <b>9-18</b> , <b>25-38</b> , <b>41-52</b> ).....            | S2  |
| Combustion analyses for new compounds.....                                                                                                                             | S46 |
| 2D NMR Spectra of <b>105</b> , <b>162</b> , <b>161</b> , <b>97</b> , <b>59</b> (EWG = 6-COMe), <b>92</b> , <b>119</b> , <b>144</b> .....                               | S50 |
| X-ray crystallographic data for <b>133</b> and <b>105</b> .....                                                                                                        | S54 |
| Figure S1. Relationship between one-electron reduction potential [ <i>E</i> (1)] and cytotoxicity (IC <sub>50</sub> ) for the nitroCBIs of Table 2. ....               | S65 |
| Figure S2. Relationship between hypoxic cytotoxicity ratio (HCR) in HT29 and one-electron reduction potential [ <i>E</i> (1)] for the compounds of Table 2 .....       | S65 |
| Figure S3. Correlation between cytotoxicity in HT29 and Skov3.....                                                                                                     | S66 |
| Figure S4. Comparison of hypoxic cytotoxicity and hypoxic selectivity of <b>28</b> , PR-104A ( <b>3</b> ), and tirapazamine ( <b>1</b> ) across a cell line panel..... | S67 |
| Figure S5. MS and UV-visible spectroscopy characterisation of B and its major S9 metabolites under oxic and hypoxic incubation conditions. ....                        | S68 |
| References.....                                                                                                                                                        | S69 |

**Synthesis of all 7-, 8-, and 9-substituted nitroCBIs of Tables 1 and 2 and aminoCBIs of Table 3 (compounds 9-18, 25-38, 41-52).**

**Synthesis of 9 and 25.**

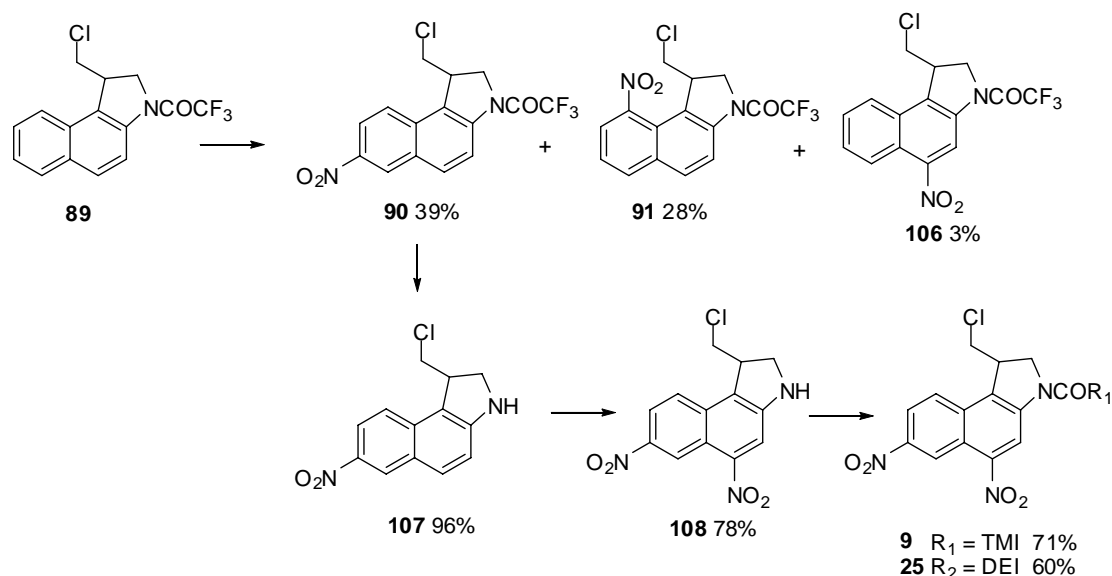

**1-(Chloromethyl)-3-(trifluoroacetyl)-7-nitro-1,2-dihydro-3H-benzo[e]indole (90).** A stirred solution of **89** (5.24 g, 16.7 mmol) in dry  $\text{CH}_2\text{Cl}_2$  (70 mL) was treated dropwise at 10 °C with  $\text{fHNO}_3$  (2.0 mL, 48 mmol) and then warmed to room temperature for 5 min. The mixture was diluted with  $\text{CH}_2\text{Cl}_2$  (100 mL) and the resulting solution was washed with water, dried, filtered through a column of silica gel, then concentrated to 25 mL and diluted with EtOAc (25 mL). Following refrigeration the precipitate was collected and washed with EtOAc to give **90** (2.31 g, 39%) as a pale yellow solid: mp ( $\text{CH}_2\text{Cl}_2/\text{iPr}_2\text{O}$ ) 213-214 °C;  $^1\text{H}$  NMR [ $(\text{CD}_3)_2\text{SO}$ ]  $\delta$  9.06 (s, 1 H), 8.48 (d,  $J = 9.0$  Hz, 1 H), 8.36 (d,  $J = 9.1$  Hz, 1 H), 8.33-8.25 (m, 2 H), 4.67-4.51 (m, 2 H), 4.46 (br d,  $J = 10.6$  Hz, 1 H), 4.17 (dd,  $J = 11.3, 3.0$  Hz, 1 H), 4.07 (dd,  $J = 11.3, 5.5$  Hz, 1 H). Anal. ( $\text{C}_{15}\text{H}_{10}\text{ClF}_3\text{N}_2\text{O}_3$ ) C, H, N.

The mother liquor from the above crystallization was evaporated under reduced pressure, and the residue was chromatographed on silica gel. Elution with  $\text{CH}_2\text{Cl}_2$ /petroleum ether (1:1) gave 1-(chloromethyl)-3-(trifluoroacetyl)-9-nitro-1,2-dihydro-3H-benzo[e]indole (**91**) (1.67 g, 28%) as a pale yellow solid: mp (EtOAc/petroleum ether) 139-140 °C;  $^1\text{H}$  NMR [ $(\text{CD}_3)_2\text{SO}$ ]  $\delta$  8.58 (d,  $J = 9.1$  Hz, 1 H), 8.39 (d,  $J = 8.1$  Hz, 1 H), 8.30 (d,  $J = 9.1$  Hz, 1 H), 8.20 (dd,  $J = 7.6, 0.9$  Hz, 1 H), 7.69 (t,  $J = 7.9$  Hz, 1 H), 4.60 (dd,  $J = 11.1, 8.7$  Hz, 1 H), 4.33 (d,  $J = 11.3$  Hz, 1 H), 4.03-3.90 (m, 1 H), 3.73 (dd,  $J = 11.4, 3.3$  Hz, 1 H), 3.51 (dd,  $J = 11.4, 6.8$  Hz, 1 H). Anal. ( $\text{C}_{15}\text{H}_{10}\text{ClF}_3\text{N}_2\text{O}_3$ ) C, H, N.

Further elution gave 1-(chloromethyl)-3-(trifluoroacetyl)-5-nitro-1,2-dihydro-3H-benzo[e]indole (**106**)<sup>1</sup> (165 mg, 3%).

**1-(Chloromethyl)-7-nitro-1,2-dihydro-3H-benzo[e]indole (107).** A solution of **90** (1.00 g, 2.79 mmol) in dioxane (30 mL) was treated with a solution of  $\text{Cs}_2\text{CO}_3$  (3.26 g, 10 mmol) in water (3 mL) and MeOH (17 mL), and the mixture was stirred vigorously at room temperature for 15 min. The resulting solution was treated with AcOH (1.2 mL), then concentrated to a small volume under reduced pressure and partitioned between water and  $\text{CH}_2\text{Cl}_2$ . The organic phase was washed with water ( $\times 2$ ),

dried, and filtered through a column of silica gel. Evaporation and trituration with petroleum ether/*i*Pr<sub>2</sub>O gave **107** (702 mg, 96%) as an orange-red solid: mp (CH<sub>2</sub>Cl<sub>2</sub>/petroleum ether) 121-122 °C; <sup>1</sup>H NMR [(CD<sub>3</sub>)<sub>2</sub>SO] δ 8.76 (d, *J* = 2.2 Hz, 1 H), 8.05 (dd, *J* = 9.3, 2.3 Hz, 1 H), 7.97 (d, *J* = 8.7 Hz, 1 H), 7.76 (d, *J* = 9.3 Hz, 1 H), 7.09 (d, *J* = 8.7 Hz, 1 H), 6.79 (s, 1 H), 4.17-4.04 (m, 1 H), 3.95-3.78 (m, 2 H), 3.76-3.63 (m, 2 H). Anal. (C<sub>13</sub>H<sub>11</sub>ClN<sub>2</sub>O<sub>2</sub>) C, H, N.

**1-(Chloromethyl)-5,7-dinitro-1,2-dihydro-3*H*-benzo[*e*]indole (108).** A stirred solution of **107** (901 mg, 3.43 mmol) in cH<sub>2</sub>SO<sub>4</sub> (10 mL) was cooled to -5 °C and treated with powdered KNO<sub>3</sub> (520 mg, 5.14 mmol). The mixture was stirred at 0 °C for a further 15 min, then poured into ice-water and the solid was collected. This was dissolved in warm EtOAc, and the solution was diluted with an equal volume of CH<sub>2</sub>Cl<sub>2</sub> and filtered through a short column of silica gel. The eluate was concentrated to a small volume and MeOH was added to precipitate **108** (824 mg, 78%) as a red solid: mp (EtOAc/*i*Pr<sub>2</sub>O) 239-240 °C; <sup>1</sup>H NMR [(CD<sub>3</sub>)<sub>2</sub>SO] δ 9.06 (d, *J* = 2.3 Hz, 1 H), 8.17 (dd, *J* = 9.3, 2.2 Hz, 1 H), 8.00 (d, *J* = 9.3 Hz, 1 H), 7.83 (s, 1 H), 7.14 (s, 1 H), 4.33-4.24 (m, 1 H), 3.98-3.88 (m, 2 H), 3.84 (dd, *J* = 11.1, 7.9 Hz, 1 H), 3.77 (dd, *J* = 10.7, 3.2 Hz, 1 H). Anal. (C<sub>13</sub>H<sub>10</sub>ClN<sub>3</sub>O<sub>4</sub>) C, H, N, Cl.

**1-(Chloromethyl)-5,7-dinitro-(5,6,7-trimethoxyindol-2-carbonyl)-1,2-dihydro-3*H*-benzo[*e*]indole (9).** A suspension of 5,6,7-trimethoxyindole-2-carboxylic acid (122 mg, 0.49 mmol) in dry CH<sub>2</sub>Cl<sub>2</sub> (10 mL) was treated with oxalyl chloride (0.13 mL, 1.49 mmol) followed by DMF (10 μL). The mixture was stirred at room temperature for 15 min, then evaporated under reduced pressure and azeotroped dry with benzene. The resulting acid chloride was cooled to -5 °C and treated with an ice-cold solution of amine **108** (100 mg, 0.33 mmol) in dry pyridine (2 mL) containing DMAP (5 mg). The stirred mixture was warmed to room temperature for 30 min, then poured into dilute aqueous KHCO<sub>3</sub>. The precipitate was collected, purified by chromatography on silica gel eluting with CH<sub>2</sub>Cl<sub>2</sub>/EtOAc (19:1), then crystallised from CH<sub>2</sub>Cl<sub>2</sub>/EtOAc to give **9** (124 mg, 71%) as an orange solid: mp 251-252 °C; <sup>1</sup>H NMR [(CD<sub>3</sub>)<sub>2</sub>SO] δ 11.66 (d, *J* = 1.6 Hz, 1 H), 9.33 (d, *J* = 2.2 Hz, 1 H), 9.31 (s, 1 H), 8.45 (d, *J* = 9.3 Hz, 1 H), 8.39 (dd, *J* = 9.3, 2.2 Hz, 1 H), 7.20 (d, *J* = 2.2 Hz, 1 H), 6.97 (s, 1 H), 4.95 (dd, *J* = 11.1, 10.3 Hz, 1 H), 4.72-4.58 (m, 2 H), 4.18-4.06 (m, 2 H), 3.94 (s, 3 H), 3.83 (s, 3 H), 3.81 (s, 3 H). HRMS (FAB) calcd. for C<sub>25</sub>H<sub>21</sub><sup>35</sup>ClN<sub>4</sub>O<sub>8</sub> (M<sup>+</sup>) *m/z* 540.1048, found 540.1043. Anal. (C<sub>25</sub>H<sub>21</sub>ClN<sub>4</sub>O<sub>8</sub>) C, H, N.

**1-(Chloromethyl)-3-{5-[2-(dimethylamino)ethoxy]indol-2-carbonyl}-5,7-dinitro-1,2-dihydro-3*H*-benzo[*e*]indole (25).** A mixture of amine **108** (100 mg, 0.33 mmol), 5-[2-(dimethylamino)ethoxy]indole-2-carboxylic acid hydrochloride (111 mg, 0.39 mmol), EDCI (249 mg, 1.30 mmol) and anhydrous TsOH (4.0 mg, 0.02 mmol) in dry DMA (8 mL) was stirred at room temperature under N<sub>2</sub> for 6 h, then poured into dilute aqueous NH<sub>3</sub>. The basic mixture was stirred for 1 h, then the precipitate was collected and dissolved in EtOAc (300 mL) at room temperature. The solution was washed with water, dried, and then concentrated to 10 mL under reduced pressure below 30 °C to give crude **25**. Treatment of a suspension of the free base in MeOH with HCl(g)/EtOAc, followed by crystallization from MeOH/Me<sub>2</sub>CO/EtOAc gave **25**·HCl (114 mg, 60%) as a yellow solid: mp 263-264 °C; <sup>1</sup>H NMR [(CD<sub>3</sub>)<sub>2</sub>SO] δ 11.88 (s, 1 H), 10.15 (br s, 1 H), 9.36 (s, 1 H), 9.34 (d, *J* = 2.2 Hz, 1 H), 8.48 (d, *J* = 9.3 Hz, 1 H), 8.41 (dd, *J* = 9.3, 2.2 Hz, 1 H), 7.46 (d, *J* = 8.9 Hz, 1 H), 7.26 (s, 2

H), 7.03 (dd,  $J = 8.9, 2.3$  Hz, 1 H), 5.00 (t,  $J = 10.5$  Hz, 1 H), 4.78-4.65 (m, 2 H), 4.36 (t,  $J = 4.9$  Hz, 2 H), 4.22-4.09 (m, 2 H), 3.52 (t,  $J = 4.5$  Hz, 2 H), 2.80 (s, 6 H). Anal. ( $\text{C}_{26}\text{H}_{24}\text{ClN}_5\text{O}_6 \cdot \text{HCl}$ ) C, H, N.

# Synthesis of 10 and 26.

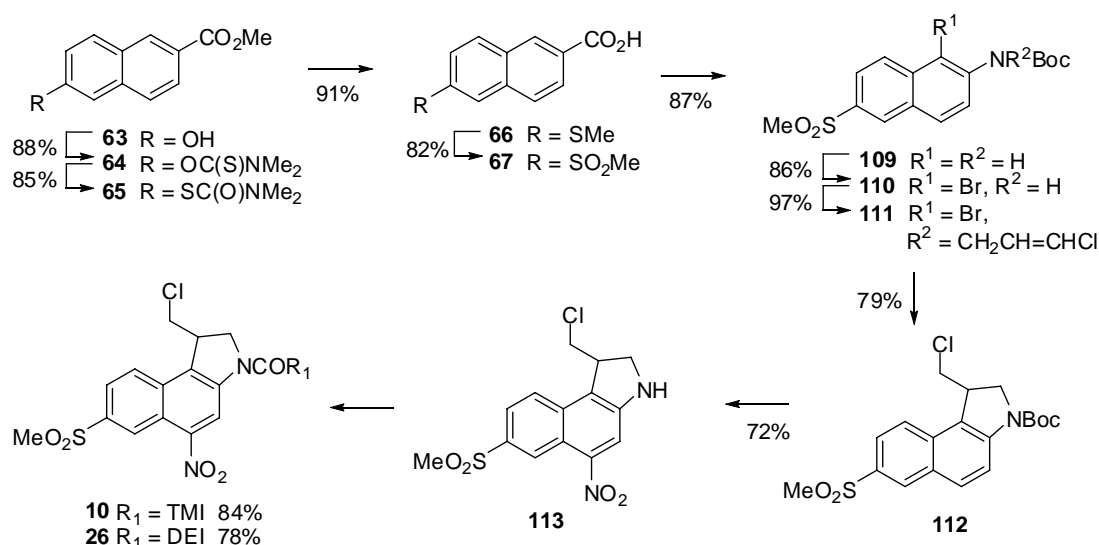

**Methyl 6-[[[(dimethylamino)carbothioyl]oxy]-2-naphthoate (64).** A mixture of methyl 6-hydroxy-2-naphthoate<sup>2</sup> (**63**) (5.95 g, 29.4 mmol), DABCO (1,4-diazabicyclo[2,2,2]octane) (6.61 g, 58.9 mmol) and dimethylthiocarbamoyl chloride (5.46 g, 44.2 mmol) in dry DMF (40 mL) was stirred at room temperature for 8 h. The precipitated solid was collected, washed with water and dissolved in CH<sub>2</sub>Cl<sub>2</sub>. The solution was filtered through a column of silica gel and the product was triturated with i-Pr<sub>2</sub>O and recrystallized from CH<sub>2</sub>Cl<sub>2</sub>/hexane to give **64** (7.47 g, 88%) as a white solid: mp 144-147 °C; <sup>1</sup>H NMR [(CD<sub>3</sub>)<sub>2</sub>SO] δ 8.66 (s, 1 H), 8.16 (d, *J* = 9.0 Hz, 1 H), 8.03 (d, *J* = 8.7 Hz, 1 H), 8.00 (dd, *J* = 8.6, 1.5 Hz, 1 H), 7.70 (d, *J* = 2.3 Hz, 1 H), 7.38 (dd, *J* = 8.9, 2.3 Hz, 1 H), 3.93 (s, 3 H), 3.40 (s, 3 H), 3.38 (s, 3 H). Anal. (C<sub>15</sub>H<sub>15</sub>NO<sub>3</sub>S) C, H, N.

**Methyl 6-[[[(dimethylamino)carbonyl]sulfanyl]-2-naphthoate (65).** Thiocarbamate **64** (8.10g, 28 mmol) was heated under N<sub>2</sub> at 225 °C for 3 h. The cooled mixture was purified by chromatography on silica gel, eluting with CH<sub>2</sub>Cl<sub>2</sub>/EtOAc, followed by trituration with i-Pr<sub>2</sub>O to give **65** (6.91 g, 85%) as a white solid: mp (CH<sub>2</sub>Cl<sub>2</sub>/petroleum ether) 130-132 °C; <sup>1</sup>H NMR [(CD<sub>3</sub>)<sub>2</sub>SO] δ 8.67 (s, 1 H), 8.17 (d, *J* = 0.8 Hz, 1 H), 8.16 (d, *J* = 8.8 Hz, 1 H), 8.07 (d, *J* = 8.7 Hz, 1 H), 8.03 (dd, *J* = 8.5, 1.6 Hz, 1 H), 7.60 (dd, *J* = 8.5, 1.8 Hz, 1 H), 3.93 (s, 3 H), 3.09 (br s, 3 H), 2.97 (br s, 3 H). Anal. (C<sub>15</sub>H<sub>15</sub>NO<sub>3</sub>S) C, H, N.

**6-(Methylsulfanyl)-2-naphthoic acid (66).** A suspension of **65** (6.36 g, 22 mmol) in a mixture of aq KOH (5N, 340 mL, 1.7 mol) and MeOH (205 mL) was stirred at reflux for 3 h, then cooled to 5 °C and treated dropwise with Me<sub>2</sub>SO<sub>4</sub> (26 mL, 275 mmol). After stirring at room temperature for a further 4 h the mixture was concentrated to half volume, acidified with dilute aq HCl, and the precipitated product was crystallized from EtOAc/hexane to give **66** (4.39 g, 91%) as a white solid: mp (MeOH) 231-233 °C; <sup>1</sup>H NMR [(CD<sub>3</sub>)<sub>2</sub>SO] δ (CO<sub>2</sub>H not observed) 8.53 (s, 1 H), 8.01 (d, *J* = 8.9 Hz, 1 H), 7.96 (dd, *J* = 8.6, 1.7 Hz, 1 H), 7.90 (d, *J* = 8.7 Hz, 1 H), 7.77 (d, *J* = 1.7 Hz, 1 H), 7.47 (dd, *J* = 8.7, 1.9 Hz, 1 H), 2.61 (s, 3 H). Anal. (C<sub>12</sub>H<sub>10</sub>O<sub>2</sub>S) C, H.

**6-(Methylsulfonyl)-2-naphthoic acid (67).** A mixture of **66** (4.24 g, 19.4 mmol) and NaBO<sub>3</sub>·4H<sub>2</sub>O (20.0 g, 130 mmol) in AcOH (150 mL) was stirred at 55 °C for 2 h. Additional

NaBO<sub>3</sub>·4H<sub>2</sub>O (5.4 g, 35 mmol) was added and the mixture was stirred at 55 °C for a further 2 h, then diluted with water (1 L). The precipitated solid was collected, washed with water, and recrystallized from MeOH then DMF/H<sub>2</sub>O to give **67** (3.98 g, 82%) as a white solid: mp 301-304 °C; <sup>1</sup>H NMR [(CD<sub>3</sub>)<sub>2</sub>SO] δ (CO<sub>2</sub>H not observed) 8.74 (s, 1 H), 8.66 (s, 1 H), 8.39 (d, *J* = 8.8 Hz, 1 H), 8.30 (d, *J* = 8.8 Hz, 1 H), 8.13 (dd, *J* = 8.6, 1.7 Hz, 1 H), 8.03 (dd, *J* = 8.7, 1.9 Hz, 1 H), 3.32 (s, 3 H). Anal. (C<sub>12</sub>H<sub>10</sub>O<sub>4</sub>S) C, H.

**tert-Butyl 6-(methylsulfonyl)-2-naphthylcarbamate (109).** A suspension of acid **67** (4.08 g, 16.30 mmol) in dry t-BuOH (70 mL) containing powdered molecular sieves (2 g) was treated with Et<sub>3</sub>N (2.73 mL, 19.59 mmol) and stirred under N<sub>2</sub> at room temperature for 30 min. DPPA (3.87 mL, 17.96 mmol) was added and the mixture was stirred at reflux for 6 h, then concentrated to a small volume under reduced pressure and poured into dilute aqueous NaHCO<sub>3</sub>. The resulting solid was purified by chromatography on silica gel, eluting with CH<sub>2</sub>Cl<sub>2</sub>, to give **109** (4.57 g, 87%) as a white solid: mp (EtOAc/hexane) 203-204 °C; <sup>1</sup>H NMR [(CD<sub>3</sub>)<sub>2</sub>SO] δ 9.81 (s, 1 H), 8.44 (d, *J* = 1.2 Hz, 1 H), 8.26 (s, 1 H), 8.08 (d, *J* = 9.0 Hz, 1 H), 8.01 (d, *J* = 8.7 Hz, 1 H), 7.84 (dd, *J* = 8.7, 1.8 Hz, 1 H), 7.66 (dd, *J* = 8.9, 2.0 Hz, 1 H), 3.25 (s, 3 H), 1.52 (s, 9 H). Anal. (C<sub>16</sub>H<sub>19</sub>NO<sub>4</sub>S) C, H, N.

**tert-Butyl 1-bromo-6-(methylsulfonyl)-2-naphthylcarbamate (110).** A mixture of **109** (4.47 g, 13.91 mmol) and NBS (2.72 g, 15.28 mmol) in MeCN (80 mL) was stirred at reflux for 3 h, then concentrated under reduced pressure. The residue was dissolved in CH<sub>2</sub>Cl<sub>2</sub> and the solution was washed with 10% aq Na<sub>2</sub>SO<sub>3</sub> and water, dried, and concentrated under reduced pressure. The residue was purified by chromatography on silica gel, eluting with CH<sub>2</sub>Cl<sub>2</sub>, to give **110** (4.79 g, 86%) as a white solid: mp (MeOH) 190 °C; <sup>1</sup>H NMR [(CD<sub>3</sub>)<sub>2</sub>SO] δ 8.95 (s, 1 H), 8.61 (d, *J* = 1.8 Hz, 1 H), 8.36 (d, *J* = 9.0 Hz, 1 H), 8.22 (d, *J* = 8.8 Hz, 1 H), 8.08 (dd, *J* = 9.0, 1.9 Hz, 1 H), 7.96 (d, *J* = 8.9 Hz, 1 H), 3.25 (after D<sub>2</sub>O exchange, s, 3 H), 1.50 (s, 9 H). Anal. (C<sub>16</sub>H<sub>18</sub>BrNO<sub>4</sub>S) C, H, N.

**tert-Butyl 1-bromo-6-(methylsulfonyl)-2-naphthyl(3-chloro-2-propen-1-yl)carbamate (111).** A stirred suspension of **110** (4.70 g, 11.74 mmol) in dry DMF (40 mL) was treated portionwise at 0 °C with NaH (564 mg, 60% in oil, 14.10 mmol). The mixture was warmed to room temperature for 1 h then cooled to 0 °C and treated with 1,3-dichloropropene (3.4 mL, 37 mmol, mixed isomers). The mixture was stirred at room temperature for a further 6 h, then diluted with 10% aqueous NaCl and extracted with EtOAc (×2). The combined organic layers were washed with water (×2), dried, and concentrated to dryness under reduced pressure at 100 °C. The residue was chromatographed on silica gel, eluting with CH<sub>2</sub>Cl<sub>2</sub>/EtOAc (9:1) to give **111** (5.41 g, 97%) as a foam; <sup>1</sup>H NMR [(CD<sub>3</sub>)<sub>2</sub>SO] (mixture of rotamers and E and Z forms) δ 8.73-8.69 (m, 1 H), 8.46 (d, *J* = 9.0 Hz, 1 H), 8.30, 8.29 (2 d, *J* = 8.6 Hz, 1 H), 8.14 (dd, *J* = 9.0, 1.8 Hz, 1 H), 7.71, 7.68 (2 d, *J* = 8.6 Hz, 1 H), 6.43-6.28 (m, 1 H), 6.19-6.01 (m, 1 H), 4.59-4.48, 4.44-4.23, 4.19-4.05 (3 m, 2 H), 3.27 (after D<sub>2</sub>O exchange, s, 3 H), 1.50, 1.26 (2 s, 9 H). HRMS (FAB) calcd. for C<sub>19</sub>H<sub>22</sub><sup>79</sup>Br<sup>35</sup>ClNO<sub>4</sub>S (MH<sup>+</sup>) *m/z* 474.0141, found 474.0142.

**tert-Butyl 1-(chloromethyl)-7-(methylsulfonyl)-1,2-dihydro-3H-benzo[*e*]indole 3-carboxylate (112).** A mixture of **111** (5.38 g, 11.33 mmol), Bu<sub>3</sub>SnH (3.05 mL, 11.34 mmol) and AIBN (0.25 g, 1.5 mmol) in dry benzene (80 mL) under N<sub>2</sub> was stirred at reflux for 2 h, then concentrated under reduced pressure. The residue was dissolved in CH<sub>2</sub>Cl<sub>2</sub> and the solution was diluted with excess

hexane and refrigerated. The precipitated semisolid was purified by chromatography on silica gel, eluting with CH<sub>2</sub>Cl<sub>2</sub>/EtOAc (19:1), to give **112** (3.53 g, 79%) as a white solid: mp (iPr<sub>2</sub>O) 125-126 °C; <sup>1</sup>H NMR [(CD<sub>3</sub>)<sub>2</sub>SO] δ 8.54 (d, *J* = 1.8 Hz, 1 H), 8.25-8.05 (m, 3 H), 7.91 (dd, *J* = 8.9, 1.9 Hz, 1 H), 4.36-4.27 (m, 1 H), 4.23 (t, *J* = 10.5 Hz, 1 H), 4.10 (dd, *J* = 11.4, 2.9 Hz, 1 H), 4.05 (dd, *J* = 11.1, 3.2 Hz, 1 H), 3.94 (dd, *J* = 11.1, 6.7 Hz, 1 H), 3.21 (after D<sub>2</sub>O exchange, s, 3 H), 1.56 (s, 9 H). Anal. (C<sub>19</sub>H<sub>22</sub>ClNO<sub>4</sub>S) C, H, N.

**1-(Chloromethyl)-7-(methylsulfonyl)-5-nitro-1,2-dihydro-3H-benzo[*e*]indole (113).**

Powdered **112** (1.50 g, 3.79 mmol) was added to stirred cH<sub>2</sub>SO<sub>4</sub> (16 mL) at 0 °C, and the mixture was warmed to room temperature for 30 min. The resulting solution was cooled to -5 °C and treated dropwise with a solution of KNO<sub>3</sub> (421 mg, 4.16 mmol) in cH<sub>2</sub>SO<sub>4</sub> (3 mL). The mixture was stirred at 0 °C for a further 10 min then poured into ice/water and neutralized with aqueous NH<sub>3</sub>. The resulting solid was purified by chromatography on silica gel, eluting with CH<sub>2</sub>Cl<sub>2</sub>, to give **113** (926 mg, 72%) as a red solid: mp (EtOAc) 199-200 °C; <sup>1</sup>H NMR [(CD<sub>3</sub>)<sub>2</sub>SO] δ 8.68 (d, *J* = 1.6 Hz, 1 H), 8.06 (dd, *J* = 8.9, 0.4 Hz, 1 H), 7.90 (dd, *J* = 8.9, 1.8 Hz, 1 H), 7.79 (s, 1 H), 6.83 (s, 1 H), 4.31-4.23 (m, 1 H), 3.95-3.86 (m, 2 H), 3.82 (dd, *J* = 11.1, 8.1 Hz, 1 H), 3.76 (dd, *J* = 10.1, 3.1 Hz, 1 H), 3.25 (s, 3 H). Anal. (C<sub>14</sub>H<sub>13</sub>ClN<sub>2</sub>O<sub>4</sub>S) C, H, N, Cl.

**1-(Chloromethyl)-7-(methylsulfonyl)-5-nitro-3-(5,6,7-trimethoxyindol-2-carbonyl)-1,2-dihydro-3H-benzo[*e*]indole (10).** A mixture of amine **113** (250 mg, 0.73 mmol), 5,6,7-trimethoxyindole-2-carboxylic acid (221 mg, 0.88 mmol), EDCI (563 mg, 2.94 mmol) and anhydrous TsOH (100 mg, 0.58 mmol) in dry DMA (8 mL) was stirred at room temperature for 4 h, then poured into dilute aqueous KHCO<sub>3</sub>. The precipitate was collected and crystallized from DMF/H<sub>2</sub>O to give **10** (353 mg, 84%) as a yellow solid: mp 296-297 °C (dec.); <sup>1</sup>H NMR [(CD<sub>3</sub>)<sub>2</sub>SO] δ 11.62 (s, 1 H), 9.27 (s, 1 H), 8.98 (d, *J* = 1.7 Hz, 1 H), 8.48 (d, *J* = 8.9 Hz, 1 H), 8.15 (dd, *J* = 8.9, 1.8 Hz, 1 H), 7.21 (d, *J* = 2.2 Hz, 1 H), 6.99 (s, 1 H), 4.95 (t, *J* = 10.7 Hz, 1 H), 4.70-4.61 (m, 2 H), 4.20-4.06 (m, 2 H), 3.94 (s, 3 H), 3.83 (s, 3 H), 3.81 (s, 3 H), 3.28 (s, 3 H). Anal. (C<sub>26</sub>H<sub>24</sub>ClN<sub>3</sub>O<sub>8</sub>S·½H<sub>2</sub>O) C, H, N.

**1-(Chloromethyl)-3-{5-[2-(dimethylamino)ethoxy]indol-2-carbonyl}-7-(methylsulfonyl)-5-nitro-1,2-dihydro-3H-benzo[*e*]indole (26).** A mixture of amine **113** (350 mg, 1.03 mmol), 5-[2-(dimethylamino)ethoxy]indol-2-carboxylic acid hydrochloride (351 mg, 1.23 mmol), EDCI (788 mg, 4.11 mmol) and anhydrous TsOH (140 mg, 0.81 mmol) in dry DMF (20 mL) was stirred under N<sub>2</sub> at room temperature for 6 h, then poured into dilute aq NH<sub>3</sub>. The precipitated solid was collected, dissolved in CH<sub>2</sub>Cl<sub>2</sub>, and the dried solution was diluted with EtOAc and concentrated under reduced pressure below 25 °C to a small volume to give crude **26**. Treatment of a suspension of the free base in MeOH with HCl(g)/EtOAc/hexane followed by crystallization from MeOH/EtOAc gave **26**·HCl (484 mg, 78%) as a yellow solid: mp 250-252 °C; <sup>1</sup>H NMR [(CD<sub>3</sub>)<sub>2</sub>SO] δ 11.83 (d, *J* = 1.7 Hz, 1 H), 10.19 (br s, 1 H), 9.32 (s, 1 H), 8.98 (d, *J* = 1.7 Hz, 1 H), 8.50 (d, *J* = 8.9 Hz, 1 H), 8.17 (dd, *J* = 8.9, 1.8 Hz, 1 H), 7.47 (d, *J* = 8.9 Hz, 1 H), 7.27 (d, *J* = 2.3 Hz, 1 H), 7.25 (d, *J* = 1.7 Hz, 1 H), 7.04 (dd, *J* = 8.9, 2.4 Hz, 1 H), 5.00 (t, *J* = 10.1 Hz, 1 H), 4.77-4.65 (m, 2 H), 4.37 (t, *J* = 5.0 Hz, 2 H), 4.20-4.09 (m, 2 H), 3.51 (br s, 2 H), 3.36 (s, 3 H), 2.86 (s, 6 H). Anal. (C<sub>27</sub>H<sub>27</sub>ClN<sub>4</sub>O<sub>6</sub>S·HCl) C, H, N.

# Synthesis of 11 and 27.

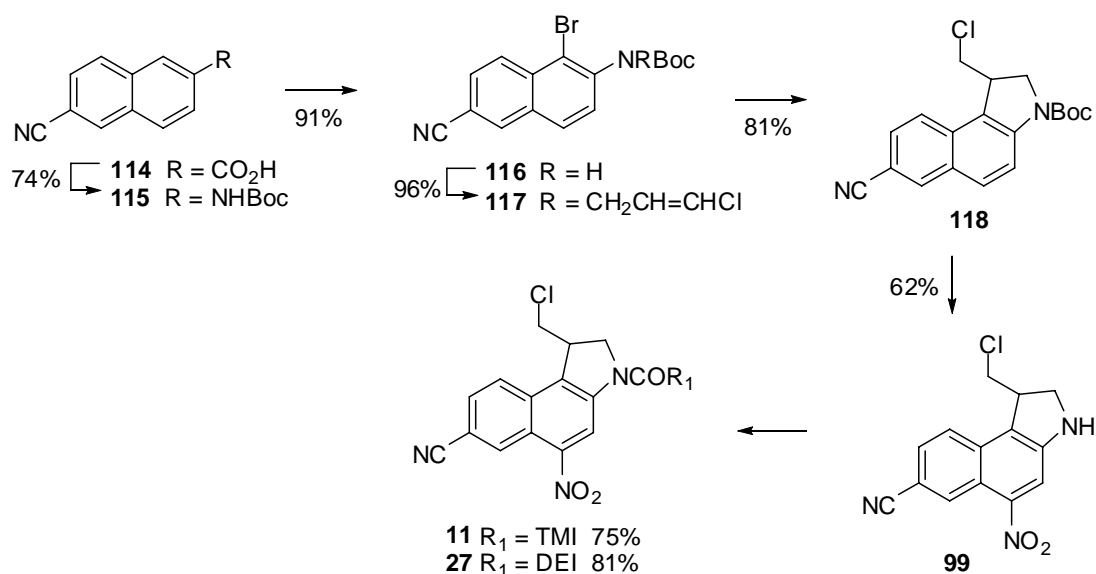

**tert-Butyl 6-cyano-2-naphthylcarbamate (115).** A suspension of 6-cyano-2-naphthoic acid<sup>3</sup> (**114**) (4.62 g, 23.4 mmol) in dry t-BuOH (120 mL) containing powdered molecular sieves (2 g) was treated with Et<sub>3</sub>N (3.91 mL, 28.1 mmol) and the mixture was stirred at room temperature under N<sub>2</sub> for 30 min. DPPA (5.55 mL, 25.8 mmol) was added, and the mixture was stirred at reflux for 6 h, then concentrated to half volume and poured into dilute aq NaHCO<sub>3</sub>. The resulting solid was purified by chromatography on silica gel, eluting with CH<sub>2</sub>Cl<sub>2</sub>, to give **115** (4.68 g, 74%): mp (MeOH/H<sub>2</sub>O) 135-136 °C; <sup>1</sup>H NMR [(CD<sub>3</sub>)<sub>2</sub>SO] δ 9.85 (s, 1 H), 8.42 (d, *J* = 0.9 Hz, 1 H), 8.23 (d, *J* = 1.0 Hz, 1 H), 7.95 (d, *J* = 8.7 Hz, 2 H), 7.68 (dd, *J* = 8.5, 1.6 Hz, 1 H), 7.64 (dd, *J* = 9.0, 2.0 Hz, 1 H), 1.52 (s, 9 H). Anal. (C<sub>16</sub>H<sub>16</sub>N<sub>2</sub>O<sub>2</sub>) C, H, N.

**tert-Butyl 1-bromo-6-cyano-2-naphthylcarbamate (116).** A solution of **115** (4.48 g, 18 mmol) and NBS (3.85 g, 21.6 mmol) in MeCN (80 mL) was stirred at reflux for 1 h, then concentrated under reduced pressure. The residue was dissolved in CH<sub>2</sub>Cl<sub>2</sub>, washed with 10% aqueous Na<sub>2</sub>SO<sub>3</sub>, water, dried, and concentrated under reduced pressure. The residue was purified by chromatography on silica gel, eluting with CH<sub>2</sub>Cl<sub>2</sub>, to give **116** (5.69 g, 91%): mp (iPr<sub>2</sub>O/hexane) 164-166 °C; <sup>1</sup>H NMR [(CD<sub>3</sub>)<sub>2</sub>SO] δ 9.01 (s, 1 H), 8.63 (d, *J* = 1.5 Hz, 1 H), 8.27 (d, *J* = 9.0 Hz, 1 H), 8.07 (d, *J* = 9.0 Hz, 1 H), 7.94 (d, *J* = 8.9 Hz, 1 H), 7.93 (dd, *J* = 8.9, 1.8 Hz, 1 H), 1.50 (s, 9 H). Anal. (C<sub>16</sub>H<sub>15</sub>BrN<sub>2</sub>O<sub>2</sub>) C, H, N, Br.

**tert-Butyl 1-bromo-6-cyano-2-naphthyl(3-chloro-2-propenyl)carbamate (117).** A stirred solution of **116** (5.78 g, 16.6 mmol) in dry DMF (50 mL) was treated at 0 °C with NaH (0.80 g, 20.0 mmol, 60% in oil). The resulting suspension was warmed to room temperature for 30 min, then cooled to 0 °C again and treated with 1,3-dichloropropene (4.8 mL, 52 mmol, mixed isomers). After stirring at room temperature for a further 6 h, the mixture was diluted with water and extracted with EtOAc (×3). The combined organic extracts were washed with water (×3), dried, and concentrated to dryness under high vacuum at 80 °C. The residue was chromatographed on silica gel, eluting with CH<sub>2</sub>Cl<sub>2</sub>, to give **117** (6.77 g, 96%) as a foam; <sup>1</sup>H NMR [(CD<sub>3</sub>)<sub>2</sub>SO] (mixture of rotamers and E and Z forms) δ 8.69 (s, 1 H),



8.35 (d,  $J$  = 8.8 Hz, 1 H), 8.13, 8.12 (2 d,  $J$  = 8.6 Hz, 1 H), 7.96 (d,  $J$  = 8.9 Hz, 1 H), 7.69, 7.63 (2d,  $J$  = 8.7 Hz, 1 H), 6.42-6.29 (m, 1 H), 6.17-5.99 (m, 1 H), 4.55-4.45, 4.40-4.19, 4.15-3.98 (3 m, 2 H), 1.48, 1.24 (2 s, 9 H). HRMS (FAB) calcd. for  $C_{19}H_{19}^{79}Br^{35}ClN_2O_2$  ( $MH^+$ )  $m/z$  421.0318, found 421.0306.

***tert*-Butyl 1-(chloromethyl)-7-cyano-1,2-dihydro-3*H*-benzo[*e*]indole-3-carboxylate (**118**).**

A solution of **117** (6.78 g, 16.1 mmol) in dry benzene (80 mL) was treated with  $Bu_3SnH$  (4.33 mL, 16.1 mmol), followed by AIBN (0.3 g, 1.8 mmol). The mixture was stirred at reflux under  $N_2$  for 2 h, then concentrated under reduced pressure, and the residue was chromatographed on silica gel. Elution with  $CH_2Cl_2$  gave an oil that was triturated with  $iPr_2O$ , to provide **118** contaminated with *tert*-butyl 7-cyano-1-methyl-1,2-dihydro-3*H*-benzo[*e*]indole-3-carboxylate. Two recrystallizations from  $CH_2Cl_2/iPr_2O$  gave pure **118** (4.49 g, 81%): mp 171-172 °C;  $^1H$  NMR [ $(CD_3)_2SO$ ]  $\delta$  8.55 (d,  $J$  = 1.4 Hz, 1 H), 8.18 (v br, 1 H), 8.07 (d,  $J$  = 8.7 Hz, 1 H), 8.01 (d,  $J$  = 8.9 Hz, 1 H), 7.75 (dd,  $J$  = 8.7, 1.7 Hz, 1 H), 4.34-4.25 (m, 1 H), 4.21 (t,  $J$  = 10.5 Hz, 1 H), 4.09 (dd,  $J$  = 11.3, 2.8 Hz, 1 H), 4.03 (dd,  $J$  = 11.1, 3.1 Hz, 1H), 3.93 (dd,  $J$  = 11.1, 6.7 Hz, 1 H), 1.55 (s, 9 H). Anal. ( $C_{19}H_{19}ClN_2O_2 \cdot \frac{1}{4}H_2O$ ) C, H, N.

**1-(Chloromethyl)-7-cyano-5-nitro-1,2-dihydro-3*H*-benzo[*e*]indole (**99**).** Powdered **118** (1.00 g, 2.9 mmol) was added portionwise to stirred  $cH_2SO_4$  (10 mL) at 0 °C, and the mixture was warmed to room temperature for 10 min. The resulting solution was cooled to -5 °C and treated dropwise with a solution of  $KNO_3$  (324 mg, 3.2 mmol) in  $cH_2SO_4$  (2 mL). After stirring for a further 5 min at 0 °C, the mixture was poured into ice/water and neutralized with dilute aq  $NH_3$ . The resulting solid was purified by chromatography on silica gel, eluting with  $CH_2Cl_2$ , followed by recrystallization from  $CH_2Cl_2$ , then EtOAc, to give **99** (522 mg, 62%) as a red solid: mp 237-238 °C;  $^1H$  NMR [ $(CD_3)_2SO$ ]  $\delta$  8.55 (d,  $J$  = 1.4 Hz, 1 H), 7.98 (d,  $J$  = 8.8 Hz, 1 H), 7.77 (s, 1 H), 7.74 (dd,  $J$  = 8.8, 1.5 Hz, 1 H), 6.87 (s, 1 H), 4.29-4.21 (m, 1 H), 3.94-3.85 (m, 2 H), 3.80 (dd,  $J$  = 11.1, 8.1 Hz, 1 H), 3.75 (dd,  $J$  = 10.6, 3.1 Hz, 1 H). Anal. ( $C_{14}H_{10}ClN_3O_2$ ) C, H, N, Cl.

**1-(Chloromethyl)-5-nitro-3-(5,6,7-trimethoxyindol-2-carbonyl)-1,2-dihydro-3*H*-benzo[*e*]indole-7-carbonitrile (**11**).** A suspension of 5,6,7-trimethoxyindole-2-carboxylic acid (79 mg, 0.31 mmol) in dry  $CH_2Cl_2$  (6 mL) was treated with oxalyl chloride (80  $\mu$ L, 0.92 mmol) followed by DMF (10  $\mu$ L). The mixture was stirred at room temperature for 30 min, then evaporated to dryness under reduced pressure and re-evaporated after addition of benzene. The resulting acid chloride was cooled to -5 °C and treated with an ice-cold solution of **99** (60 mg, 0.21 mmol) in dry pyridine (1.5 mL) containing DMAP (5 mg). The mixture was stirred at room temperature for 15 min, then poured into dilute aq  $KHCO_3$ . The resulting solid was purified by chromatography on silica gel, eluting with  $CH_2Cl_2$ /EtOAc (9:1), to give **11** (81 mg, 75%) as a yellow solid: mp ( $CH_2Cl_2$ /EtOAc) 257-258 °C;  $^1H$  NMR [ $(CD_3)_2SO$ ]  $\delta$  11.62 (s, 1 H), 9.23 (s, 1 H), 8.86 (d,  $J$  = 1.4 Hz, 1 H), 8.39 (d,  $J$  = 8.8 Hz, 1 H), 8.02 (dd,  $J$  = 8.8, 1.4 Hz, 1 H), 7.19 (d,  $J$  = 2.1 Hz, 1 H), 6.98 (s, 1 H), 4.93 (t,  $J$  = 10.6 Hz, 1 H), 4.69-4.59 (m, 2 H), 4.16-4.05 (m, 2 H), 3.94 (s, 3 H), 3.83 (s, 3 H), 3.81 (s, 3 H). Anal. ( $C_{26}H_{21}ClN_4O_6$ ) C, H, N.

**1-(Chloromethyl)-3-{5-[2-(dimethylamino)ethoxy]indol-2-carbonyl}-5-nitro-1,2-dihydro-3*H*-benzo[*e*]indole-7-carbonitrile (**27**).** A mixture of **99** (60 mg, 0.21 mmol), 5-[2-(dimethylamino)ethoxy]indole-2-carboxylic acid hydrochloride (71 mg, 0.25 mmol), EDCI (160 mg, 0.83 mmol) and anhydrous TsOH (25 mg, 0.15 mmol) in dry DMA (3 mL) was stirred under  $N_2$  at

room temperature for 6 h, then poured into dilute aq  $\text{NH}_3$ . The precipitated solid was collected, washed with water, and dissolved in  $\text{CH}_2\text{Cl}_2$ . The dried solution was concentrated under reduced pressure below  $25\text{ }^\circ\text{C}$  to a small volume and diluted with  $i\text{-Pr}_2\text{O}$  to give crude **27**. Treatment of a solution of the free base in  $\text{CH}_2\text{Cl}_2$  with  $\text{HCl(g)}/\text{EtOAc}/\text{hexane}$ , gave **27** $\cdot\text{HCl}$  (94 mg, 81%) as a yellow solid: mp (MeOH/EtOAc)  $>300\text{ }^\circ\text{C}$ ;  $^1\text{H NMR}$  [ $(\text{CD}_3)_2\text{SO}$ ]  $\delta$  11.86 (s, 1 H), 10.04 (v br s, 1 H), 9.31 (s, 1 H), 8.90 (d,  $J = 1.2\text{ Hz}$ , 1 H), 8.44 (d,  $J = 8.8\text{ Hz}$ , 1 H), 8.06 (dd,  $J = 8.8, 1.5\text{ Hz}$ , 1 H), 7.50 (d,  $J = 8.9\text{ Hz}$ , 1 H), 7.31 (d,  $J = 2.3\text{ Hz}$ , 1 H), 7.28 (d,  $J = 1.7\text{ Hz}$ , 1 H), 7.08 (dd,  $J = 8.9, 2.4\text{ Hz}$ , 1 H), 5.00 (t,  $J = 10.2\text{ Hz}$ , 1 H), 4.79-4.65 (m, 2 H), 4.39 (t,  $J = 5.1\text{ Hz}$ , 2 H), 4.21-4.10 (m, 2 H), 3.56 (t,  $J = 5.0\text{ Hz}$ , 2 H), 2.90 (s, 6 H). Anal. ( $\text{C}_{27}\text{H}_{24}\text{ClN}_5\text{O}_4\cdot\text{HCl}$ ) C, H, N.

### Synthesis of 12 and 28.

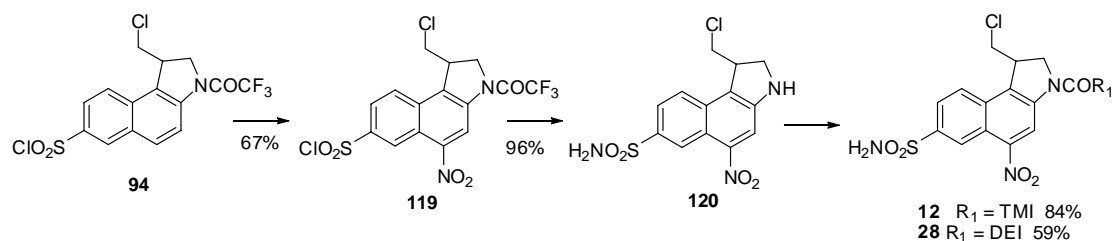

**1-(Chloromethyl)-5-nitro-3-(trifluoroacetyl)-1,2-dihydro-3H-benzo[*e*]indole-7-sulfonyl chloride (119).** A solution of **94** (250 mg, 0.63 mmol) in  $\text{CH}_2\text{SO}_4$  (10 mL) was nitrated with  $\text{KNO}_3$  (65 mg, 0.65 mmol) in  $\text{H}_2\text{SO}_4$  (5 mL) according to the general method, to give **119** (192 mg, 67%) as a red solid: mp (EtOAc/petroleum ether) 184–189 °C;  $^1\text{H}$  NMR [(CDCl<sub>3</sub>)]  $\delta$  9.34 (s, 1 H), 9.28 (d,  $J$  = 1.8 Hz, 1 H), 8.22 (dd,  $J$  = 9.0, 1.9 Hz, 1 H), 8.11 (d,  $J$  = 9.0 Hz, 1 H), 4.77–4.71 (m, 1 H), 4.58 (dd,  $J$  = 11.5, 8.8 Hz, 1 H), 4.42–4.33 (m, 1 H), 3.95 (dd,  $J$  = 11.7, 3.5 Hz, 1 H), 3.73 (dd,  $J$  = 11.7, 7.7 Hz, 1 H);  $^{13}\text{C}$  NMR  $\delta$  153.4 (q,  $J_{\text{C-F}}$  38 Hz), 153.0, 148.2, 147.0, 138.7, 133.2, 129.1, 126.7, 124.5, 122.0, 119.3, 115.9 (q,  $J_{\text{C-F}}$  288 Hz), 52.6, 47.3, 41.2. Anal. (C<sub>15</sub>H<sub>9</sub>ClF<sub>3</sub>N<sub>2</sub>O<sub>5</sub>S) C, H, N, Cl.

**1-(chloromethyl)-5-nitro-1,2-dihydro-3H-benzo[*e*]indole-7-sulfonamide (120).** Conc. aq  $\text{NH}_3$  (0.5 mL, 7.3 mmol) was added to a solution of **119** (299 mg, 0.65 mmol) in THF (10 mL) at 0 °C, and the ice bath was removed. The mixture was stirred for 7 min and then  $\text{Cs}_2\text{CO}_3$  (0.55 g, 1.7 mmol) and MeOH (4 mL) were added. After stirring for a further 15 min the mixture was diluted with brine and extracted with  $\text{CH}_2\text{Cl}_2$  (×3). The combined extracts were dried and evaporated to give **120** (214 mg, 96%) as an orange solid. A sample was triturated with EtOAc: mp 183–187 °C (dec.);  $^1\text{H}$  NMR [(CD<sub>3</sub>)<sub>2</sub>SO]  $\delta$  8.59 (d,  $J$  = 1.7 Hz, 1 H), 8.03 (d,  $J$  = 8.9 Hz, 1 H), 7.85 (dd,  $J$  = 8.9, 1.7 Hz, 1 H), 7.75 (s, 1 H), 7.42 (s, 2 H), 6.68 (s, 1 H), 4.28–4.21 (m, 1 H), 3.95–3.85 (m, 2 H), 3.81 (dd,  $J$  = 11.2, 8.3 Hz, 1 H), 3.73 (dd,  $J$  = 10.4, 3.0 Hz, 1 H). Anal. (C<sub>13</sub>H<sub>12</sub>ClN<sub>3</sub>O<sub>4</sub>S) C, H, N.

**1-(Chloromethyl)-5-nitro-3-(5,6,7-trimethoxyindol-2-carbonyl)-1,2-dihydro-3H-benzo[*e*]indole-7-sulfonamide (12).** A mixture of **120** (161 mg, 0.47 mmol), 5,6,7-trimethoxyindole-2-carboxylic acid (154 mg, 0.61 mmol), EDCI (361 mg, 1.88 mmol), and TsOH (16 mg, 0.09 mmol) in DMA (3 mL) was stirred at room temperature for 22 h and then cooled to 0 °C. Ice-cold aq  $\text{NaHCO}_3$  was added. The precipitated solid was filtered off and washed with aq  $\text{NaHCO}_3$ , water, and then dried in a vacuum desiccator. The crude product was triturated with EtOAc to give **12** (228 mg, 84%) as a yellow-brown solid: mp 280–285 °C (dec.);  $^1\text{H}$  NMR [(CD<sub>3</sub>)<sub>2</sub>SO]  $\delta$  11.60 (d,  $J$  = 1.7 Hz, 1 H), 9.23 (s, 1 H), 8.87 (d,  $J$  = 1.7 Hz, 1 H), 8.43 (d,  $J$  = 8.9 Hz, 1 H), 8.06 (dd,  $J$  = 8.9, 1.7 Hz, 1 H), 7.62 (s, 2 H), 7.19 (d,  $J$  = 2.2 Hz, 1 H), 6.98 (s, 1 H), 4.93 (dd,  $J$  = 11.1, 10.0 Hz, 1 H), 4.68–4.59 (m, 2 H), 4.17–4.09 (m, 2 H), 3.94 (s, 3 H), 3.83 (s, 3 H), 3.81 (s, 3 H). Anal. (C<sub>25</sub>H<sub>23</sub>ClN<sub>4</sub>O<sub>8</sub>S) C, H, N.

**1-(Chloromethyl)-3-[5-[2-(dimethylamino)ethoxy]indol-2-carbonyl]-5-nitro-1,2-dihydro-3H-benzo[*e*]indole-7-sulfonamide (28).** The amine **120** was reacted with 5-[2-(dimethylamino)ethoxy]indole-2-carboxylic acid as described in the general method. The product crystallized from  $\text{CH}_2\text{Cl}_2/\text{MeOH}$  to give **28**. This proved to be unstable as the free base and was immediately dissolved in  $\text{CH}_2\text{Cl}_2/\text{MeOH}$  (1:1, 20 mL) and treated with methanolic HCl (5 mL), followed by precipitation with petroleum ether. The solid was collected by filtration and air-dried to give

**28**·HCl (110 mg, 59%): mp >350 °C;  $^1\text{H}$  NMR  $[(\text{CD}_3)_2\text{SO}]$   $\delta$  11.82 (s, 1 H), 10.05 (br, 1 H), 9.28 (s, 1 H), 8.85 (d,  $J = 1.7$  Hz, 1 H), 8.44 (d,  $J = 8.9$  Hz, 1 H), 8.06 (dd,  $J = 8.9, 1.7$  Hz, 1 H), 7.63 (s, 2 H), 7.47 (d,  $J = 8.8$  Hz, 1 H), 7.28 (d,  $J = 2.4$  Hz, 1 H), 7.24 (d,  $J = 1.7$  Hz, 1 H), 7.04 (dd,  $J = 8.9, 2.4$  Hz, 1 H), 5.02-4.94 (m, 1 H), 4.74-4.62 (m, 2 H), 4.38-4.33 (m, 2 H), 4.18-4.12 (m, 2 H), 3.57-3.51 (m, 2 H), 2.88 (s, 6 H);  $^{13}\text{C}$  NMR  $\delta$  160.6, 152.1, 147.0, 142.6, 142.5, 132.3, 132.2, 130.4, 130.0, 127.3, 125.6, 124.4, 121.3, 120.5, 116.2, 116.0, 113.4, 106.0, 104.0, 62.7, 55.5, 54.8, 47.6, 42.8, 41.4. Anal. ( $\text{C}_{26}\text{H}_{26}\text{ClN}_5\text{O}_6\text{S}\cdot\text{HCl}\cdot\frac{1}{2}\text{H}_2\text{O}$ ) C, H, N.

# Synthesis of 13 and 29.

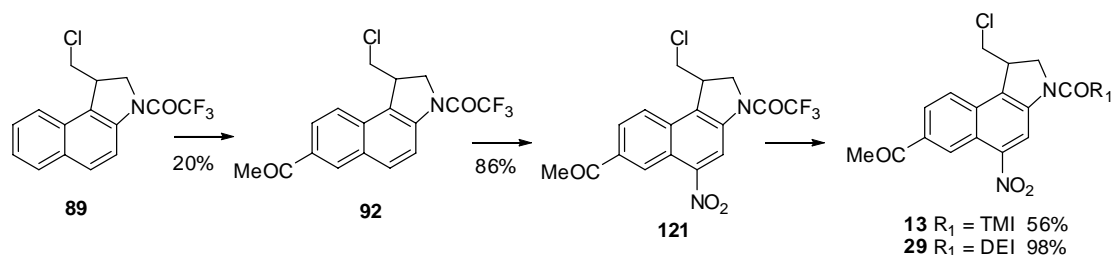

## 7-Acetyl-1-(chloromethyl)-3-(trifluoroacetyl)-1,2-dihydro-3H-benzo[e]indole (**92**).

Acylation of **89** (0.88 g, 2.8 mmol) with  $\text{AlCl}_3$  and  $\text{AcCl}$  in  $\text{PhNO}_2$  at  $0\text{ }^\circ\text{C}$ , stirring at room temperature for 16 h, and workup as above, gave a crude product. Chromatography on silica gel, eluting with  $\text{EtOAc}$ /petroleum ether (from 0:1 to 1:3) gave **92** (196 mg, 33% based on consumption of starting material): mp ( $\text{EtOAc}$ /petroleum ether)  $168\text{--}170\text{ }^\circ\text{C}$ ;  $^1\text{H}$  NMR ( $\text{CDCl}_3$ )  $\delta$  8.52 (d,  $J = 8.9$  Hz, 1 H), 8.51 (s, 1 H), 8.14 (dd,  $J = 8.8, 1.7$  Hz, 1 H), 8.02 (d,  $J = 9.0$  Hz, 1 H), 7.84 (d,  $J = 8.8$  Hz, 1 H), 4.68–4.62 (m, 1 H), 4.49–4.41 (m, 1 H), 4.28–4.19 (m, 1 H), 3.99–3.93 (m, 1 H), 3.61–3.55 (m, 1 H), 2.74 (s, 3 H);  $^{13}\text{C}$  NMR  $\delta$  197.6, 182.8, 154.9 (q,  $J_{\text{C-F}}$  38.4 Hz), 142.1, 134.1, 132.2, 131.3, 131.1, 125.7, 125.5, 131.1, 118.1, 116.0 (q,  $J_{\text{C-F}}$  288 Hz), 52.7, 45.4, 42.6, 26.6. Anal. ( $\text{C}_{17}\text{H}_{13}\text{ClF}_3\text{NO}_2$ ) C, H, N.

Further elution gave recovered **89** (360 mg, 40%).

## 7-Acetyl-1-(chloromethyl)-5-nitro-3-(trifluoroacetyl)-1,2-dihydro-3H-benzo[e]indole (**121**).

A solution of **92** (200 mg, 0.56 mmol) in  $\text{cH}_2\text{SO}_4$  (10 mL) was cooled to  $5\text{ }^\circ\text{C}$  and treated with  $\text{KNO}_3$  (60 mg, 0.6 mmol) in one portion. The mixture was stirred vigorously for 30 min at  $5\text{ }^\circ\text{C}$ . The reaction was quenched with cold water and the mixture was extracted with  $\text{EtOAc}$  ( $3 \times 50$  mL). The extracts were dried and concentrated under reduced pressure. Chromatography of the residue on silica gel, eluting with  $\text{EtOAc}$ /petroleum ether (from 1:4 to 1:1) gave **121** (177 mg, 86%) as an orange solid: mp ( $\text{EtOAc}$ /petroleum ether)  $158\text{--}160\text{ }^\circ\text{C}$ ;  $^1\text{H}$  NMR ( $\text{CDCl}_3$ )  $\delta$  9.18 (s, 1 H), 9.06 (d,  $J = 1.4$  Hz, 1 H), 8.28 (dd,  $J = 8.8, 1.6$  Hz, 1 H), 7.95 (d,  $J = 8.8$  Hz, 1 H), 4.74–4.68 (m, 1 H), 4.58–4.51 (m, 1 H), 4.40–4.31 (m, 1 H), 4.00–3.92 (m, 1 H), 3.74–3.66 (m, 1 H), 2.75 (s, 3 H);  $^{13}\text{C}$  NMR  $\delta$  196.9, 149.1 (q,  $J_{\text{C-F}}$  38.8 Hz), 140.7, 136.5, 131.5, 130.9, 130.8, 127.0, 126.5, 123.6, 123.1, 115.7 (q,  $J_{\text{C-F}}$  288 Hz), 115.5, 52.8, 45.3, 42.7, 26.5. Anal. ( $\text{C}_{17}\text{H}_{12}\text{ClF}_3\text{N}_2\text{O}_4$ ) C, H, N.

**7-Acetyl-1-(chloromethyl)-5-nitro-3-(5,6,7-trimethoxyindol-2-carbonyl)-1,2-dihydro-3H-benzo[e]indole (**13**)**. Deprotection of **121** (80 mg, 0.2 mmol) and reaction with 5,6,7-trimethoxyindole-2-carboxylic acid chloride as described in the general method, and purification of the crude product by chromatography, gave **13** (60 mg, 56%): mp ( $\text{CH}_2\text{Cl}_2$ /petroleum ether)  $257\text{--}260\text{ }^\circ\text{C}$ ;  $^1\text{H}$  NMR [ $(\text{CD}_3)_2\text{SO}$ ]  $\delta$  11.58 (s, 1 H), 9.17 (s, 1 H), 8.96 (d,  $J = 1.4$  Hz, 1 H), 8.29 (d,  $J = 8.8$  Hz, 1 H), 8.15 (dd,  $J = 8.8, 1.6$  Hz, 1 H), 7.18 (d,  $J = 2.2$  Hz, 1 H), 6.97 (s, 1 H), 4.95–4.87 (m, 1 H), 4.67–4.58 (m, 2 H), 4.17–4.05 (m, 2 H), 3.94 (s, 3 H), 3.83 (s, 3 H), 3.81 (s, 3 H), 2.75 (s, 3 H);  $^{13}\text{C}$  NMR  $\delta$  197.2, 160.6, 149.3, 147.5, 142.6, 140.3, 139.0, 134.9, 131.8, 131.3, 129.6, 126.0, 125.8, 125.1, 124.5, 123.1, 120.9, 115.5, 107.2, 98.0, 61.0, 60.8, 55.9, 54.9, 47.5, 41.2, 26.6. Anal. ( $\text{C}_{27}\text{H}_{24}\text{ClN}_3\text{O}_7$ ) C, H, N.

**7-Acetyl-1-(chloromethyl)-3-{5-[2-(dimethylamino)ethoxy]indol-2-carbonyl}-5-nitro-1,2-dihydro-3H-benzo[e]indole (**29**)**. Similar deprotection of **121** (177 mg, 0.44 mmol) and reaction with

5-[2-(dimethylamino)ethoxy]indole-2-carboxylic acid hydrochloride gave **29** (230 mg, 98%): mp (CH<sub>2</sub>Cl<sub>2</sub>/MeOH) >350 °C; <sup>1</sup>H NMR [(CD<sub>3</sub>)<sub>2</sub>SO] δ 11.71 (s, 1 H), 9.23 (s, 1 H), 8.97 (d, *J* = 1.3 Hz, 1 H), 8.33 (d, *J* = 8.8 Hz, 1 H), 8.16 (dd, *J* = 8.8, 1.5 Hz, 1 H), 7.40 (d, *J* = 8.9 Hz, 1 H), 7.20 (d, *J* = 1.7 Hz, 1 H), 7.18 (d, *J* = 2.3 Hz, 1 H), 6.94 (dd, *J* = 8.9, 2.4 Hz, 1 H), 4.92-4.80 (m, 1 H), 4.74-4.60 (m, 2 H), 4.18-4.03 (m, 4 H), 2.73 (s, 3 H), 2.66 (t, *J* = 7.8 Hz, 2 H), 2.24 (s, 6 H). Anal. (C<sub>28</sub>H<sub>27</sub>ClN<sub>4</sub>O<sub>5</sub>·H<sub>2</sub>O) C, H, N, Cl.

# Synthesis of 14 and 30.

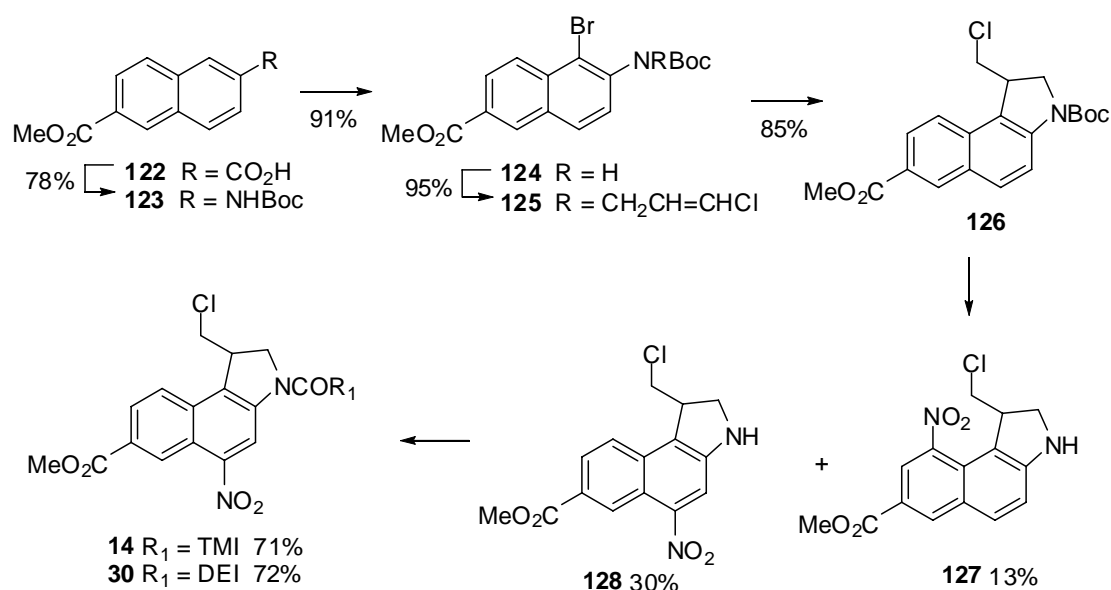

**Methyl 6-[(*tert*-butoxycarbonyl)amino]-2-naphthoate (123).** A suspension of 6-(methoxycarbonyl)-2-naphthoic acid<sup>3</sup> (**122**) (1.21 g, 5.26 mmol) in dry *t*-BuOH (20 mL) containing powdered molecular sieves (1 g) was treated with Et<sub>3</sub>N (0.88 mL, 6.31 mmol) and stirred under N<sub>2</sub> at room temperature for 30 min. DPPA (1.25 mL, 5.80 mmol) was added and the mixture was stirred at reflux for 7 h, then cooled and poured into dilute aq NaHCO<sub>3</sub>. The resulting solid was purified by chromatography on silica gel, eluting with CH<sub>2</sub>Cl<sub>2</sub>, followed by trituration with *i*Pr<sub>2</sub>O and recrystallization from EtOAc to give **123** (1.24 g, 78%) as a white solid: mp 178-180 °C; <sup>1</sup>H NMR [(CD<sub>3</sub>)<sub>2</sub>SO] δ 9.76 (s, 1 H), 8.51 (s, 1 H), 8.19 (s, 1 H), 8.02 (d, *J* = 9.0 Hz, 1 H), 7.90 (dd, *J* = 8.6, 1.6 Hz, 1 H), 7.86 (d, *J* = 8.7 Hz, 1 H), 7.59 (dd, *J* = 8.9, 2.1 Hz, 1 H), 3.89 (s, 3 H), 1.52 (s, 9 H). Anal. (C<sub>17</sub>H<sub>19</sub>NO<sub>4</sub>) C, H, N.

**Methyl 2-[(*tert*-butoxycarbonyl)amino]-1-bromo-6-naphthoate (124).** A mixture of **123** (977 mg, 3.24 mmol) and NBS (664 mg, 3.73 mmol) in CH<sub>3</sub>CN (25 mL) was stirred at reflux for 45 min, then concentrated under reduced pressure. The residue was dissolved in CH<sub>2</sub>Cl<sub>2</sub> and the solution was washed with 10% aq Na<sub>2</sub>SO<sub>3</sub> and water (×2), dried, and concentrated under reduced pressure. The residue was purified by chromatography on silica gel, eluting with CH<sub>2</sub>Cl<sub>2</sub>, to give **124** (1.12 g, 91%) as a white solid: mp (petroleum ether) 130-131 °C; <sup>1</sup>H NMR [(CD<sub>3</sub>)<sub>2</sub>SO] δ 8.93 (s, 1 H), 8.65 (d, *J* = 1.6 Hz, 1 H), 8.64 (d, *J* = 8.9 Hz, 1 H), 8.16 (d, *J* = 8.9 Hz, 1 H), 8.11 (dd, *J* = 8.9, 1.7 Hz, 1 H), 7.86 (d, *J* = 8.9 Hz, 1 H), 3.93 (s, 3 H), 1.50 (s, 9 H). Anal. (C<sub>17</sub>H<sub>18</sub>BrNO<sub>4</sub>) C, H, N, Br.

**Methyl 2-[(*tert*-butoxycarbonyl)(3-chloro-2-propen-1-yl)amino]-1-bromo-6-naphthoate (125).** A stirred solution of **124** (1.05 g, 2.76 mmol) in dry DMF (8 mL) was treated at 0 °C with NaH (132 mg, 60% in oil, 3.30 mmol). The resulting suspension was warmed to room temperature for 30 min, then cooled to 0 °C and treated with 1,3-dichloropropene (0.80 mL, 8.7 mmol, mixed isomers). The mixture was stirred at room temperature for a further 4 h then poured into dilute aqueous AcOH and extracted with EtOAc (×2). The combined organic layers were washed with dilute aq NaHCO<sub>3</sub> and water (×2), dried, and concentrated to dryness under reduced pressure at 100 °C. The residue was

chromatographed on silica gel, eluting with CH<sub>2</sub>Cl<sub>2</sub>/EtOAc (19:1) to give **125** (1.19 g, 95%) as a gum; <sup>1</sup>H NMR [(CD<sub>3</sub>)<sub>2</sub>SO] (mixture of rotamers and E and Z forms) δ 8.73 (s, 1 H), 8.34 (d, *J* = 8.9 Hz, 1 H), 8.16 (d, *J* = 8.9 Hz, 1 H), 7.63, 7.58 (2 d, *J* = 8.7 Hz, 1 H), 8.25, 8.24 (2 d, *J* = 8.6 Hz, 1 H), 6.45-6.31 (m, 1 H), 6.20-6.00 (m, 1 H), 4.58-4.48, 4.43-4.21, 4.16-4.00 (3 m, 2 H), 3.95 (s, 3 H), 1.50, 1.27 (2 s, 9 H). HRMS (FAB) calcd. for C<sub>20</sub>H<sub>22</sub><sup>79</sup>Br<sup>35</sup>ClNO<sub>4</sub> (MH<sup>+</sup>) *m/z* 454.0421, found 454.0410.

**Methyl 3-(tert-butoxycarbonyl)-1-(chloromethyl)-1,2-dihydro-3H-benzo[*e*]indole-7-carboxylate (126).** A mixture of **125** (1.16 g, 2.55 mmol), Bu<sub>3</sub>SnH (0.69 mL, 2.56 mmol) and AIBN (50 mg, 0.30 mmol) in dry benzene (15 mL) under N<sub>2</sub> was stirred at reflux for 2 h, then concentrated under reduced pressure. The residue was triturated with *i*-Pr<sub>2</sub>O and the resulting solid was purified by chromatography on silica gel, eluting with CH<sub>2</sub>Cl<sub>2</sub>/EtOAc (19:1), to give **126** (817 mg, 85%) as a white solid: mp (EtOAc) 187-189 °C; <sup>1</sup>H NMR [(CD<sub>3</sub>)<sub>2</sub>SO] δ 8.60 (d, *J* = 1.2 Hz, 1 H), 8.1 (v br, 1 H), 8.09 (d, *J* = 8.6 Hz, 1 H), 8.00 (d, *J* = 8.8 Hz, 1 H), 7.97 (dd, *J* = 8.8, 1.6 Hz, 1 H), 4.31-4.23 (m, 1 H), 4.20 (t, *J* = 10.4 Hz, 1 H), 4.09 (dd, *J* = 11.2, 2.5 Hz, 1 H), 4.04 (dd, *J* = 11.1, 3.1 Hz, 1 H), 3.96-3.88 (m, 4 H), 1.55 (s, 9 H). Anal. (C<sub>20</sub>H<sub>22</sub>ClNO<sub>4</sub>) C, H, N.

**Methyl 1-(chloromethyl)-5-nitro-1,2-dihydro-3H-benzo[*e*]indole-7-carboxylate (128).** Powdered **126** (900 mg, 2.39 mmol) was added to stirred cH<sub>2</sub>SO<sub>4</sub> (6 mL) at 0 °C and the mixture was warmed to room temperature for 15 min. The resulting solution was cooled to -5 °C and treated dropwise with a solution of KNO<sub>3</sub> (266 mg, 2.63 mmol) in cH<sub>2</sub>SO<sub>4</sub> (1.5 mL). The mixture was stirred at -5 °C for a further 5 min, then poured into ice/water and neutralized with dilute aqueous NH<sub>3</sub>. The resulting solid was chromatographed on silica gel, eluting with CH<sub>2</sub>Cl<sub>2</sub> to give crude methyl 1-(chloromethyl)-9-nitro-1,2-dihydro-3H-benzo[*e*]indole-7-carboxylate (**127**) (102 mg, 13%) as an orange-brown solid; <sup>1</sup>H NMR [(CD<sub>3</sub>)<sub>2</sub>SO] δ 8.66 (d, *J* = 1.7 Hz, 1 H), 8.30 (d, *J* = 1.7 Hz, 1 H), 8.08 (d, *J* = 8.8 Hz, 1 H), 7.25 (s, 1 H), 7.18 (d, *J* = 8.8 Hz, 1 H), 3.92-3.83 (m, 4 H), 3.74-3.67 (m, 1 H), 3.63 (dd, *J* = 10.6, 2.3 Hz, 1 H), 3.39-3.28 (m, 2 H).

Further elution with CH<sub>2</sub>Cl<sub>2</sub> gave **128** (228 mg, 30%) as a red solid: mp (CH<sub>2</sub>Cl<sub>2</sub>/*i*-Pr<sub>2</sub>O) 191-192 °C; <sup>1</sup>H NMR [(CD<sub>3</sub>)<sub>2</sub>SO] δ 8.77 (s, 1 H), 7.96 (dd, *J* = 8.9, 1.5 Hz, 1 H), 7.93 (dd, *J* = 8.9, 0.7 Hz, 1 H), 7.73 (s, 1 H), 6.74 (s, 1 H), 4.27-4.19 (m, 1 H), 3.94-3.85 (m, 5 H), 3.79 (dd, *J* = 11.0, 8.4 Hz, 1 H), 3.74 (dd, *J* = 10.5, 3.1 Hz, 1 H). Anal. (C<sub>15</sub>H<sub>13</sub>ClN<sub>2</sub>O<sub>4</sub>) C, H, N, Cl.

**Methyl 1-(chloromethyl)-3-(5,6,7-trimethoxyindol-2-carbonyl)-5-nitro-1,2-dihydro-3H-benzo[*e*]indole-7-carboxylate (14).** A suspension of 5,6,7-trimethoxyindole-2-carboxylic acid (47 mg, 0.19 mmol) in dry CH<sub>2</sub>Cl<sub>2</sub> (2 mL) was treated with oxalyl chloride (50 µl, 0.57 mmol) followed by DMF (10 µl). The mixture was stirred at room temperature for 30 min, then evaporated to dryness under reduced pressure and re-evaporated after addition of benzene. The resulting acid chloride was cooled to -5 °C and treated with an ice-cold solution of amine **128** (40 mg, 0.12 mmol) in dry pyridine (1 mL) containing DMAP (4 mg). The mixture was stirred at room temperature for 15 min, then poured into dilute aqueous KHCO<sub>3</sub>. The precipitated solid was purified by chromatography on silica gel, eluting with CH<sub>2</sub>Cl<sub>2</sub>/EtOAc (9:1), to give **14** (49 mg, 71%) as an orange solid: mp (CH<sub>2</sub>Cl<sub>2</sub>/*i*-Pr<sub>2</sub>O) 256-257 °C; <sup>1</sup>H NMR [(CD<sub>3</sub>)<sub>2</sub>SO] δ 11.60 (d, *J* = 1.8 Hz, 1 H), 9.19 (s, 1 H), 9.03 (d, *J* = 1.5 Hz, 1 H), 8.34 (d, *J* = 8.8 Hz, 1 H), 8.16 (dd, *J* = 8.8, 1.6 Hz, 1 H), 7.19 (d, *J* = 2.2 Hz, 1 H), 6.98 (s, 1 H), 4.92 (dd, *J* = 10.6, 2.3 Hz, 1 H), 3.39-3.28 (m, 2 H).



= 10.6, 9.6 Hz, 1 H), 4.69-4.57 (m, 2 H), 4.18-4.05 (m, 2 H), 3.96 (s, 3 H), 3.94 (s, 3 H), 3.83 (s, 3 H), 3.81 (s, 3 H). Anal. (C<sub>27</sub>H<sub>24</sub>ClN<sub>3</sub>O<sub>8</sub>) C, H, N.

**Methyl 1-(chloromethyl)-3-{5-[2-(dimethylamino)ethoxy]indol-2-carbonyl}-5-nitro-1,2-dihydro-3*H*-benzo[*e*]indole-7-carboxylate (30).** A mixture of **128** (80 mg, 0.25 mmol), 5-[2-(dimethylamino)ethoxy]indole-2-carboxylic acid hydrochloride (85 mg, 0.30 mmol), EDCI (191 mg, 1.00 mmol) and anhydrous TsOH (25 mg, 0.15 mmol) in dry DMA (4 mL) was stirred under N<sub>2</sub> at room temperature for 7 h, then poured into dilute aqueous NH<sub>3</sub>. The resulting solid was recrystallized twice from CH<sub>2</sub>Cl<sub>2</sub>/EtOAc/i-Pr<sub>2</sub>O to give **30**. Treatment of a solution of **30** in CH<sub>2</sub>Cl<sub>2</sub> with HCl(g)/EtOAc/hexane gave **30**·HCl (106 mg, 72%) as a yellow solid: mp >300 °C; <sup>1</sup>H NMR [(CD<sub>3</sub>)<sub>2</sub>SO] δ 11.82 (d, *J* = 1.8 Hz, 1 H), 10.14 (br s, 1 H), 9.24 (s, 1 H), 9.03 (d, *J* = 1.4 Hz, 1 H), 8.35 (d, *J* = 8.7 Hz, 1 H), 8.17 (dd, *J* = 8.8, 1.6 Hz, 1 H), 7.47 (d, *J* = 8.9 Hz, 1 H), 7.28 (d, *J* = 2.4 Hz, 1 H), 7.24 (d, *J* = 1.6 Hz, 1 H), 7.04 (dd, *J* = 8.9, 2.4 Hz, 1 H), 4.97 (dd, *J* = 10.7, 9.7 Hz, 1 H), 4.71 (dd, *J* = 10.9, 2.4 Hz, 1 H), 4.68-4.61 (m, 1 H), 4.37 (t, *J* = 5.1 Hz, 2 H), 4.18-4.08 (m, 2 H), 3.96 (s, 3 H), 3.53 (t, *J* = 5.0 Hz, 2 H), 2.87 (s, 6 H). Anal. (C<sub>28</sub>H<sub>27</sub>ClN<sub>4</sub>O<sub>6</sub>·HCl·0.5H<sub>2</sub>O) C, H, N.

Synthesis of **15** and **31**.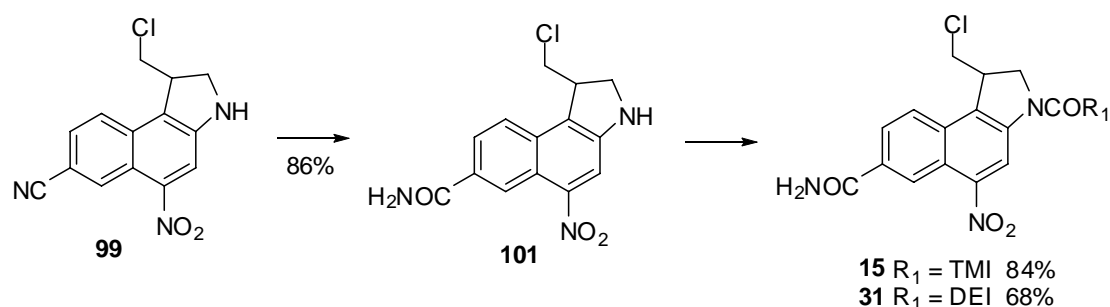

**1-(Chloromethyl)-5-nitro-1,2-dihydro-3H-benzo[e]indole-7-carboxamide (101).** A solution of **99** (100 mg, 0.35 mmol) in a mixture of  $\text{CH}_2\text{SO}_4$  (1.8 mL) and water (0.2 mL) was heated at 65 °C for 1 h, then cooled and neutralized with saturated aq  $\text{KHCO}_3$ . The precipitate was collected, washed with water, and dissolved in warm EtOAc. The solution was filtered through a column of silica gel and then concentrated and diluted with  $i\text{Pr}_2\text{O}$  to give **101** (92 mg, 86%) as a red solid: mp (EtOAc/ $i\text{Pr}_2\text{O}$ ) >300 °C;  $^1\text{H}$  NMR [ $(\text{CD}_3)_2\text{SO}$ ]  $\delta$  8.61 (d,  $J = 1.3$  Hz, 1 H), 8.09, 7.39 (2 br s, 2 H), 7.95 (dd,  $J = 8.8, 1.7$  Hz, 1 H), 7.89 (d,  $J = 8.7$  Hz, 1 H), 7.66 (s, 1 H), 6.54 (s, 1 H), 4.26-4.18 (m, 1 H), 3.91 (dd,  $J = 11.0, 3.8$  Hz, 1 H), 3.86 (td,  $J = 9.9, 2.3$  Hz, 1 H), 3.78 (dd,  $J = 11.0, 8.5$  Hz, 1 H), 3.72 (dd,  $J = 10.3, 2.6$  Hz, 1 H). Anal. ( $\text{C}_{14}\text{H}_{12}\text{ClN}_3\text{O}_3$ ) C, H, N.

**1-(Chloromethyl)-5-nitro-3-[5,6,7-trimethoxyindol-2-carbonyl]-1,2-dihydro-3H-benzo[e]indole-7-carboxamide (15).** A suspension of 5,6,7-trimethoxyindole-2-carboxylic acid (63 mg, 0.25 mmol) in dry  $\text{CH}_2\text{Cl}_2$  (2 mL) was treated with oxalyl chloride (65  $\mu\text{L}$ , 0.75 mmol), followed by DMF (10  $\mu\text{L}$ ), and the mixture was stirred at room temperature for 30 min. The mixture was evaporated under reduced pressure and then azeotroped with benzene. The resulting acid chloride was cooled to -5 °C and treated with an ice-cold solution of **101** (50 mg, 0.16 mmol) in dry pyridine (1 mL) containing DMAP (4 mg). After stirring at room temperature for 30 min the mixture was poured into dilute aq  $\text{KHCO}_3$ , and the precipitate was collected, washed with water, and dissolved in EtOAc/THF (4:1). This solution was filtered through a column of silica gel and then concentrated to give **15** (74 mg, 84%) as a yellow solid: mp (THF/EtOAc) 287-289 °C;  $^1\text{H}$  NMR [ $(\text{CD}_3)_2\text{SO}$ ]  $\delta$  11.58 (d,  $J = 1.6$  Hz, 1 H), 9.12 (s, 1 H), 8.85 (d,  $J = 1.4$  Hz, 1 H), 8.28 (d,  $J = 8.7$  Hz, 1 H), 8.27, 7.60 (2 s, 2 H), 8.15 (dd,  $J = 8.8, 1.6$  Hz, 1 H), 7.18 (d,  $J = 2.2$  Hz, 1 H), 6.99 (s, 1 H), 4.92 (dd,  $J = 10.7, 9.5$  Hz, 1 H), 4.68-4.56 (m, 2 H), 4.18-4.06 (m, 2 H), 3.94 (s, 3 H), 3.83 (s, 3 H), 3.81 (s, 3 H). Anal. ( $\text{C}_{26}\text{H}_{23}\text{ClN}_4\text{O}_7$ ) C, H, N.

**1-(Chloromethyl)-3-[5-[2-(dimethylamino)ethoxy]indol-2-carbonyl]-5-nitro-1,2-dihydro-3H-benzo[e]indole-7-carboxamide (31).** A mixture of **101** (86 mg, 0.28 mmol), 5-[2-(dimethylamino)ethoxy]indole-2-carboxylic acid hydrochloride (96 mg, 0.34 mmol), EDCI (216 mg, 1.13 mmol) and anhydrous TsOH (30 mg, 0.17 mmol) in dry DMA (4 mL) was stirred at room temperature under  $\text{N}_2$  for 2 h, then poured into dilute aq  $\text{NH}_3$ . The precipitate was collected, washed with water, stirred as a suspension in MeCN (30 mL) for 1 h, and then re-collected to provide crude **31**. Treatment of a suspension of the free base in MeOH with  $\text{HCl(g)}/\text{EtOAc}/\text{hexane}$ , followed by crystallization from MeOH, gave **31**·HCl (109 mg, 68%) as a yellow solid: mp >300 °C;  $^1\text{H}$  NMR [ $(\text{CD}_3)_2\text{SO}$ ]  $\delta$  11.80 (d,  $J = 1.7$  Hz, 1 H), 10.09 (br s, 1 H), 9.16 (s, 1 H), 8.85 (d,  $J = 1.5$  Hz, 1 H), 8.30

(d,  $J = 8.7$  Hz, 1 H), 8.29, 7.61 (2 br s, 2 H), 8.16 (dd,  $J = 8.8, 1.6$  Hz, 1 H), 7.47 (d,  $J = 8.9$  Hz, 1 H), 7.28 (d,  $J = 2.4$  Hz, 1 H), 7.23 (d,  $J = 1.7$  Hz, 1 H), 7.04 (dd,  $J = 8.9, 2.4$  Hz, 1 H), 4.96 (dd,  $J = 10.7, 9.7$  Hz, 1 H), 4.70 (dd,  $J = 10.9, 2.5$  Hz, 1 H), 4.68-4.59 (m, 1 H), 4.36 (t,  $J = 5.1$  Hz, 2 H), 4.20-4.07 (m, 2 H), 3.50 (t,  $J = 4.9$  Hz, 2 H), 2.87 (s, 6 H). Anal. ( $\text{C}_{26}\text{H}_{26}\text{ClN}_5\text{O}_5 \cdot \text{HCl} \cdot \text{H}_2\text{O}$ ) C, H, N.

## Synthesis of 16 and 32.

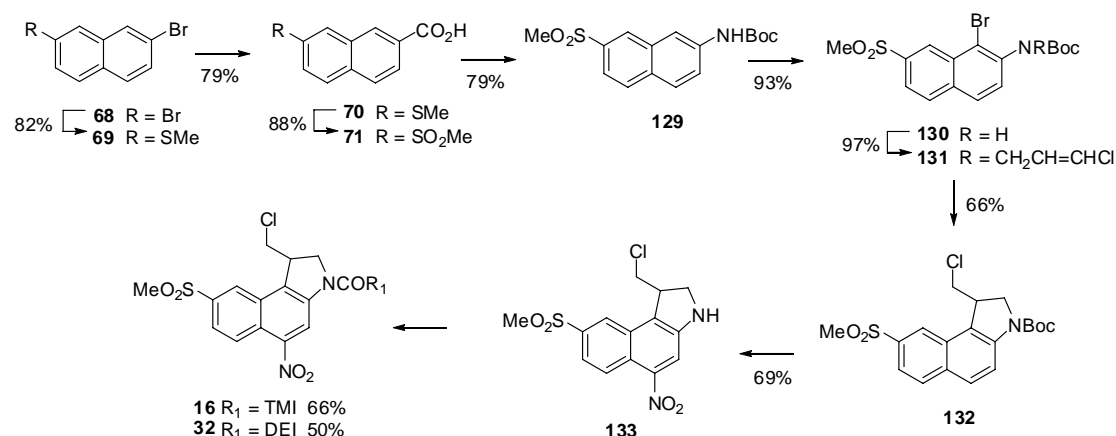

**2-Bromo-7-(methylsulfanyl)naphthalene (69).** A stirred solution of 2,7-dibromonaphthalene (**68**) (5.72 g, 20.0 mmol) in THF (80 mL) was treated dropwise at -78 °C with *n*-BuLi (2.5 M in hexanes, 8.40 mL, 21.0 mmol) under N<sub>2</sub>. The mixture was stirred at -78 °C for 20 min, then treated slowly with dimethyl disulfide (2.16 mL, 24 mmol) and allowed to warm to room temperature. The solvent was removed under reduced pressure to give a residue that was shaken with water, and the resulting solid was crystallized from petroleum ether to give **69** (4.14 g, 82%): mp 80-81 °C; <sup>1</sup>H NMR [(CD<sub>3</sub>)<sub>2</sub>SO] δ 8.11 (d, *J* = 1.9 Hz, 1 H), 7.86 (d, *J* = 9.1 Hz, 1 H), 7.83 (d, *J* = 9.1 Hz, 1 H), 7.71 (d, *J* = 1.8 Hz, 1 H), 7.54 (dd, *J* = 8.72, 2.0 Hz, 1 H), 7.44 (dd, *J* = 8.6, 2.0 Hz, 1 H), 2.58 (s, 3 H). Anal. (C<sub>11</sub>H<sub>9</sub>BrS) C, H, S.

**7-(Methylsulfanyl)-2-naphthoic acid (70).** A stirred solution of **69** (850 mg, 3.36 mmol) in THF (10 mL) was treated at -78 °C with *n*-BuLi (2.5 M in hexanes, 1.48 mL, 3.70 mmol) under N<sub>2</sub>. The mixture was stirred at -78 °C for 15 min, then treated with excess CO<sub>2</sub>(g) and allowed to warm to room temperature. The solvent was removed under reduced pressure, and the residue was partitioned between water and EtOAc. The aqueous layer was acidified, and the resulting solid was crystallized from MeOH to give **70** (577 mg, 79%): mp 217 °C; <sup>1</sup>H NMR [(CD<sub>3</sub>)<sub>2</sub>SO] δ 13.0 (v br, 1 H), 8.53 (d, *J* = 0.7 Hz, 1 H), 7.98-7.87 (m, 4 H), 7.53 (dd, *J* = 8.7, 1.9 Hz, 1 H), 2.60 (s, 3 H). Anal. (C<sub>12</sub>H<sub>10</sub>O<sub>2</sub>S) C, H.

**7-(Methylsulfonyl)-2-naphthoic acid (71).** A mixture of **70** (2.00 g, 9.16 mmol) and NaBO<sub>3</sub>·4H<sub>2</sub>O (8.00 g, 52 mmol) in AcOH (50 mL) was stirred at 55 °C for 2 h, then cooled and diluted with water. The resulting solid was recrystallized twice from EtOAc to give **71** (2.02 g, 88%) as a white solid: mp 273-274 °C; <sup>1</sup>H NMR [(CD<sub>3</sub>)<sub>2</sub>SO] δ 13.3 (br s, 1 H), 8.85 (d, *J* = 0.5 Hz, 1 H), 8.79 (d, *J* = 1.8 Hz, 1 H), 8.27 (d, *J* = 8.7 Hz, 1 H), 8.18 (2 s, 2 H), 8.08 (dd, *J* = 8.7, 1.9 Hz, 1 H), 3.25 (after D<sub>2</sub>O exchange, s, 3 H). Anal. (C<sub>12</sub>H<sub>10</sub>O<sub>4</sub>S) C, H.

***tert*-Butyl 7-(methylsulfonyl)-2-naphthylcarbamate (129).** A suspension of acid **71** (2.08 g, 8.31 mmol) in dry *t*-BuOH (30 mL) containing powdered molecular sieves (1 g) was treated with Et<sub>3</sub>N (1.39 mL, 9.97 mmol) and stirred under N<sub>2</sub> at room temperature for 30 min. DPPA (1.97 mL, 9.14 mmol) was added and the mixture was stirred at reflux for 7 h, then concentrated to half volume under reduced pressure and poured into dilute aq KHCO<sub>3</sub>. The resulting solid was purified by

chromatography on silica gel, eluting with CH<sub>2</sub>Cl<sub>2</sub>/EtOAc (19:1), followed by recrystallization from CH<sub>2</sub>Cl<sub>2</sub>/iPr<sub>2</sub>O to give **129** (2.11 g, 79%) as a white solid: mp 179-180 °C; <sup>1</sup>H NMR [(CD<sub>3</sub>)<sub>2</sub>SO] δ 9.76 (s, 1 H), 8.39 (d, *J* = 1.5 Hz, 1 H), 8.28 (d, *J* = 1.5 Hz, 1 H), 8.06 (d, *J* = 8.6 Hz, 1 H), 7.98 (d, *J* = 9.0 Hz, 1 H), 7.77 (dd, *J* = 8.6, 1.9 Hz, 1 H), 7.74 (dd, *J* = 9.2, 2.0 Hz, 1 H), 3.27 (s, 3 H), 1.52 (s, 9 H). Anal. (C<sub>16</sub>H<sub>19</sub>NO<sub>4</sub>S) C, H, N.

**tert-Butyl 1-bromo-7-(methylsulfonyl)-2-naphthylcarbamate (130).** A mixture of **129** (2.05 g, 6.38 mmol) and NBS (1.31 g, 7.36 mmol) in MeCN (40 mL) was stirred at reflux for 2 h, then concentrated under reduced pressure. The residue was dissolved in CH<sub>2</sub>Cl<sub>2</sub>, and the solution was washed with 10% aq Na<sub>2</sub>SO<sub>3</sub> and water, dried and concentrated under reduced pressure. The residue was purified by chromatography on silica gel, eluting with CH<sub>2</sub>Cl<sub>2</sub>/EtOAc (19:1), followed by recrystallization from MeOH to give **130** (2.37 g, 93%) as a white solid: mp 166-167 °C; <sup>1</sup>H NMR [(CD<sub>3</sub>)<sub>2</sub>SO] δ 8.99 (s, 1 H), 8.70 (d, *J* = 1.7 Hz, 1 H), 8.25 (d, *J* = 8.5 Hz, 1 H), 8.10 (d, *J* = 8.8 Hz, 1 H), 8.00 (dd, *J* = 8.5, 1.8 Hz, 1 H), 7.97 (d, *J* = 8.9 Hz, 1 H), 3.32 (s, 3 H), 1.50 (s, 9 H). Anal. (C<sub>16</sub>H<sub>18</sub>BrNO<sub>4</sub>S) C, H, N.

**tert-Butyl 1-bromo-7-(methylsulfonyl)-2-naphthyl(3-chloro-2-propen-1-yl)carbamate (131).** A stirred solution of **130** (2.29 g, 5.72 mmol) in dry DMF (20 mL) was treated portionwise at 0 °C with NaH (275 mg, 60% in oil, 6.88 mmol). The mixture was warmed to room temperature for 30 min, then cooled to 0 °C and treated with 1,3-dichloropropene (1.66 mL, 18 mmol, mixed isomers). The mixture was stirred at room temperature for a further 6 h, then diluted with 10% aq NaCl and extracted with EtOAc (×2). The combined organic layers were washed with water (×2), dried, and concentrated to dryness under reduced pressure at 100 °C. The residue was chromatographed on silica gel, eluting with CH<sub>2</sub>Cl<sub>2</sub>/EtOAc (19:1) to give crude **131** (2.63 g, 97%) as a foam: <sup>1</sup>H NMR [(CD<sub>3</sub>)<sub>2</sub>SO] (mixture of rotamers and E and Z forms) δ 8.78 (s, 1 H), 8.32 (dd, *J* = 8.6, 2.2 Hz, 1 H), 8.18, 8.17 (2d, *J* = 8.7 Hz, 1 H), 8.13-8.06 (m, 1 H), 7.75, 7.70 (2 d, *J* = 8.7 Hz, 1 H), 6.44-6.29 (m, 1 H), 6.20-6.01 (m, 1 H), 4.58-4.48, 4.43-4.22, 4.16-4.05 (3 m, 2 H), 3.35 (s, 3 H), 1.50, 1.27 (2 s, 9 H). HRMS (FAB) calcd. for C<sub>19</sub>H<sub>22</sub><sup>79</sup>Br<sup>35</sup>ClNO<sub>4</sub>S (MH<sup>+</sup>) *m/z* 474.0141, found 474.0143.

**tert-Butyl 1-(chloromethyl)-8-(methylsulfonyl)-1,2-dihydro-3H-benzo[e]indole-3-carboxylate (132).** A solution of **131** (1.60 g, 3.37 mmol) in dry benzene (30 mL) was treated with Bu<sub>3</sub>SnH (0.91 mL, 3.38 mmol) followed by AIBN (0.1 g, 0.6 mmol). The mixture was stirred under N<sub>2</sub> at reflux for 2 h, then concentrated under reduced pressure. The residue was dissolved in EtOAc, and the solution was diluted with hexane and refrigerated. The resulting semisolid was chromatographed on silica gel, eluting with CH<sub>2</sub>Cl<sub>2</sub>/EtOAc (19:1), and the product was triturated with i-Pr<sub>2</sub>O/hexane to give **132** (0.88 g, 66%) as an amorphous solid: <sup>1</sup>H NMR [(CD<sub>3</sub>)<sub>2</sub>SO] δ 8.41 (d, *J* = 1.6 Hz, 1 H), 8.2 (v br, 1 H), 8.17 (d, *J* = 8.6 Hz, 1 H), 8.03 (d, *J* = 8.9 Hz, 1 H), 7.80 (dd, *J* = 8.6, 1.8 Hz, 1 H), 4.42-4.33 (m, 1 H), 4.21 (t, *J* = 10.4 Hz, 1 H), 4.12 (dd, *J* = 11.6, 2.9 Hz, 1 H), 4.07 (dd, *J* = 11.2, 3.4 Hz, 1 H), 3.89 (dd, *J* = 11.2, 7.1 Hz, 1 H), 3.33 (s, 3 H), 1.55 (s, 9 H). Anal. (C<sub>19</sub>H<sub>22</sub>ClNO<sub>4</sub>S·½*i*-Pr<sub>2</sub>O) C, H, N.

**1-(Chloromethyl)-8-(methylsulfonyl)-5-nitro-1,2-dihydro-3H-benzo[e]indole (133).** Powdered **132** (350 mg, 0.88 mmol) was added to stirred cH<sub>2</sub>SO<sub>4</sub> (4 mL) at 0 °C and the mixture was warmed to room temperature for 20 min. The resulting solution of amine was cooled to -5 °C and treated dropwise with a solution of KNO<sub>3</sub> (98 mg, 0.97 mmol) in cH<sub>2</sub>SO<sub>4</sub> (1 mL). The mixture was

stirred at 0°C for a further 5 min, then poured into ice/water and neutralized with dilute aq NH<sub>3</sub>. The resulting solid was filtered off, dissolved in CH<sub>2</sub>Cl<sub>2</sub>, and the solution was filtered through a column of silica gel and evaporated to dryness. Recrystallization from CH<sub>2</sub>Cl<sub>2</sub>/i-Pr<sub>2</sub>O followed by EtOAc gave **133** (207 mg, 69%) as a red solid: mp 193-194 °C; <sup>1</sup>H NMR [(CD<sub>3</sub>)<sub>2</sub>SO] δ 8.34 (d, *J* = 1.5 Hz, 1 H), 8.31 (d, *J* = 9.1 Hz, 1 H), 7.82 (s, 1 H), 7.76 (dd, *J* = 9.1, 1.9 Hz, 1 H), 6.62 (br s, 1 H), 4.37-4.28 (m, 1 H), 3.93 (dd, *J* = 11.1, 4.1 Hz, 1 H), 3.87 (td, *J* = 9.8, 2.3 Hz, 1 H), 3.80-3.70 (m, 2 H), 3.33 (s, 3 H). Anal. (C<sub>14</sub>H<sub>13</sub>ClN<sub>2</sub>O<sub>4</sub>S) C, H, N. The structure of **133** was confirmed by x-ray crystallography.

**1-(Chloromethyl)-8-(methylsulfonyl)-5-nitro-3-(5,6,7-trimethoxyindol-2-carbonyl)-1,2-dihydro-3H-benzo[*e*]indole (16).** A suspension of 5,6,7-trimethoxyindole-2-carboxylic acid (77 mg, 0.31 mmol) in dry CH<sub>2</sub>Cl<sub>2</sub> (3 mL) was treated with oxalyl chloride (80 μL, 0.92 mmol) followed by DMF (10 μL). The mixture was stirred at room temperature for 30 min, then evaporated to dryness under reduced pressure and re-evaporated after addition of benzene. The resulting acid chloride was cooled to -5°C and treated with an ice-cold solution of **133** (70 mg, 0.21 mmol) in dry pyridine (2 mL) containing DMAP (5 mg). The mixture was warmed to room temperature for 15 min then poured into dilute aq KHCO<sub>3</sub> and the precipitated solid was collected and dissolved in CH<sub>2</sub>Cl<sub>2</sub>/EtOAc (8:1). The solution was filtered through a column of silica gel and the product was recrystallized from CH<sub>2</sub>Cl<sub>2</sub>/EtOAc to give **16** (78 mg, 66%) as an orange solid: mp 265 °C; <sup>1</sup>H NMR [(CD<sub>3</sub>)<sub>2</sub>SO] δ 11.61 (d, *J* = 1.8 Hz, 1 H), 9.26 (s, 1 H), 8.69 (d, *J* = 1.5 Hz, 1 H), 8.59 (d, *J* = 9.2 Hz, 1 H), 8.13 (dd, *J* = 9.2, 1.8 Hz, 1 H), 7.21 (d, *J* = 2.2 Hz, 1 H), 6.98 (s, 1 H), 4.93 (dd, *J* = 10.7, 9.4 Hz, 1 H), 4.78-4.70 (m, 1 H), 4.66 (dd, *J* = 10.9, 2.1 Hz, 1 H), 4.16 (dd, *J* = 11.3, 3.5 Hz, 1 H), 4.07 (t, *J* = 5.7 Hz, 1 H), 3.94 (s, 3 H), 3.83 (s, 3 H), 3.81 (s, 3 H), 3.42 (s, 3 H). Anal. (C<sub>26</sub>H<sub>24</sub>ClN<sub>3</sub>O<sub>8</sub>S) C, H, N.

**1-(Chloromethyl)-3-{5-[2-(dimethylamino)ethoxy]indol-2-carbonyl}-8-(methylsulfonyl)-5-nitro-1,2-dihydro-3H-benzo[*e*]indole (32).** A mixture of **133** (80 mg, 0.23 mmol), 5-[2-(dimethylamino)ethoxy]-indol-2-carboxylic acid hydrochloride (80 mg, 0.28 mmol), EDCI (180 mg, 0.94 mmol) and anhydrous TsOH (30 mg, 0.17 mmol) in dry DMA (5 mL) under N<sub>2</sub> was stirred at room temperature for 3 h, then poured into dilute aq NH<sub>3</sub>. The precipitated solid was collected, stirred as a suspension in MeOH (10 mL) for 15 min, cooled to 0°C and then recollected to give crude **32**. Treatment of **32** in MeOH/CH<sub>2</sub>Cl<sub>2</sub> with HCl(g)/EtOAc/hexane, followed by crystallization from MeOH gave **32**·HCl (71 mg, 50%) as a yellow solid: mp >300 °C; <sup>1</sup>H NMR [(CD<sub>3</sub>)<sub>2</sub>SO] δ 11.82 (s, 1 H), 10.0 (v br, 1 H), 9.31 (s, 1 H), 8.70 (d, *J* = 1.5 Hz, 1 H), 8.60 (d, *J* = 9.2 Hz, 1 H), 8.14 (dd, *J* = 9.2, 1.8 Hz, 1 H), 7.47 (d, *J* = 8.9 Hz, 1 H), 7.27 (d, *J* = 2.3 Hz, 1 H), 7.25 (d, *J* = 1.7 Hz, 1 H), 7.04 (dd, *J* = 8.9, 2.4 Hz, 1 H), 4.97 (t, *J* = 9.8 Hz, 1 H), 4.82-4.69 (m, 2 H), 4.35 (t, *J* = 5.0 Hz, 2 H), 4.18 (dd, *J* = 11.3, 3.2 Hz, 1 H), 4.08 (dd, *J* = 11.4, 5.7 Hz, 1 H), 3.52 (br s, 2 H), 3.42 (s, 3H), 2.87 (s, 6 H). Anal. (C<sub>27</sub>H<sub>27</sub>ClN<sub>4</sub>O<sub>6</sub>S·HCl) C, H, N.



give **74** (4.60 g, 99%), as a colorless powder: mp 279-283 °C (Lit mp<sup>4</sup> 286-288 °C); <sup>1</sup>H NMR [(CD<sub>3</sub>)<sub>2</sub>SO] δ 13.25 (br s, 1 H), 8.81 (s, 1 H), 8.75 (s, 1 H), 8.20 (d, *J* = 8.5 Hz, 1 H), 8.17 (d, *J* = 8.5 Hz, 2 H), 8.15 (d, *J* = 8.5 Hz, 2 H), 7.92 (dd, *J* = 8.5, 1.3 Hz, 1 H).

***tert*-Butyl 7-cyano-2-naphthylcarbamate (134).** A solution of **74** (6.60 g, 23 mmol), DPPA (7.71 g, 28 mmol) and Et<sub>3</sub>N (5.19 g, 51 mmol) in *t*-BuOH (50 mL) was heated under reflux for 6 h. The mixture was partitioned between EtOAc and brine. The EtOAc layer was dried and filtered through silica gel. Chromatography eluting with CH<sub>2</sub>Cl<sub>2</sub>/petroleum ether/MeOH (25:24:1) followed by recrystallization (CH<sub>2</sub>Cl<sub>2</sub>/petroleum ether) gave **134** (5.30 g, 85%) as colorless needles. A sample was recrystallized (EtOAc/*n*-hexane): mp 126-128 °C; <sup>1</sup>H NMR (CDCl<sub>3</sub>) δ 8.13 (s, 1 H), 8.07 (s, 1 H), 7.82 (d, *J* = 8.1 Hz, 1 H), 7.80 (d, *J* = 8.1 Hz, 1 H), 7.51-7.48 (m, 2 H), 6.71 (br s, 1 H), 1.56 (s, 9 H); <sup>13</sup>C NMR δ 152.5, 137.5, 133.4, 133.1, 131.0, 128.9, 128.8, 124.9, 122.0, 119.3, 114.4, 110.0, 81.3, 28.3. Anal. (C<sub>16</sub>H<sub>16</sub>N<sub>2</sub>O<sub>2</sub>) C, H, N.

***tert*-Butyl 1-bromo-7-cyano-2-naphthylcarbamate (135).** A mixture of **134** (1.90 g, 7.09 mmol), NBS (1.41 g, 7.20 mmol) and K<sub>2</sub>CO<sub>3</sub> (1.11 g, 8.50 mmol) in MeCN (20 mL) was heated at 60 °C under N<sub>2</sub> for 30 min. The solvent was removed under reduced pressure and the residue was partitioned between CH<sub>2</sub>Cl<sub>2</sub> and water. The organic layer was washed with water (×2), brine, and dried. Filtration through silica gel gave **135** (2.45 g, 100%) as a colorless powder. A sample was recrystallized (petroleum ether) to give colorless needles: mp 139-141 °C; <sup>1</sup>H NMR (CDCl<sub>3</sub>) δ 8.58 (d, *J* = 9.1 Hz, 1 H), 8.54 (d, *J* = 1.0 Hz, 1 H), 7.86 (d, *J* = 8.4 Hz, 1 H), 7.83 (d, *J* = 9.1 Hz, 1 H), 7.56 (dd, *J* = 8.3, 1.4 Hz, 1 H), 7.36 (br s, 1 H), 1.57 (s, 9 H); <sup>13</sup>C NMR δ 152.3, 136.7, 132.5, 132.0, 131.4, 129.4, 128.3, 125.6, 122.4, 119.0, 111.3, 109.4, 81.9, 28.3. Anal. (C<sub>16</sub>H<sub>15</sub>BrN<sub>2</sub>O<sub>2</sub>) C, H, N, Br.

***tert*-Butyl 1-bromo-7-cyano-2-naphthyl(3-chloro-2-propen-1-yl)carbamate (136).** A solution of **135** (2.50 g, 7.21 mmol) in DMF (20 mL) was added to a suspension of NaH (350 mg, 8.65 mmol, 60% in oil) in DMF (20 mL) at 0 °C. 1,3-Dichloropropene (1.60 g, 14 mmol) was added and the mixture was allowed to warm to room temperature over 2 h. The DMF was removed under reduced pressure and the residue was partitioned between CH<sub>2</sub>Cl<sub>2</sub> and water. The organic layer was washed with water (×2), brine (×2), and dried. Filtration through silica gel gave **136** (3.28 g, 100%) as a pale yellow oil; <sup>1</sup>H NMR (CDCl<sub>3</sub>) (mixture of rotamers and E and Z forms) δ 8.73 (s, 1 H), 7.93-7.96 (m, 1 H), 7.83-7.87 (m, 1 H), 7.68-7.70 (m, 1 H), 7.39-7.46 (m, 1 H), 6.00-6.11 (m, 2 H), 4.49-4.62 (m, 1 H), 4.33-4.43 (m, 1 H), 1.33, 1.32 (2 s, 9 H). HRMS (FAB) calcd. for C<sub>19</sub>H<sub>18</sub><sup>79</sup>Br<sup>35</sup>ClN<sub>2</sub>O<sub>2</sub> (MH<sup>+</sup>) *m/z* 421.0318, found 421.0330.

***tert*-Butyl 1-(chloromethyl)-8-cyano-1,2-dihydro-3*H*-benzo[*e*]indole-3-carboxylate (137).** A mixture of **136** (3.00 g, 7.13 mmol), Bu<sub>3</sub>SnH (2.49 g, 8.55 mmol) and AIBN (120 mg, 0.71 mmol) in benzene (20 mL) was heated under reflux for 1.5 h. The benzene was removed under reduced pressure and the residue was triturated with pentane (×4) and recrystallized (MeOH) to give **137** (2.24 g, 92%) as colorless needles: mp 138-140 °C; <sup>1</sup>H NMR (CDCl<sub>3</sub>) δ 8.35 (br s, 1 H), 8.09 (s, 1 H), 7.90 (d, *J* = 8.5 Hz, 1 H), 7.82 (d, *J* = 9.0 Hz, 1 H), 7.48 (dd, *J* = 8.5, 1.5 Hz, 1 H), 4.30 (br d, *J* = 11.2 Hz, 1 H), 4.18 (dd, *J* = 11.8, 8.7 Hz, 1 H), 4.50 (tt, *J* = 9.3, 3.0 Hz, 1 H), 3.87 (dd, *J* = 11.3, 3.3 Hz, 1 H), 3.53 (dd, *J* =



11.2, 9.6 Hz, 1 H), 1.61 (s, 9 H);  $^{13}\text{C}$  NMR  $\delta$  152.3, 142.9, 131.2, 130.2, 130.0, 128.9, 128.2, 124.2, 123.3, 119.2, 118.8, 110.5, 81.8, 52.8, 46.2, 41.5, 28.4. Anal. ( $\text{C}_{19}\text{H}_{19}\text{ClN}_2\text{O}_2$ ) C, H, N.

**1-(Chloromethyl)-5-nitro-1,2-dihydro-3H-benzo[e]indole-8-carbonitrile (100).** A solution of **137** (30 mg, 0.088 mmol) in HCl(g) saturated dioxane (3 mL) was stirred for 1 h. The solvent was evaporated to provide the crude amine hydrochloride (24 mg, 100%). This solid was cooled to 0 °C and treated with  $\text{cH}_2\text{SO}_4$  (2 mL). A cooled (0 °C) solution of  $\text{KNO}_3$  (9 mg, 0.088 mmol) in  $\text{cH}_2\text{SO}_4$  (0.5 mL) was then added dropwise. After 15 min, the mixture was poured into ice water and conc. aq  $\text{NH}_3$  was carefully added until the pH of the mixture was 3-4. Solid  $\text{KHCO}_3$  was then carefully added until the pH of the mixture was 8. The mixture was partitioned between  $\text{CH}_2\text{Cl}_2$  and water, and the aqueous layer was extracted with  $\text{CH}_2\text{Cl}_2$  ( $\times 3$ ). The combined organic extracts were washed with brine and dried. The  $\text{CH}_2\text{Cl}_2$  was removed under reduced pressure and the residue was triturated with MeOH to give **100** (18 mg, 72%) as red crystals: mp 231-234 °C;  $^1\text{H}$  NMR [ $(\text{CD}_3)_2\text{SO}$ ]  $\delta$  8.54 (dd,  $J = 1.5$ , 0.5 Hz, 1 H), 8.22 (dd,  $J = 9.0$ , 0.4 Hz, 1 H), 7.80 (s, 1 H), 7.59 (dd,  $J = 9.0$ , 1.6 Hz, 1 H), 6.63 (d,  $J = 1.3$  Hz, 1 H), 4.32-4.23 (m, 1 H), 3.95 (dd,  $J = 11.0$ , 3.8 Hz, 1 H), 3.84 (td,  $J = 10.3$ , 2.3 Hz, 1 H), 3.79-3.70 (m, 2 H);  $^{13}\text{C}$  NMR  $\delta$  151.8, 148.1, 130.6, 129.9, 126.8, 125.7, 125.0, 120.0, 119.6, 112.8, 111.4, 51.8, 47.5, 43.5. Anal. ( $\text{C}_{14}\text{H}_{10}\text{ClN}_3\text{O}_2$ ) C, H, N.

**1-(Chloromethyl)-3-{5-[2-(dimethylamino)ethoxy]indol-2-carbonyl}-5-nitro-1,2-dihydro-3H-benzo[e]indole-8-carbonitrile (33).** A solution of **100** (160 mg, 0.56 mmol) in HCl(g) saturated dioxane (15 mL) was stirred for 1 h, then the dioxane was removed under reduced pressure to give the crude amine hydrochloride (180 mg, 0.56 mmol, 100%). 5-[2-(Dimethylamino)ethoxy]indole-2-carboxylic acid hydrochloride (190 mg, 0.67 mmol), EDCI (319 mg, 1.67 mmol), and DMA (5 mL) were added and the mixture was stirred under a  $\text{N}_2$  atmosphere for 4 h. The mixture was then partitioned between  $\text{CH}_2\text{Cl}_2$  and cold (0 °C) 5% aq  $\text{KHCO}_3$ . The aqueous layer was extracted with cold  $\text{CH}_2\text{Cl}_2$  ( $\times 4$ ) and the combined extracts were washed with water ( $\times 3$ ), brine, and dried. The solvent was evaporated and the residue was dissolved in  $\text{CH}_2\text{Cl}_2/\text{MeOH}$  and solvents were concentrated under reduced pressure until precipitation began. The precipitate was filtered off and washed with MeOH to give **33** (256 mg, 89%) as an orange powder: mp >340 °C;  $^1\text{H}$  NMR [ $(\text{CD}_3)_2\text{SO}$ ]  $\delta$  11.67 (d,  $J = 1.5$  Hz, 1 H), 9.29 (s, 1 H), 8.91 (d,  $J = 1.0$  Hz, 1H), 8.49 (d,  $J = 9.1$  Hz, 1 H), 7.97 (dd,  $J = 9.1$ , 1.5 Hz, 1 H), 7.40 (d,  $J = 8.9$  Hz, 1 H), 7.20 (d,  $J = 1.7$  Hz, 1 H), 7.17 (d,  $J = 2.3$  Hz, 1 H), 6.95 (dd,  $J = 8.9$ , 2.4 Hz, 1 H), 4.95 (dd,  $J = 10.6$ , 9.5 Hz, 1 H), 4.75-4.63 (m, 2 H), 4.19-4.09 (m, 2 H), 4.07 (t,  $J = 5.9$  Hz, 2 H), 2.67 (t,  $J = 5.9$  Hz, 2 H), 2.25 (s, 6 H);  $^{13}\text{C}$  NMR  $\delta$  160.5, 152.9, 146.2, 142.1, 133.0, 131.9, 130.5, 129.6, 128.5, 127.9, 127.3, 124.9, 122.8, 118.2, 117.3, 116.4, 113.2, 111.0, 106.2, 103.1, 65.9, 57.6, 54.7, 47.9, 45.3, 41.2. Anal. ( $\text{C}_{27}\text{H}_{24}\text{ClN}_5\text{O}_4$ ) C, H, N.

# Synthesis of 17 and 34.

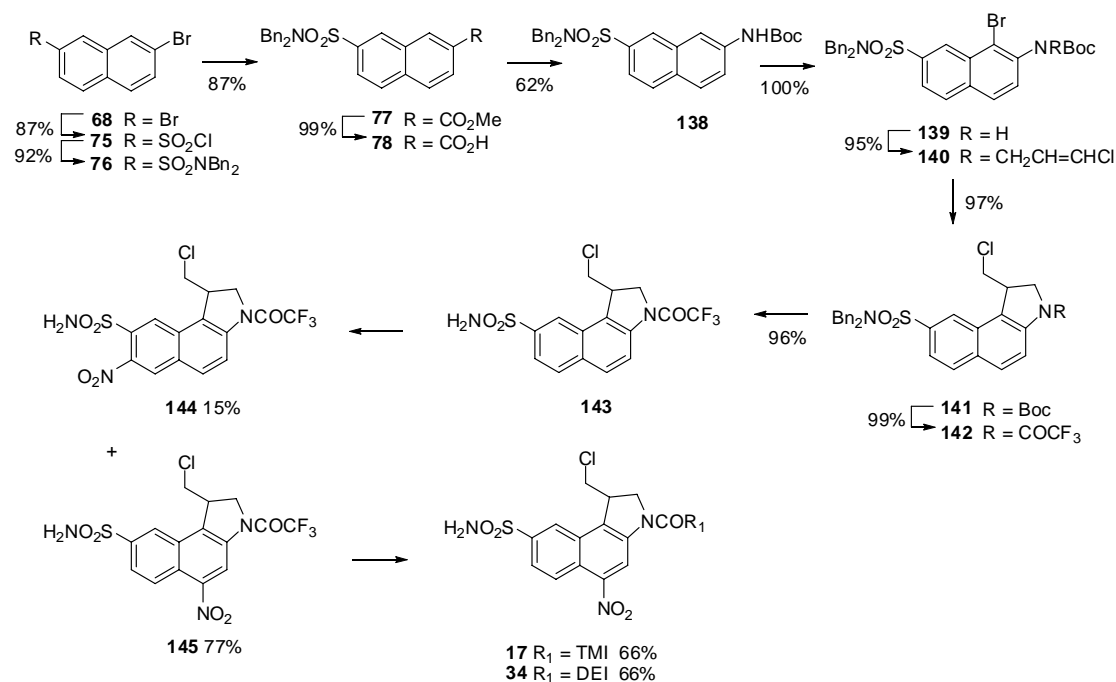

**7-Bromo-2-naphthalenesulfonyl chloride (75).** n-BuLi (1.50 mL, 3.50 mmol, 2.3 M solution in hexanes) was added to a solution of **68** (1.00 g, 3.50 mmol) in THF (15 mL) under nitrogen at -78 °C. After 20 min,  $\text{SO}_2(\text{g})$  was bubbled into the solvent and the resulting mixture was allowed to warm to room temperature and stirred for 12 h. The THF was evaporated, the resulting solid was suspended in  $\text{CH}_2\text{Cl}_2$  (25 mL) at 0 °C, and NCS (0.47 g, 3.50 mmol) was added. After 1 h the mixture was filtered through Celite and purified by chromatography on silica gel, eluting with petroleum ether/EtOAc (95:5), followed by recrystallization (petroleum ether/ $\text{Et}_2\text{O}$ ) to give **75** (1.86 g, 87%) as colorless crystals: mp 100-101 °C;  $^1\text{H}$  NMR ( $\text{CDCl}_3$ )  $\delta$  8.51 (d,  $J$  = 1.3 Hz, 1 H), 8.21 (d,  $J$  = 1.2 Hz, 1 H), 8.04 (d,  $J$  = 8.8 Hz, 1 H), 8.01 (dd,  $J$  = 8.8, 1.8 Hz, 1 H), 7.84 (d,  $J$  = 8.8 Hz, 1 H), 7.81 (dd,  $J$  = 8.8, 1.8 Hz, 1 H). Anal. ( $\text{C}_{10}\text{H}_6\text{BrClO}_2\text{S}$ ) C, H.

**N,N-Dibenzyl-7-bromo-2-naphthalenesulfonamide (76).** A mixture of **75** (1.50 g, 4.92 mmol), dibenzylamine (1.45 g, 7.38 mmol), and  $\text{Et}_3\text{N}$  (0.75 g, 7.38 mmol) in THF (15 mL) was stirred at room temperature for 48 h. The solvents were evaporated under reduced pressure and the residue was extracted with EtOAc. The EtOAc extracts were washed with water and brine, then dried and evaporated. The residue was purified by chromatography on silica gel eluting with petroleum ether/EtOAc (95:5 then 1:1) to give **76** (2.11 g, 92%). A sample was recrystallized from petroleum ether/EtOAc as colorless crystals: mp 127-129 °C;  $^1\text{H}$  NMR ( $\text{CDCl}_3$ )  $\delta$  8.25 (d,  $J$  = 1.4 Hz, 1 H), 8.05 (d,  $J$  = 1.6 Hz, 1 H), 7.91 (d,  $J$  = 8.7 Hz, 1 H), 7.79 (dd,  $J$  = 8.6, 1.8 Hz, 1 H), 7.77 (d,  $J$  = 8.5 Hz, 1 H), 7.71 (dd,  $J$  = 8.8, 1.9 Hz, 1 H), 7.22-7.15 (m, 6 H), 7.09-7.04 (m, 4 H), 4.39 (s, 4 H);  $^{13}\text{C}$  NMR  $\delta$  138.9, 135.4, 133.3, 133.0, 132.1, 131.2, 129.4, 129.3, 128.6, 128.5, 127.8, 127.3, 123.0, 121.6, 50.6. Anal. ( $\text{C}_{24}\text{H}_{20}\text{BrNO}_2\text{S} \cdot \frac{1}{10}\text{Bn}_2\text{NH}$ ) C, H, N.

**Methyl 7-[(dibenzylamino)sulfonyl]-2-naphthoate (77).** A mixture of **76** (2.10 g, 4.51 mmol), Pd(OAc)<sub>2</sub> (101 mg, 0.45 mmol), 1,3-bis(diphenylphosphino)propane (186 mg, 0.45 mmol), MeOH (30 mL), Et<sub>3</sub>N (10 mL), and DMSO (5 mL) were placed in a pressure vessel and purged with CO(g) for 5 min. The reactor was then pressurized with CO(g) (50 bar) and heated at 70 °C for 12 h. After cooling EtOAc was added and the mixture was filtered through Celite. Solvents were removed under reduced pressure and the residue was partitioned between CH<sub>2</sub>Cl<sub>2</sub> and brine. The CH<sub>2</sub>Cl<sub>2</sub> layer was dried and evaporated, and the residue was purified by chromatography on silica gel, eluting with petroleum ether/EtOAc/CH<sub>2</sub>Cl<sub>2</sub> (7:1:2) to give **77** (1.75 g, 87%). A sample was recrystallized from petroleum ether/EtOAc as colorless crystals: mp 141-142 °C; <sup>1</sup>H NMR (CDCl<sub>3</sub>) δ 8.64 (s, 1 H), 8.45 (s, 1 H), 8.22 (dd, *J* = 8.6, 1.6 Hz, 1 H), 7.98 (d, *J* = 8.4 Hz, 1 H), 7.95 (d, *J* = 7.0 Hz, 1 H), 7.88 (dd, *J* = 8.7, 1.8 Hz, 1 H), 7.22-7.15 (m, 6 H), 7.10-7.04 (m, 4 H), 4.40 (s, 4 H), 4.01 (s, 3H); <sup>13</sup>C NMR δ 166.5, 138.7, 136.6, 135.4, 132.0, 131.5, 129.6, 129.2, 129.1, 128.6, 128.5, 128.2, 128.1, 127.8, 124.8, 52.5, 50.6. Anal. (C<sub>26</sub>H<sub>23</sub>NO<sub>4</sub>S) C, H, N.

**7-[(Dibenzylamino)sulfonyl]-2-naphthoic acid (78).** A solution of KOH (720 mg, 12.8 mmol) in MeOH (5 mL) and H<sub>2</sub>O (2 mL) was added dropwise to a solution of **77** (1.90 g, 4.27 mmol) in MeOH (10 mL) and CH<sub>2</sub>Cl<sub>2</sub> (15 mL). After 48 h at room temperature CH<sub>2</sub>Cl<sub>2</sub> and H<sub>2</sub>O were added. The aqueous layer was separated and acidified to pH 2 with 2 M HCl. The resulting white precipitate was collected, dissolved in CH<sub>2</sub>Cl<sub>2</sub>, and the solution was washed with H<sub>2</sub>O and brine. The CH<sub>2</sub>Cl<sub>2</sub> layer was dried, the solvent was evaporated, and the residue was dried in a vacuum desiccator. Recrystallization from CH<sub>2</sub>Cl<sub>2</sub>/petroleum ether gave **78** (2.00 g, 99%) as colorless crystals: mp 189-190 °C; <sup>1</sup>H NMR (CDCl<sub>3</sub>) δ (CO<sub>2</sub>H not observed) 8.76 (s, 1 H), 8.47 (s, 1 H), 8.29 (dd, *J* = 8.6, 1.5 Hz, 1 H), 8.01 (d, *J* = 8.8 Hz, 1 H), 7.92 (dd, *J* = 8.7, 1.8 Hz, 1 H), 7.23-7.15 (m, 6 H), 7.12-7.05 (m, 4 H), 5.29 (s, 1 H), 4.42 (s, 4 H); <sup>13</sup>C NMR δ 170.8, 139.0, 137.0, 135.4, 133.1, 131.4, 129.7, 129.3, 128.6, 128.5, 128.4, 128.2, 128.1, 127.8, 125.3, 50.7. Anal. (C<sub>25</sub>H<sub>21</sub>NO<sub>4</sub>S) C, H, N.

**tert-Butyl 7-[(dibenzylamino)sulfonyl]-2-naphthylcarbamate (138).** A solution of **78** (1.95 g, 4.52 mmol), DPPA (1.49 g, 5.43 mmol) and Et<sub>3</sub>N (1.01 g, 9.95 mmol) in t-BuOH (40 mL) was heated at reflux for 15 h. The solvents were removed under reduced pressure and the residue purified by chromatography on silica gel, eluting with petroleum ether/EtOAc (4:1), to give **138** (1.37 g, 62%). A sample was recrystallized from Et<sub>2</sub>O/petroleum ether as colorless needles: mp 139-140 °C; <sup>1</sup>H NMR (CDCl<sub>3</sub>) δ 8.51 (d, *J* = 1.2 Hz, 1 H), 8.03 (d, *J* = 1.3 Hz, 1 H), 7.86 (d, *J* = 8.7 Hz, 1 H), 7.82 (d, *J* = 8.9 Hz, 1 H), 7.68 (dd, *J* = 8.6, 1.8 Hz, 1 H), 7.57 (dd, *J* = 8.8, 2.1 Hz, 1 H), 7.22-7.12 (m, 6 H), 7.08-7.01 (m, 4 H), 6.75 (s, 1 H), 4.37 (s, 4 H), 1.56 (s, 9 H); <sup>13</sup>C NMR δ 152.1, 137.7, 137.0, 135.1, 132.5, 130.6, 128.5, 128.2, 128.1, 127.9, 127.2, 127.1, 121.3, 120.6, 114.9, 80.6, 50.1, 27.8. Anal. (C<sub>29</sub>H<sub>30</sub>N<sub>2</sub>O<sub>4</sub>S) C, H, N.

**tert-Butyl 1-bromo-7-[(dibenzylamino)sulfonyl]-2-naphthylcarbamate (139).** A mixture of **138** (1.15 g, 2.29 mmol), NBS (450 mg, 2.52 mmol), and K<sub>2</sub>CO<sub>3</sub> (380 mg, 2.75 mmol) in MeCN (25 mL) was stirred at 40 °C under nitrogen for 30 min. The solvent was removed under reduced pressure and the residue was partitioned between EtOAc and H<sub>2</sub>O. The EtOAc layer was washed with H<sub>2</sub>O, brine, then dried and evaporated. The residue was recrystallized from EtOAc/Et<sub>2</sub>O/petroleum ether to give **139** (1.33 g, 100%) as colorless crystals: mp 150-151 °C; <sup>1</sup>H NMR (CDCl<sub>3</sub>) δ 8.69 (d, *J* = 1.6 Hz,

1 H), 8.57 (d,  $J = 9.1$  Hz, 1 H), 7.89 (d,  $J = 8.6$  Hz, 1 H), 7.85 (d,  $J = 9.1$  Hz, 1 H), 7.74 (dd,  $J = 8.6$ , 1.8 Hz, 1 H), 7.38 (s, 1 H), 7.22-7.15 (m, 6 H), 7.12-7.05 (m, 4 H), 4.40 (s, 4 H), 1.58 (s, 9 H);  $^{13}\text{C}$  NMR  $\delta$  152.4, 139.6, 136.5, 135.5, 132.0, 131.5, 129.7, 128.6, 128.5, 128.1, 127.7, 126.8, 122.1, 121.8, 110.4, 81.8, 50.6, 28.3. Anal. ( $\text{C}_{29}\text{H}_{29}\text{BrN}_2\text{O}_4\text{S}$ ) C, H, N.

***tert*-Butyl 1-bromo-7-[(dibenzylamino)sulfonyl]-2-naphthyl(3-chloro-2-propen-1-yl)carbamate (140).** NaH (107 mg, 2.69 mmol, 60% in oil) was added to a solution of **139** (1.3 g, 2.24 mmol) in DMF (15 mL) at 0 °C. 1,3-Dichloropropene (414 mg, 3.36 mmol, mixed isomers) was added and the mixture was allowed to warm to room temperature over 12 h. The DMF was evaporated under reduced pressure and the residue was partitioned between EtOAc and  $\text{H}_2\text{O}$ . The EtOAc layer was washed with  $\text{H}_2\text{O}$ , brine, then dried and evaporated. The residue was purified by chromatography on silica gel, eluting with petroleum ether/EtOAc (4:1) to give **140** (1.39 g, 95%) as a yellow foam:  $^1\text{H}$  NMR ( $\text{CDCl}_3$ ) (mixture of rotamers and E and Z forms)  $\delta$  8.86 (s, 1 H), 7.97-7.91 (m, 1 H), 7.89-7.82 (m, 2 H), 7.51-7.31, 7.26-7.16 (2 m, 7 H), 7.13-7.06 (m, 4 H), 6.14-6.01 (m, 2 H), 4.64-4.48, 4.02-3.90 (2 m, 2 H), 4.43 (s, 4 H), 1.56, 1.33 (2 s, 9 H). HRMS (FAB) calcd. for  $\text{C}_{32}\text{H}_{32}^{79}\text{Br}^{35}\text{ClN}_2\text{O}_4\text{S}$  ( $\text{MH}^+$ ) 655.1033, found 655.1032.

***tert*-Butyl 1-(chloromethyl)-8-[(dibenzylamino)sulfonyl]-1,2-dihydro-3H-benzo[*e*]indole-3-carboxylate (141).** A mixture of **140** (1.00 g, 1.53 mmol),  $\text{Bu}_3\text{SnH}$  (550 mg, 1.83 mmol), and AIBN (50 mg, 0.31 mmol) in benzene (25 mL) was heated at reflux for 15 min, then concentrated under reduced pressure. The residue was partitioned between EtOAc and  $\text{H}_2\text{O}$  and the EtOAc layer was washed with  $\text{H}_2\text{O}$ , brine and dried and evaporated. The residue was purified by chromatography on silica gel, eluting with petroleum ether/EtOAc (9:1) to give **141** (850 mg, 97%). A sample was recrystallized from  $\text{Et}_2\text{O}$ /petroleum ether as colorless needles: mp 131-133 °C;  $^1\text{H}$  NMR ( $\text{CDCl}_3$ )  $\delta$  8.30 (br s, 1 H), 8.29 (d,  $J = 1.5$  Hz, 1 H), 7.93 (d,  $J = 8.7$  Hz, 1 H), 7.84 (d,  $J = 9.0$  Hz, 1 H), 7.66 (dd,  $J = 8.6$ , 1.8 Hz, 1 H), 7.23-7.15 (m, 6 H), 7.09-7.03 (m, 4 H), 4.41 (s, 4 H), 4.28 (d,  $J = 11.5$  Hz, 1 H), 4.15 (dd,  $J = 11.6$ , 9.0 Hz, 1 H), 4.02 (tt,  $J = 9.0$ , 2.9 Hz, 1 H), 3.75 (dd,  $J = 11.3$ , 3.5 Hz, 1 H), 3.48 (dd,  $J = 11.2$ , 9.3 Hz, 1 H), 1.61 (s, 9 H);  $^{13}\text{C}$  NMR  $\delta$  152.4, 142.7, 138.9, 135.5, 131.3, 130.5, 129.8, 128.9, 128.50, 128.46, 127.7, 124.3, 122.4, 120.3, 118.4, 81.8, 52.7, 50.5, 46.4, 41.4, 28.4. Anal. ( $\text{C}_{32}\text{H}_{33}\text{ClN}_2\text{O}_4\text{S}$ ) C, H, N.

***N,N*-Dibenzyl-1-(chloromethyl)-3-(trifluoroacetyl)-1,2-dihydro-3H-benzo[*e*]indole-8-sulfonamide (142).** A solution of **141** (850 mg, 1.48 mmol) in  $\text{HCl(g)}$ -saturated dioxane (10 mL) was stirred for 4 h at room temperature. The dioxane was evaporated under reduced pressure and the resulting pale yellow solid was dissolved in pyridine (10 mL) at 0 °C. Trifluoroacetic anhydride (470 mg, 2.23 mmol) was added and the mixture was stirred at 0 °C for 30 min, then poured into ice water and extracted with EtOAc ( $\times 3$ ). The combined EtOAc extracts were washed with 1 M  $\text{HCl}$  ( $\times 3$ ),  $\text{H}_2\text{O}$ , and brine, then dried and evaporated. The residue was purified by chromatography on silica gel, eluting with petroleum ether/EtOAc (9:1) to give **142** (840 mg, 99%). A sample was recrystallized from EtOAc/ $\text{Et}_2\text{O}$ /petroleum ether as colorless crystals: mp 119-121 °C;  $^1\text{H}$  NMR ( $\text{CDCl}_3$ )  $\delta$  8.60 (d,  $J = 9.0$  Hz, 1 H), 8.25 (d,  $J = 1.7$  Hz, 1 H), 8.02 (d,  $J = 8.7$  Hz, 1 H), 7.95 (d,  $J = 9.0$  Hz, 1 H), 7.78 (dd,  $J = 8.7$ , 1.8 Hz, 1 H), 7.23-7.16 (m, 6 H), 7.10-7.04 (m, 4 H), 4.65 (d,  $J = 11.6$  Hz, 1 H), 4.48-4.37 (m, 5

H), 4.22-4.16 (m, 1 H), 3.78 (dd,  $J = 11.5, 3.5$  Hz, 1 H), 3.54 (dd,  $J = 11.5, 8.5$  Hz, 1 H). Anal. ( $C_{29}H_{24}ClF_3N_2O_3S$ ) C, H, N.

**1-(Chloromethyl)-3-(trifluoroacetyl)-1,2-dihydro-3H-benzo[e]indole-8-sulfonamide**

**(143).** Sulfonamide **142** (750 mg, 1.31 mmol) was cooled to 0 °C, dissolved in  $CH_2SO_4$  (20 mL) at 0 °C, and the solution was stirred at this temperature for 2 h. Ice water and EtOAc were added and the mixture was extracted with EtOAc ( $\times 3$ ). The combined extracts were washed with brine ( $\times 3$ ), dried, and evaporated to give **143** (490 mg, 96%). A sample was recrystallized from  $CH_2Cl_2$ /EtOAc as yellow crystals: mp 229-231 °C;  $^1H$  NMR [ $(CD_3)_2SO$ ]  $\delta$  8.45 (d,  $J = 9.0$  Hz, 1 H), 8.42 (s, 1 H), 8.21 (d,  $J = 8.7$  Hz, 1 H), 8.11 (d,  $J = 9.0$  Hz, 1 H), 7.87 (dd,  $J = 8.7, 1.7$  Hz, 1 H), 7.51 (s, 2 H), 4.65-4.57 (m, 1 H), 4.57-4.50 (m, 1 H), 4.44 (d,  $J = 10.8$  Hz, 1 H), 4.18 (dd,  $J = 11.3, 3.1$  Hz, 1 H), 4.05 (dd,  $J = 11.3, 5.9$  Hz, 1 H). Anal. ( $C_{15}H_{12}ClF_3N_2O_3S \cdot \frac{1}{2}H_2O$ ) C, H, N.

**1-(Chloromethyl)-5-nitro-3-(trifluoroacetyl)-1,2-dihydro-3H-benzo[e]indole-8-**

**sulfonamide (145).** Ice-cold  $CH_2SO_4$  (14 mL) was added to **143** (450 mg, 1.15 mmol) at 0 °C with stirring. A solution of  $KNO_3$  (128 mg, 1.26 mmol) in  $CH_2SO_4$  (1 mL) at 0 °C was then added dropwise. After 15 min the mixture was poured into ice water and extracted with EtOAc ( $\times 3$ ). The combined extracts were washed with  $H_2O$ , brine, dried, and evaporated under reduced pressure. The residue was purified by chromatography on silica gel, eluting with petroleum ether/EtOAc (3:2) to give 1-(chloromethyl)-7-nitro-3-(trifluoroacetyl)-1,2-dihydro-3H-benzo[e]indole-8-sulfonamide (**144**) (76 mg, 15%). A sample was recrystallized from petroleum ether/EtOAc as yellow crystals: mp 192-195 °C;  $^1H$  NMR [ $(CD_3)_2SO$ ]  $\delta$  8.79 (s, 1 H), 8.65 (s, 1 H), 8.59 (d,  $J = 9.0$  Hz, 1 H), 8.31 (d,  $J = 9.1$  Hz, 1 H), 7.88 (s, 2 H), 4.66 (dd,  $J = 10.5, 9.3$  Hz, 1 H), 4.58-4.51 (m, 1 H), 4.47 (d,  $J = 11.1$  Hz, 1 H), 4.19 (dd,  $J = 11.3, 3.3$  Hz, 1 H), 4.08 (dd,  $J = 11.3, 5.9$  Hz, 1 H). Anal. ( $C_{15}H_{11}ClF_3N_3O_5S$ ) C, H, N.

Further elution gave **145** (383 mg, 77%). A sample was recrystallized from petroleum ether/EtOAc as orange crystals: mp 251-254 °C;  $^1H$  NMR [ $(CD_3)_2SO$ ]  $\delta$  9.09 (s, 1 H), 8.58 (d,  $J = 8.9$  Hz, 1 H), 8.57 (d,  $J = 2.0$  Hz, 1 H), 8.11 (dd,  $J = 9.4, 1.6$  Hz, 1 H), 7.66 (s, 2 H), 4.76-4.63 (m, 2 H), 4.52 (d,  $J = 10.5$  Hz, 1 H), 4.22 (dd,  $J = 11.3, 3.1$  Hz, 1 H), 4.11 (dd,  $J = 11.4, 5.3$  Hz, 1 H). Anal. ( $C_{15}H_{11}ClF_3N_3O_5S$ ) C, H, N.

**1-(Chloromethyl)-5-nitro-3-(5,6,7-trimethoxyindol-2-carbonyl)-1,2-dihydro-3H-**

**benzo[e]indole-8-sulfonamide (17).** A solution of **145** (50 mg, 0.114 mmol) and  $Cs_2CO_3$  (58 mg, 0.172 mmol) in MeOH (2 mL), THF (2 mL), and  $CH_2Cl_2$  (2 mL) was stirred at room temperature for 15 min. Water was added and the mixture was extracted with EtOAc ( $\times 3$ ). The combined EtOAc extracts were washed with  $H_2O$  ( $\times 2$ ), brine ( $\times 3$ ), then dried and evaporated under reduced pressure. The resulting red solid was stirred in HCl(g)-saturated dioxane (5 mL) for 30 min then evaporated under reduced pressure. 5,6,7-Trimethoxyindole-2-carboxylic acid (34 mg, 0.137 mmol), EDCI (87 mg, 0.456 mmol), and DMA (3 mL) were added and the mixture was stirred at room temperature under nitrogen for 15 h. The mixture was partitioned between EtOAc and ice-cold 5% aq  $KHCO_3$ . The aqueous portion was extracted with cold EtOAc ( $\times 4$ ) and the combined extracts were washed with  $H_2O$  ( $\times 3$ ), brine ( $\times 2$ ) and dried. Addition of  $Et_2O$  gave a precipitate of **17** (43 mg, 66%) as a red powder: mp 264-266 °C (dec.);  $^1H$  NMR [ $(CD_3)_2SO$ ]  $\delta$  11.60 (s, 1 H), 9.21 (s, 1 H), 8.54 (d,  $J = 9.4$  Hz, 1 H), 8.53 (d,  $J = 2.3$  Hz, 1 H), 8.04 (dd,  $J = 9.2, 1.8$  Hz, 1 H), 7.64 (s, 2 H), 7.19 (d,  $J = 1.9$  Hz, 1 H), 6.98 (s, 1

H), 4.94 (dd,  $J = 11.1, 9.9$  Hz, 1 H), 4.70-4.60 (m, 2 H), 4.17 (dd,  $J = 11.4, 3.4$  Hz, 1 H), 4.08 (dd,  $J = 11.4, 5.8$  Hz, 1 H), 3.94 (s, 3 H), 3.83 (s, 3 H), 3.81 (s, 3 H). HRMS (FAB) calcd. for  $C_{25}H_{23}^{35}ClN_4O_8S$  ( $MH^+$ ) 575.1003, found 575.0989. Anal. ( $C_{25}H_{23}ClN_4O_8S \cdot \frac{1}{2}EtOAc$ ) C, H, N.

**1-(Chloromethyl)-3-{5-[2-(dimethylamino)ethoxy]indol-2-carbonyl}-5-nitro-1,2-dihydro-3H-benzo[*e*]indole-8-sulfonamide (**34**).** A solution of **145** (50 mg, 0.114 mmol) and  $Cs_2CO_3$  (58 mg, 0.172 mmol) in MeOH (2 mL), THF (2 mL), and  $CH_2Cl_2$  (2 mL) was stirred at room temperature for 15 min. Water was added and the mixture was extracted with EtOAc ( $\times 3$ ). The combined EtOAc extracts were washed with  $H_2O$  ( $\times 2$ ), brine ( $\times 3$ ), then dried and evaporated under reduced pressure. The resulting red solid was stirred in HCl(g)-saturated dioxane (5 mL) for 30 min then evaporated under reduced pressure. 5-[2-(Dimethylamino)ethoxy]indole-2-carboxylic acid hydrochloride (39 mg, 0.137 mmol), EDCI (87 mg, 0.456 mmol), and DMA (3 mL) were added and the mixture was stirred at room temperature under nitrogen for 15 h. The mixture was partitioned between  $CH_2Cl_2$  and ice-cold 5% aq  $KHCO_3$ . The aqueous portion was extracted with cold  $CH_2Cl_2$  ( $\times 4$ ) and the combined extracts were washed with  $H_2O$  ( $\times 3$ ), brine ( $\times 2$ ) and dried. Addition of  $Et_2O$  gave a precipitate of **34** (43 mg, 66%) as an orange powder: mp 260-265 °C (dec.);  $^1H$  NMR [ $(CD_3)_2SO$ ]  $\delta$  11.71 (d,  $J = 1.7$  Hz, 1 H), 9.26 (s, 1 H), 8.55 (d,  $J = 8.9$  Hz, 1 H), 8.53 (d,  $J = 2.1$  Hz, 1 H), 8.04 (dd,  $J = 9.3, 1.7$  Hz, 1 H), 7.64 (s, 2 H), 7.42 (d,  $J = 8.9$  Hz, 1 H), 7.19 (dd,  $J = 10.2, 1.7$  Hz, 2 H), 6.95 (dd,  $J = 8.9, 2.4$  Hz, 1 H), 4.98 (dd,  $J = 10.1, 9.6$  Hz, 1 H), 4.72 (dd,  $J = 11.0, 2.4$  Hz, 1 H), 4.71-4.63 (m, 1 H), 4.18 (dd,  $J = 11.5, 3.4$  Hz, 1 H), 4.10 (dd,  $J = 11.4, 5.9$  Hz, 1 H), 4.08 (t,  $J = 5.9$  Hz, 2 H), 2.66 (t,  $J = 5.8$  Hz, 2 H), 2.24 (s, 6 H). HRMS (FAB) calcd. for  $C_{26}H_{26}^{35}ClN_5O_6S$  ( $MH^+$ )  $m/z$  572.1371, found 572.1362. Anal. ( $C_{26}H_{26}ClN_5O_6S \cdot \frac{1}{2}H_2O$ ) C, H, N.

### Synthesis of 35.

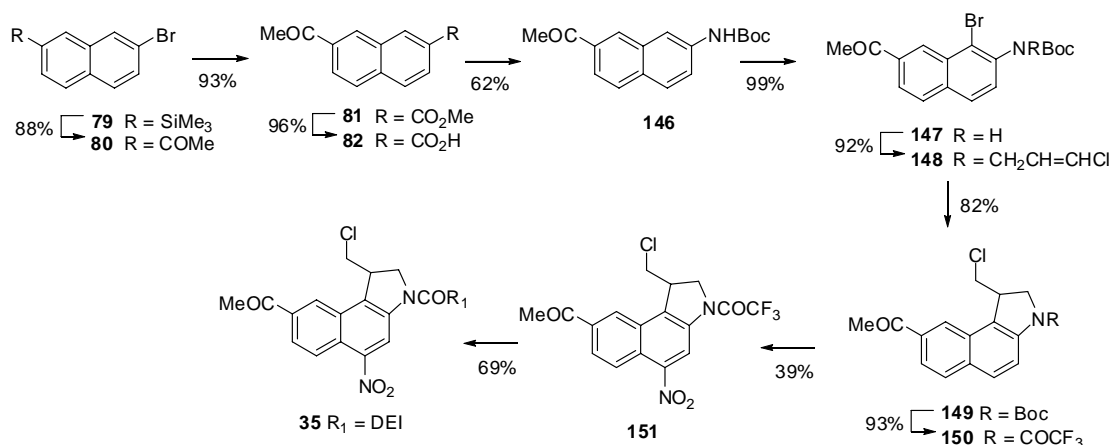

**2-Acetyl-7-bromonaphthalene (80).** A solution of Ac<sub>2</sub>O (340 mg, 3.35 mmol) in CH<sub>2</sub>Cl<sub>2</sub> (2.5 mL) was added dropwise to a suspension of AlCl<sub>3</sub> (490 mg, 3.66 mmol, 99.99%) in CH<sub>2</sub>Cl<sub>2</sub> (15 mL) at 0 °C. A solution of 7-bromo-2-(trimethylsilyl)naphthalene (**79**)<sup>5</sup> (850 mg, 3.05 mmol) in CH<sub>2</sub>Cl<sub>2</sub> (2.5 mL) was added dropwise. After 15 min, the mixture was poured into ice water and extracted with CH<sub>2</sub>Cl<sub>2</sub> (×3). The combined organic extracts were washed with brine and dried. Filtration through Celite followed by chromatography eluting with petroleum ether/EtOAc (95:5 then 4:1) gave **80** (120 mg, 88%) as a colorless solid; <sup>1</sup>H NMR (CDCl<sub>3</sub>) δ 8.36 (d, *J* = 0.9 Hz, 1 H), 8.13 (d, *J* = 1.7 Hz, 1 H), 8.04 (dd, *J* = 8.6, 1.7 Hz, 1 H), 7.87 (d, *J* = 8.6 Hz, 1 H), 7.75 (d, *J* = 8.7 Hz, 1 H), 7.67 (dd, *J* = 8.7, 1.9 Hz, 1 H), 2.72 (s, 3 H) (identical to that reported<sup>6</sup>).

**Methyl 7-acetyl-2-naphthoate (81).** A mixture of **80** (750 mg, 3.01 mmol), Pd(OAc)<sub>2</sub> (68 mg, 0.30 mmol), 1,3-bis(diphenylphosphino)propane (124 mg, 0.30 mmol), MeOH (10 mL), Et<sub>3</sub>N (5 mL) and DMSO (5 mL) were placed in a Berghof reactor (HR-200) and purged with CO(g) for 5 min. The reactor was then pressurized with CO(g) (25 bar) and heated at 70 °C for 15 h. After cooling, EtOAc was added and the mixture was filtered through Celite/silica gel. Solvents were removed under reduced pressure, and CH<sub>2</sub>Cl<sub>2</sub> and water were added. The mixture was extracted with CH<sub>2</sub>Cl<sub>2</sub> (×3) and the combined organic extracts were washed with brine and dried. Filtration through silica gel, followed by chromatography eluting with petroleum ether/EtOAc (4:1 then 1:1 then 2:3) gave **81** (640 mg, 93%) as a white solid. A sample was recrystallized from petroleum ether/CH<sub>2</sub>Cl<sub>2</sub>: mp 103-105 °C; <sup>1</sup>H NMR (CDCl<sub>3</sub>) δ 8.72 (s, 1 H), 8.55 (s, 1 H), 8.18 (dd, *J* = 8.6, 1.7 Hz, 1 H), 8.13 (dd, *J* = 8.6, 1.7 Hz, 1 H), 7.93 (d, *J* = 8.6 Hz, 1 H), 7.92 (d, *J* = 8.6 Hz, 1 H), 4.00 (s, 3 H), 2.74 (s, 3 H); <sup>13</sup>C NMR δ 197.5, 166.7, 137.5, 135.2, 132.4, 131.8, 131.3, 128.5, 128.3, 128.1, 127.8, 126.2, 52.4, 26.6. Anal. (C<sub>14</sub>H<sub>12</sub>O<sub>3</sub>) C, H.

**7-Acetyl-2-naphthoic acid (82).** A solution of KOH (570 mg, 10 mmol) in water (3.5 mL) was added dropwise to a cooled solution of **81** (640 mg, 2.81 mmol) in MeOH (10 mL) and CH<sub>2</sub>Cl<sub>2</sub> (10 mL) at 0 °C. After allowing the mixture to warm to room temperature and stirring for 96 h, excess CH<sub>2</sub>Cl<sub>2</sub> and water were added. The aqueous portion was acidified (pH 2) with 2N HCl and the resulting white precipitate was extracted with EtOAc (×2). The combined EtOAc extracts were washed with

water, brine, and dried, to give **82** (575 mg, 96%) as a colorless solid. A sample was recrystallized from petroleum ether/CH<sub>2</sub>Cl<sub>2</sub>/Et<sub>2</sub>O: mp 224-228 °C; <sup>1</sup>H NMR (CDCl<sub>3</sub>) δ (CO<sub>2</sub>H not observed) 8.82 (s, 1 H), 8.60 (s, 1 H), 8.23 (dd, *J* = 8.6, 1.6 Hz, 1 H), 8.18 (dd, *J* = 8.7, 1.7 Hz, 1H), 7.97 (d, *J* = 8.7 Hz, 2 H), 2.76 (s, 3 H). Anal. (C<sub>13</sub>H<sub>10</sub>O<sub>3</sub>) C, H.

***tert*-Butyl 7-acetyl-2-naphthylcarbamate (146).** A solution of **82** (550 mg, 2.57 mmol), DPPA (850 mg, 3.08 mmol) and Et<sub>3</sub>N (570 mg, 5.65 mmol) in *t*-BuOH (20 mL) was heated under reflux for 15 h. The mixture was poured into EtOAc and filtered through Celite. Chromatography on silica gel eluting with petroleum ether/CH<sub>2</sub>Cl<sub>2</sub>/EtOAc (8:1:1) gave **146** (451 mg, 62%) as a colorless solid: mp (EtOAc) 161-163 °C; <sup>1</sup>H NMR (CDCl<sub>3</sub>) δ 8.38 (br s, 1 H), 8.16 (br s, 1 H), 7.91 (dd, *J* = 8.5, 1.7 Hz, 1 H), 7.80 (d, *J* = 8.6 Hz, 1 H), 7.78 (d, *J* = 8.8 Hz, 1 H), 7.43 (dd, *J* = 8.8, 2.2 Hz, 1 H), 6.68 (br s, 1 H), 2.70 (s, 3 H), 1.55 (s, 9 H); <sup>13</sup>C NMR δ 198.2, 152.7, 136.7, 135.0, 133.2, 132.0, 129.7, 128.5, 128.0, 122.4, 121.6, 115.8, 81.0, 28.3, 26.6. Anal. (C<sub>17</sub>H<sub>19</sub>NO<sub>3</sub>) C, H, N.

***tert*-Butyl 7-acetyl-1-bromo-2-naphthylcarbamate (147).** A mixture of **146** (420 mg, 1.47 mmol), NBS (292 mg, 1.62 mmol) and K<sub>2</sub>CO<sub>3</sub> (244 mg, 1.77 mmol) in MeCN (10 mL) was heated at 40 °C under N<sub>2</sub> for 30 min then concentrated under reduced pressure. EtOAc and water were added to the residue, and the EtOAc portion was washed with water, brine and dried to give **147** (530 mg, 99%) as a colorless solid: mp (petroleum ether/EtOAc) 114-117 °C; <sup>1</sup>H NMR (CDCl<sub>3</sub>) δ 8.70 (s, 1 H), 8.50 (d, *J* = 9.0 Hz, 1 H), 7.97 (dd, *J* = 8.5, 1.6 Hz, 1 H), 7.84 (d, *J* = 8.8 Hz, 1 H), 7.81 (d, *J* = 9.6 Hz, 1 H), 7.34 (br s, 1 H), 2.76 (s, 3 H), 1.58 (s, 9 H); <sup>13</sup>C NMR δ 197.9, 152.4, 136.0, 135.8, 133.0, 131.5, 128.7, 128.5, 128.0, 123.1, 122.0, 111.0, 81.6, 28.3, 26.7. Anal. (C<sub>17</sub>H<sub>18</sub>BrNO<sub>3</sub>) C, H, N.

***tert*-Butyl 7-acetyl-1-bromo-2-naphthyl-(3-chloro-2-propen-1-yl)carbamate (148).** NaH (7 mg, 0.17 mmol, 60% in oil) was added to a solution of **147** (50 mg, 0.14 mmol) in DMF (3 mL) at -40 °C. 1,3-Dichloropropene (25 mg, 0.21 mmol) was added and the mixture was allowed to warm to room temperature over 1 h, then concentrated under reduced pressure. CH<sub>2</sub>Cl<sub>2</sub> and water were added and the organic layer was washed with water, brine and dried. Chromatography eluting with petroleum ether/EtOAc (4:1) gave **148** (55 mg, 92%) as a yellow oil; <sup>1</sup>H NMR (CDCl<sub>3</sub>) (mixture of rotamers and E and Z forms) δ 8.94 (s, 1 H), 8.13-8.07 (m, 1 H), 7.94-7.79 (m, 2 H), 7.50-7.35 (m, 1 H), 6.15-6.02 (m, 2 H), 4.66-4.28, 4.02-3.91 (2 m, 2 H), 2.78 (s, 3 H), 1.34 (s, 9 H). HRMS (CI) calcd. for C<sub>20</sub>H<sub>21</sub><sup>79</sup>Br<sup>35</sup>ClNO<sub>3</sub> (MH<sup>+</sup>) *m/z* 438.0472, found 438.0460.

***tert*-Butyl 8-acetyl-1-(chloromethyl)-1,2-dihydro-3*H*-benzo[*e*]indole-3-carboxylate (149).** A mixture of **148** (470 mg, 1.07 mmol), Bu<sub>3</sub>SnH (380 mg, 1.29 mmol) and AIBN (18 mg, 0.11 mmol) in benzene (10 mL) was heated under reflux for 15 h, then concentrated under reduced pressure. EtOAc and water were added and the EtOAc portion was washed with water (×2), brine, and dried. Chromatography eluting with petroleum ether/EtOAc (4:1) followed by recrystallization (MeOH) gave **149** (320 mg, 82%) as colorless needles: mp 98-100 °C; <sup>1</sup>H NMR (CDCl<sub>3</sub>) δ 8.34 (s, 1 H), 8.26 (br s, 1 H), 7.91-7.84 (m, 2 H), 7.81 (d, *J* = 8.9 Hz, 1 H), 4.36-4.28 (m, 1 H), 4.21-4.09 (m, 2 H), 3.97-3.90 (m, 1 H), 3.59-3.51 (m, 1 H), 2.72 (s, 3 H), 1.61 (s, 9 H); <sup>13</sup>C NMR δ (one C not observed) 198.0, 142.4, 135.4, 132.2, 129.7, 129.5, 129.2, 123.6, 122.2, 119.1, 118.2, 68.2, 52.7, 46.5, 28.5, 26.9, 25.2. Anal. (C<sub>20</sub>H<sub>22</sub>ClNO<sub>3</sub>) C, H, N.



**8-Acetyl-1-(chloromethyl)-3-(trifluoroacetyl)-1,2-dihydro-3H-benzo[e]indole (150).** A solution of **149** (100 mg, 0.28 mmol) in HCl(g) saturated dioxane (10 mL) was stirred for 4 h. The solvent was removed under reduced pressure to give the crude amine hydrochloride (82 mg, 0.26 mmol, 100%). This was immediately dissolved in pyridine (5 mL), cooled (0 °C) and treated with TFAA (88 mg, 0.42 mmol). After 1 h, the mixture was poured into ice water and extracted with CH<sub>2</sub>Cl<sub>2</sub> (×3). The combined organic extracts were washed with aqueous HCl (1N, ×3), water, brine, and dried. Chromatography eluting with petroleum ether/EtOAc (1:1) gave **150** (92 mg, 93%) as a colorless solid: mp (petroleum ether/Et<sub>2</sub>O) 161-163 °C; <sup>1</sup>H NMR (CDCl<sub>3</sub>) δ 8.55 (d, *J* = 9.0 Hz, 1 H), 8.41 (s, 1 H), 8.02-7.95 (m, 2 H), 7.92 (d, *J* = 9.0 Hz, 1 H), 4.68 (dt, *J* = 11.5, 1.4 Hz, 1 H), 4.47 (dd, *J* = 11.4, 8.6 Hz, 1 H), 4.34-4.26 (m, 1 H), 3.98 (dd, *J* = 11.5, 3.5 Hz, 1 H), 3.63 (dd, *J* = 11.5, 8.9 Hz, 1 H), 2.74 (s, 3 H); <sup>13</sup>C NMR δ 197.7, 154.6 (q, *J*<sub>C-F</sub> 37.8 Hz), 140.9, 135.8, 134.0, 130.2, 129.7, 128.6, 127.1, 124.0, 123.8, 119.5, 116.1 (q, *J*<sub>C-F</sub> 288 Hz), 52.6 (q, *J*<sub>C-F</sub> 4.1 Hz), 45.7, 42.7, 26.9. Anal. (C<sub>17</sub>H<sub>13</sub>ClF<sub>3</sub>NO<sub>2</sub>) C, H, N.

**8-Acetyl-1-(chloromethyl)-5-nitro-3-(trifluoroacetyl)-1,2-dihydro-3H-benzo[e]indole (151).** Solid **150** (57 mg, 0.16 mmol) was dissolved in cH<sub>2</sub>SO<sub>4</sub> (5 mL) at 0 °C, then treated dropwise with a cold (0 °C) solution of KNO<sub>3</sub> (16 mg, 0.16 mmol) in cH<sub>2</sub>SO<sub>4</sub> (0.5 mL). After 15 min, the mixture was poured into ice water and extracted with CH<sub>2</sub>Cl<sub>2</sub> (×6). The combined organic extracts were washed with water (×2), brine, and dried. Chromatography eluting with petroleum ether/EtOAc (7:3) gave **151** (25 mg, 39%) as an orange powder: mp (petroleum ether/EtOAc) 196-198 °C; <sup>1</sup>H NMR (CDCl<sub>3</sub>) δ 9.23 (s, 1H), 8.58 (d, *J* = 9.1 Hz, 1 H), 8.49 (d, *J* = 1.3 Hz, 1 H), 8.17 (dd, *J* = 9.1, 1.6 Hz, 1 H), 4.73 (d, *J* = 11.5 Hz, 1 H), 4.56 (dd, *J* = 11.4, 8.8 Hz, 1 H), 4.47-4.39 (m, 1 H), 3.98 (dd, *J* = 11.6, 3.6 Hz, 1 H), 3.77 (dd, *J* = 11.6, 7.8 Hz, 1 H), 2.78 (s, 3 H). Anal. (C<sub>17</sub>H<sub>12</sub>ClF<sub>3</sub>N<sub>2</sub>O<sub>4</sub>) C, H, N.

**8-Acetyl-1-(chloromethyl)-3-{5-[2-(dimethylamino)ethoxy]indol-2-carbonyl}-5-nitro-1,2-dihydro-3H-benzo[e]indole (35).** A solution of **151** (45 mg, 0.11 mmol) and Cs<sub>2</sub>CO<sub>3</sub> (38 mg, 0.11 mmol) in MeOH (3 mL) and CH<sub>2</sub>Cl<sub>2</sub> (6 mL) was stirred for 15 min. Water was added and the mixture was extracted with EtOAc (×3). The combined EtOAc extracts were washed with water (×2), brine (×3), dried, and evaporated. The residue was dissolved in HCl(g) saturated dioxane (5 mL) and stirred for 1 h. The dioxane was evaporated to give 8-acetyl-1-(chloromethyl)-5-nitro-1,2-dihydro-3H-benzo[e]indole hydrochloride (38 mg, 100%): mp >300 °C; <sup>1</sup>H NMR [(CD<sub>3</sub>)<sub>2</sub>SO] δ (two H not observed) 8.42 (d, *J* = 1.3 Hz, 1 H), 8.19 (d, *J* = 9.1 Hz, 1 H), 7.80 (dd, *J* = 9.1, 1.7 Hz, 1 H), 7.77 (s, 1 H), 4.41-4.33 (m, 1 H), 3.96 (dd, *J* = 11.0, 4.1 Hz, 1 H), 3.85 (t, *J* = 10.1 Hz, 1 H), 3.77 (dd, *J* = 11.0, 2.6 Hz, 1 H), 3.73 (dd, *J* = 10.3, 2.7 Hz, 1 H), 2.74 (s, 3 H); <sup>13</sup>C NMR δ 197.9, 150.0, 147.1, 135.3, 130.0, 127.1, 124.3, 123.6, 121.6, 119.8, 111.0, 50.8, 46.6, 42.7, 26.8. This material was used directly in the next step.

A mixture of the amine hydrochloride (35 mg, 0.10 mmol), 5-[2-(dimethylamino)ethoxy]indole-2-carboxylic acid hydrochloride (35 mg, 0.12 mmol) and EDCI (79 mg, 0.41 mmol) in DMA (3 mL) was stirred under a N<sub>2</sub> atmosphere for 15 h. The mixture was then partitioned between CH<sub>2</sub>Cl<sub>2</sub> and cold (0 °C) 5% aq KHCO<sub>3</sub>. The aqueous portion was extracted with cold CH<sub>2</sub>Cl<sub>2</sub> (×4) and the combined extracts were washed with water (×3), brine (×2) and dried. The

solvent was evaporated and the residue was dissolved in CH<sub>2</sub>Cl<sub>2</sub>/MeOH and solvents were evaporated until precipitation began. The precipitate was filtered off and washed with MeOH to give **35** (38 mg, 69%) as an orange powder: mp 210-215°C; <sup>1</sup>H NMR [(CD<sub>3</sub>)<sub>2</sub>SO] δ 11.71 (s, 1 H), 9.26 (s, 1 H), 8.73 (s, 1 H), 8.45 (d, *J* = 9.1 Hz, 1 H), 8.12 (dd, *J* = 9.1, 1.5 Hz, 1 H), 7.41 (d, *J* = 8.9 Hz, 1 H), 7.22 (d, *J* = 1.4 Hz, 1 H), 7.18 (d, *J* = 2.2 Hz, 1 H), 6.95 (dd, *J* = 8.9, 2.4 Hz, 1 H), 4.97 (t, *J* = 10.1 Hz, 1 H), 4.87-4.78 (m, 1 H), 4.74 (dd, *J* = 10.8, 2.0 Hz, 1 H), 4.22-4.12 (m, 2 H), 4.08 (t, *J* = 5.9 Hz, 2 H), 2.81 (s, 3 H), 2.66 (t, *J* = 5.8 Hz, 2 H), 2.25 (s, 6 H); <sup>13</sup>C NMR δ 197.7, 160.5, 153.0, 146.3, 141.5, 135.6, 133.9, 131.9, 129.8, 129.0, 127.4, 125.7, 125.2, 123.9, 123.4, 116.4, 116.3, 113.2, 106.1, 103.2, 66.1, 57.6, 54.7, 48.1, 45.3, 41.2, 27.0. Anal. (C<sub>28</sub>H<sub>27</sub>ClN<sub>4</sub>O<sub>5</sub>·½H<sub>2</sub>O) C, H, N.

### Synthesis of 36.

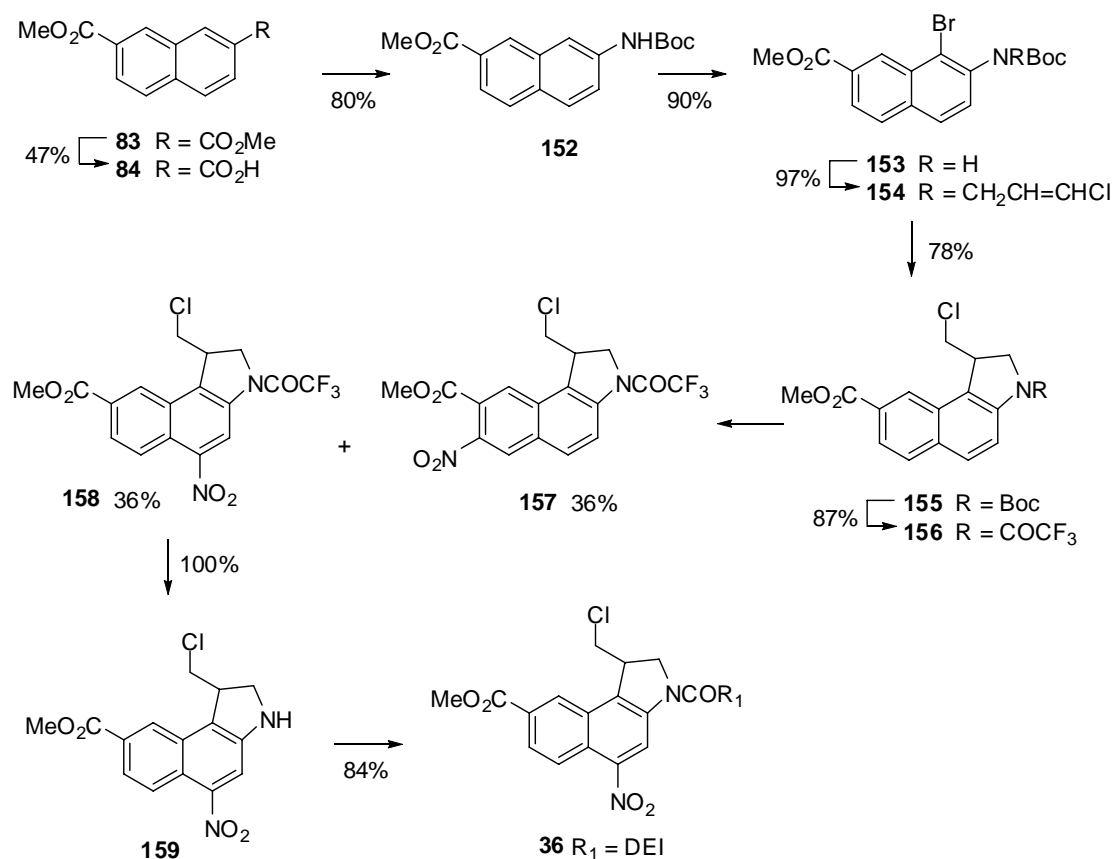

**7-(Methoxycarbonyl)-2-naphthoic acid (84).** A solution of KOH (340 mg, 6.17 mmol) in MeOH (8 mL) and water (1 mL) was added dropwise to a solution of dimethyl 2,7-naphthalenedicarboxylate (**83**)<sup>7</sup> (1.52 g, 6.23 mmol) in MeOH (8 mL) and CH<sub>2</sub>Cl<sub>2</sub> (8 mL). After 20 h, more CH<sub>2</sub>Cl<sub>2</sub> and water were added, and the separated aqueous phase was acidified (pH 2) with 2N HCl. The resulting white precipitate was filtered off, washed with water, and dried in a vacuum desiccator. Chromatography eluting with CH<sub>2</sub>Cl<sub>2</sub>/MeOH (9:1 then 4:1) gave recovered **83** (0.50 g, 33%) and **84** (672 mg, 47%) as colorless crystals: mp (MeOH) 262-264 °C; <sup>1</sup>H NMR [(CD<sub>3</sub>)<sub>2</sub>SO] δ 13.0 (br s, 1 H), 8.802 (s, 1 H), 8.796 (s, 1 H), 8.17-8.05 (m, 4 H), 3.95 (s, 3 H); <sup>13</sup>C NMR δ (one C not observed) 167.0, 166.0, 136.8, 131.8, 131.3, 129.2, 128.3, 128.1, 127.7, 127.6, 126.9, 52.3. Anal. (C<sub>13</sub>H<sub>10</sub>O<sub>4</sub>) C, H.

**Methyl 7-[(*tert*-butoxycarbonyl)amino]-2-naphthoate (152).** A solution of acid **84** (50 mg, 0.22 mmol), DPPA (72 mg, 0.26 mmol) and Et<sub>3</sub>N (48 mg, 0.48 mmol) in *t*-BuOH (5 mL) was heated under reflux for 20 h. The solvents were removed under reduced pressure and the residue was purified by chromatography eluting with CH<sub>2</sub>Cl<sub>2</sub>/MeOH (49:1) followed by recrystallization (EtOAc/petroleum ether) to give **152** (52 mg, 80%) as colorless needles. A sample was recrystallized: mp (CH<sub>2</sub>Cl<sub>2</sub>/*n*-hexane) 181-183 °C; <sup>1</sup>H NMR (CDCl<sub>3</sub>) δ 8.52 (br s, 1 H), 8.05 (br s, 1 H), 7.94 (dd, *J* = 8.5, 1.7 Hz, 1 H), 7.79 (d, *J* = 8.7 Hz, 2 H), 7.51 (dd, *J* = 8.8, 2.1 Hz, 1 H), 6.67 (br s, 1 H), 3.97 (s, 3 H), 1.56 (s, 9

H);  $^{13}\text{C}$  NMR  $\delta$  167.3, 152.7, 136.6, 133.1, 132.0, 130.4, 128.6, 127.9, 127.8, 123.8, 121.5, 115.6, 80.9, 52.2, 28.3. Anal. ( $\text{C}_{17}\text{H}_{19}\text{NO}_4$ ) C, H, N.

**Methyl 8-bromo-7-[(*tert*-butoxycarbonyl)amino]-2-naphthoate (153).** A mixture of **152** (50 mg, 0.17 mmol), NBS (33 mg, 0.18 mmol) and  $\text{K}_2\text{CO}_3$  (28 mg, 0.20 mmol) in MeCN (3 mL) was heated at 60 °C under  $\text{N}_2$  for 30 min. The solvent was removed under reduced pressure and the residue was purified by chromatography eluting with petroleum ether/EtOAc (9:1) followed by recrystallization (petroleum ether) to give **153** (57 mg, 90%) as colorless crystals: mp 137-140 °C;  $^1\text{H}$  NMR ( $\text{CDCl}_3$ )  $\delta$  8.89 (d,  $J$  = 1.2 Hz, 1 H), 8.49 (d,  $J$  = 9.1 Hz, 1 H), 8.01 (dd,  $J$  = 8.6, 1.7 Hz, 1 H), 7.83 (d,  $J$  = 8.6 Hz, 1 H), 7.82 (d,  $J$  = 9.0 Hz, 1 H), 7.35 (br s, 1 H), 4.00 (s, 3 H), 1.57 (s, 9 H). Anal. ( $\text{C}_{17}\text{H}_{18}\text{BrNO}_4$ ) C, H, N, Br.

**Methyl 8-bromo-7-[(*tert*-butoxycarbonyl)(3-chloro-2-propen-1-yl)amino]-2-naphthoate (154).** NaH (57 mg, 1.42 mmol, 60% in oil) was added to a solution of **153** (450 mg, 1.18 mmol) in DMF (5 mL) at 0 °C. 1,3-Dichloropropene (260 mg, 2.37 mmol) was added and the mixture was allowed to warm to room temperature over 1 h, then concentrated under reduced pressure.  $\text{CH}_2\text{Cl}_2$  and water were added and the organic phase was washed with water ( $\times 2$ ), brine ( $\times 2$ ), dried, and filtered through silica gel to give **154** (520 mg, 97%) as a yellow oil;  $^1\text{H}$  NMR ( $\text{CDCl}_3$ ) (mixture of rotamers and E and Z forms)  $\delta$  9.07 (s, 1 H), 8.18-8.08 (m, 1 H), 7.93-7.78 (m, 2 H), 7.42-7.32 (m, 1 H), 6.15-5.98 (m, 2 H), 4.01 (s, 3 H), 4.63-4.48 (m, 2 H), 1.26, 1.24 (2s, 9 H). HRMS (FAB) calcd. for  $\text{C}_{20}\text{H}_{21}^{79}\text{Br}^{35}\text{ClNO}_4$  ( $\text{MH}^+$ )  $m/z$  454.0421, found 454.0421.

**8-Methyl 3-(*tert*-butoxycarbonyl)-1-(chloromethyl)-1,2-dihydro-3H-benzo[e]indole-8-carboxylate (155).** A mixture of **154** (500 mg, 1.10 mmol),  $\text{Bu}_3\text{SnH}$  (350 mg, 1.21 mmol) and AIBN (19 mg, 0.11 mmol) in benzene (8 mL) was heated under reflux for 1.5 h. The benzene was removed under reduced pressure, the residue was triturated with pentane, and the solid obtained was recrystallized (MeOH) to give **155** (369 mg, 78%) as colorless needles: mp 143-145 °C;  $^1\text{H}$  NMR ( $\text{CDCl}_3$ )  $\delta$  8.45 (s, 1 H), 8.31 (br s, 1 H), 7.93 (dd,  $J$  = 8.6, 1.5 Hz, 1 H), 7.87 (d,  $J$  = 8.6 Hz, 1 H), 7.82 (d,  $J$  = 8.9 Hz, 1 H), 4.36-4.27 (m, 1 H), 4.20-4.08 (m, 2 H), 4.00 (s, 3 H), 3.99-3.92 (m, 1 H), 3.57-3.48 (m, 1 H), 1.61 (s, 9 H);  $^{13}\text{C}$  NMR  $\delta$  167.1, 152.4, 142.0, 132.1, 129.6, 129.2, 129.0, 128.4, 124.9, 124.1, 123.2, 118.0, 81.4, 52.6, 52.3, 46.5, 41.6, 28.4. Anal. ( $\text{C}_{20}\text{H}_{22}\text{ClNO}_4$ ) C, H, N, Cl.

**Methyl 1-(chloromethyl)-3-(trifluoroacetyl)-1,2-dihydro-3H-benzo[e]indole-8-carboxylate (156).** A solution of **155** (200 mg, 0.53 mmol) in HCl(g) saturated dioxane (10 mL) was stirred for 4 h, then evaporated, to give the amine hydrochloride (169 mg, 100%). A cold (0 °C) solution of this (85 mg, 0.27 mmol) in pyridine (4 mL) was treated with TFAA (66 mg, 0.32 mmol). After 30 min at 0 °C, the mixture was poured into ice water and extracted with  $\text{CH}_2\text{Cl}_2$  ( $\times 3$ ). The combined organic extracts were washed with HCl (1N,  $\times 2$ ), water, brine, and dried. Chromatography eluting with petroleum ether/EtOAc/ $\text{CH}_2\text{Cl}_2$  (7:2:1 then 8:1:1) followed by trituration with *n*-hexane gave **156** (88 mg, 87%) as colorless crystals: mp 161-163 °C;  $^1\text{H}$  NMR ( $\text{CDCl}_3$ )  $\delta$  8.55 (d,  $J$  = 9.0 Hz, 1 H), 8.52 (s, 1 H), 8.07 (dd,  $J$  = 8.6, 1.5 Hz, 1 H), 7.95 (d,  $J$  = 8.6 Hz, 1 H), 7.92 (d,  $J$  = 9.0 Hz, 1 H), 4.68 (dt,  $J$  = 11.5, 1.4 Hz, 1 H), 4.45 (dd,  $J$  = 11.4, 8.6 Hz, 1 H), 4.32-4.27 (m, 1 H), 4.02 (s, 3 H), 4.00 (dd,  $J$  = 11.6, 3.3 Hz, 1 H), 3.62 (dd,  $J$  = 11.5, 9.2 Hz, 1 H);  $^{13}\text{C}$  NMR  $\delta$  166.7, 154.8 (q,  $J_{\text{C-F}}$  37.4 Hz),

140.7, 134.0, 130.2, 129.4, 129.1, 128.4, 126.8, 125.4, 125.0, 119.4, 116.0 (q,  $J_{\text{C-F}}$  288 Hz), 76.7, 52.6 (q,  $J_{\text{C-F}}$  4.0 Hz), 45.7, 42.6. Anal. ( $\text{C}_{17}\text{H}_{13}\text{ClF}_3\text{NO}_3$ ) C, H, N.

**Methyl 1-(chloromethyl)-5-nitro-3-(trifluoroacetyl)-1,2-dihydro-3H-benzo[e]indole-8-carboxylate (158).** Cold (0 °C)  $\text{CH}_2\text{SO}_4$  (8 mL) was added to cooled (0 °C) **156** (350 mg, 0.94 mmol). A cooled (0 °C) solution of  $\text{KNO}_3$  (95 mg, 0.94 mmol) in 98%  $\text{H}_2\text{SO}_4$  (0.5 mL) was then added dropwise. After 15 min, the mixture was poured into ice water and extracted with  $\text{CH}_2\text{Cl}_2$  ( $\times 3$ ). The combined  $\text{CH}_2\text{Cl}_2$  extracts were washed with water ( $\times 2$ ), brine and dried. Chromatography eluting with EtOAc/petroleum ether (4:1) gave methyl 1-(chloromethyl)-7-nitro-3-(trifluoroacetyl)-1,2-dihydro-3H-benzo[e]indole-8-carboxylate (**157**) (136 mg, 36%) as a brown powder: mp ( $\text{CH}_2\text{Cl}_2/\text{MeOH}$ ) 165-168 °C;  $^1\text{H}$  NMR ( $\text{CDCl}_3$ )  $\delta$  8.69 (d,  $J = 9.0$  Hz, 1 H), 8.53 (s, 1 H), 8.13 (s, 1 H), 8.07 (d,  $J = 9.0$  Hz, 1 H), 4.69 (d,  $J = 11.5$  Hz, 1 H), 4.52 (dd,  $J = 11.5, 8.6$  Hz, 1 H), 4.32-4.25 (m, 1 H), 3.99 (s, 3 H), 3.95 (dd,  $J = 11.6, 3.5$  Hz, 1 H), 3.66 (dd,  $J = 11.6, 8.5$  Hz, 1 H);  $^{13}\text{C}$  NMR  $\delta$  165.9, 154.9 (q,  $J_{\text{C-F}}$  38.4 Hz), 144.8, 143.8, 132.1, 131.0, 130.0, 126.7, 126.11, 126.05, 125.7, 120.7, 115.8 (q,  $J_{\text{C-F}}$  288 Hz), 53.5, 52.8, 45.6, 42.3. Anal. ( $\text{C}_{17}\text{H}_{12}\text{ClF}_3\text{N}_2\text{O}_5 \cdot \frac{1}{4}\text{EtOAc}$ ) C, H, N.

Further elution gave **158** (140 mg, 36%) as a cream powder. A sample was triturated with MeOH to give colorless crystals: mp 243-245 °C;  $^1\text{H}$  NMR [ $(\text{CD}_3)_2\text{SO}$ ]  $\delta$  9.09 (s, 1 H), 8.75 (d,  $J = 1.2$  Hz, 1 H), 8.51 (d,  $J = 9.2$  Hz, 1 H), 8.22 (dd,  $J = 9.1, 1.6$  Hz, 1 H), 4.86-4.79 (m, 1 H), 4.68-4.61 (m, 1 H), 4.55-4.49 (m, 1 H), 4.19 (dd,  $J = 11.5, 3.5$  Hz, 1 H), 4.08 (dd,  $J = 11.5, 5.5$  Hz, 1 H), 3.97 (s, 3 H);  $^{13}\text{C}$  NMR  $\delta$  165.5, 150.3, 146.6, 139.3, 139.2, 134.8, 129.6, 128.7, 127.5, 126.3, 124.5, 123.0, 116.0, 52.8, 52.7, 47.6, 40.9. Anal. ( $\text{C}_{17}\text{H}_{12}\text{ClF}_3\text{N}_2\text{O}_5$ ) C, H, N.

**Methyl 1-(chloromethyl)-5-nitro-1,2-dihydro-3H-benzo[e]indole-8-carboxylate (159).** A solution of **158** (100 mg, 0.24 mmol) and  $\text{Cs}_2\text{CO}_3$  (312 mg, 0.96 mmol) in MeOH (10 mL) and  $\text{CH}_2\text{Cl}_2$  (15 mL) was stirred for 1.5 h. Water was added and the mixture was extracted with  $\text{CH}_2\text{Cl}_2$  ( $\times 3$ ). The combined organic extracts were washed with water, brine and dried. The solvent was evaporated and the residue was dissolved in  $\text{CH}_2\text{Cl}_2/\text{MeOH}$  and solvents were evaporated under reduced pressure until precipitation began. The precipitate was filtered off and washed with MeOH to give **159** (76 mg, 100%): mp 161-163 °C;  $^1\text{H}$  NMR [ $(\text{CD}_3)_2\text{SO}$ ]  $\delta$  8.40 (dd,  $J = 1.6, 0.6$  Hz, 1 H), 8.22 (dd,  $J = 9.1, 0.4$  Hz, 1 H), 7.82 (dd,  $J = 9.1, 1.7$  Hz, 1 H), 7.78 (s, 1 H), 6.49 (d,  $J = 1.6$  Hz, 1 H), 4.35-4.28 (m, 1 H), 3.93 (s, 3 H), 3.89-3.82 (m, 2 H), 3.79-3.69 (m, 2 H). HRMS (CI) calcd. for  $\text{C}_{15}\text{H}_{13}^{35}\text{ClN}_2\text{O}_4$  ( $\text{M}^+$ )  $m/z$  320.0534, found 320.0563.

**Methyl 1-(chloromethyl)-3-{5-[2-(dimethylamino)ethoxy]indol-2-carbonyl}-5-nitro-1,2-dihydro-3H-benzo[e]indole-8-carboxylate (36).** A solution of **159** (70 mg, 0.22 mmol) in  $\text{HCl(g)}$  saturated dioxane (5 mL) was stirred for 2 h. The dioxane was removed under reduced pressure to give the hydrochloride salt (78 mg, 100%). 5-[2-(Dimethylamino)ethoxy]indole-2-carboxylic acid hydrochloride (75 mg, 0.26 mmol), EDCI (126 mg, 0.66 mmol), and DMA (5 mL) were added and the mixture was stirred under a  $\text{N}_2$  atmosphere for 5 h. The mixture was partitioned between  $\text{CH}_2\text{Cl}_2$  and ice-cold 5% aq  $\text{KHCO}_3$ . The aqueous portion was extracted with cold  $\text{CH}_2\text{Cl}_2$  ( $\times 3$ ) and the combined extracts were washed with water, brine and dried. The solvent was evaporated and the residue was dissolved in  $\text{CH}_2\text{Cl}_2/\text{MeOH}$  and solvents were concentrated under reduced pressure until precipitation began. The precipitate was filtered off and washed with MeOH to give crude **36** (101 mg, 84%) as an

orange powder: HRMS (FAB) calcd. for  $C_{28}H_{27}^{35}ClN_4O_6$  ( $MH^+$ )  $m/z$  551.1697, found 551.1696.  $^1H$  NMR analysis showed that this sample contained 8% of the corresponding exomethylene compound (methyl 3-{5-[2-(dimethylamino)ethoxy]indol-2-carbonyl}-1-methylene-5-nitro-1,2-dihydro-3*H*-benzo[*e*]indole-8-carboxylate). The sample was purified by HPLC (Synergi MAX column,  $CH_3CN/H_2O/TFA$ , pH 2.5) to give **36**·TFA (38 mg, 99% purity by HPLC analysis) as an orange powder: mp >320 °C;  $^1H$  NMR [ $(CD_3)_2SO$ ]  $\delta$  11.80 (d,  $J$  = 1.8 Hz, 1 H), 9.63 (br s, 1 H), 9.26 (s, 1 H), 8.74 (d,  $J$  = 1.1 Hz, 1 H), 8.49 (d,  $J$  = 9.4 Hz, 1 H), 8.17 (dd,  $J$  = 9.1, 1.7 Hz, 1 H), 7.48 (d,  $J$  = 8.9 Hz, 1 H), 7.28 (d,  $J$  = 2.4 Hz, 1 H), 7.25 (d,  $J$  = 1.6 Hz, 1 H), 7.05 (dd,  $J$  = 8.9, 2.4 Hz, 1 H), 4.96 (dd,  $J$  = 10.6, 9.4 Hz, 1 H), 4.83-4.74 (m, 1 H), 4.70 (dd,  $J$  = 10.8, 2.3 Hz, 1 H), 4.35 (t,  $J$  = 4.8 Hz, 2 H), 4.14 (dd,  $J$  = 11.4, 3.4 Hz, 1 H), 4.05 (dd,  $J$  = 11.4, 5.8 Hz, 1 H), 3.98 (s, 3 H), 3.57 (br s, 2 H), 2.91 (br s, 6 H);  $^{13}C$  NMR  $\delta$  165.5, 160.5, 152.0, 146.3, 141.5, 133.5, 132.3, 130.1, 129.1, 128.9, 127.3, 126.5, 125.9, 124.3, 123.5, 116.6, 116.1, 113.3, 106.2, 104.0, 62.6, 55.6, 54.8, 52.6, 47.8, 42.8, 41.4.

### Synthesis of 37.

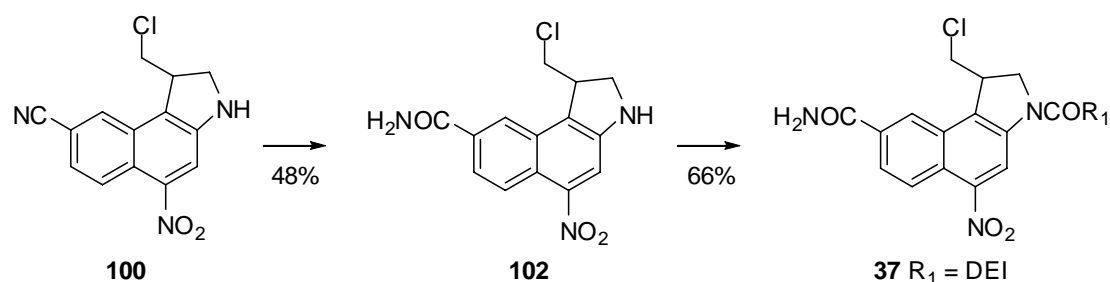

**1-(Chloromethyl)-5-nitro-1,2-dihydro-3H-benzo[e]indole-8-carboxamide (102).** A solution of **100**-HCl (81 mg, 0.25 mmol) in  $\text{CH}_2\text{SO}_4$  (9 mL) and water (1 mL) was heated at 60 °C for 1 h, then poured into cold water. Conc. aq  $\text{NH}_3$  was carefully added until the pH of the mixture was 3, followed by careful addition of solid  $\text{KHCO}_3$  until the pH of the mixture was 8. The mixture was extracted with cold  $\text{CH}_2\text{Cl}_2$  ( $\times 3$ ), and the combined organic extracts were washed with water, brine, and dried. The solvent was evaporated and the residue was dissolved in  $\text{CH}_2\text{Cl}_2/\text{MeOH}$ . The solvents were concentrated until precipitation began. The precipitate was filtered off and washed with MeOH to give crude **102** (37 mg, 48%) as red crystals: mp >300 °C;  $^1\text{H}$  NMR [ $(\text{CD}_3)_2\text{SO}$ ]  $\delta$  (two H not observed) 8.32 (d,  $J = 1.3$  Hz, 1 H), 8.17 (d,  $J = 9.1$  Hz, 1 H), 7.80 (dd,  $J = 9.1, 1.7$  Hz, 1 H), 7.72 (s, 1 H), 7.53 (br s, 1 H), 4.26-4.18 (m, 1 H), 3.99 (dd,  $J = 10.9, 3.8$  Hz, 1 H), 3.83 (t,  $J = 10.1$  Hz, 1 H), 3.77-3.69 (m, 2 H).  $^1\text{H}$  NMR also showed the presence of an unidentified impurity (ca. 10%) which was not removed by chromatography. HRMS (CI) calcd. for  $\text{C}_{14}\text{H}_{12}^{35}\text{ClN}_3\text{O}_3$  ( $\text{M}^+$ )  $m/z$  305.0567, found 305.0564.

**1-(Chloromethyl)-3-{5-[2-(dimethylamino)ethoxy]indol-2-carbonyl}-5-nitro-1,2-dihydro-3H-benzo[e]indole-8-carboxamide (37).** A solution of **102** (30 mg, 0.098 mmol) in  $\text{HCl(g)}$  saturated dioxane (5 mL) was stirred for 1 h, then evaporated to give the amine hydrochloride (34 mg, 0.098 mmol, 100%). 5-[2-(Dimethylamino)ethoxy]indole-2-carboxylic acid hydrochloride (34 mg, 0.098 mmol), EDCI (57 mg, 0.30 mmol), and DMA (4 mL) were added and the mixture was stirred under a  $\text{N}_2$  atmosphere for 15 h. The mixture was partitioned between EtOAc and cold (0 °C) 5% aq  $\text{KHCO}_3$ . The aqueous portion was extracted with cold EtOAc ( $\times 3$ ) and the combined extracts were washed with water, brine and dried. The solvent was evaporated and the residue was dissolved in  $\text{CH}_2\text{Cl}_2/\text{MeOH}$ , and solvents were concentrated until precipitation began. The precipitate was filtered off and washed with MeOH to give crude **37** (35 mg, 66%) as an orange powder: HRMS (FAB) calcd. for  $\text{C}_{27}\text{H}_{26}^{35}\text{ClN}_5\text{O}_5$  ( $\text{MH}^+$ )  $m/z$  536.1701, found 536.1710.  $^1\text{H}$  NMR analysis showed that this sample contained 13% of the corresponding exomethylene compound (3-{5-[2-(dimethylamino)ethoxy]indol-2-carbonyl}-1-methylene-5-nitro-1,2-dihydro-3H-benzo[e]indole-8-carboxamide). The sample was purified by HPLC (Synergi MAX column,  $\text{CH}_3\text{CN}/\text{H}_2\text{O}/\text{TFA}$ , pH 2.5) to give **37**-TFA (38 mg) as an orange powder: mp >320 °C;  $^1\text{H}$  NMR [ $(\text{CD}_3)_2\text{SO}$ ]  $\delta$  11.71 (d,  $J = 1.7$  Hz, 1 H), 9.60 (br s, 1 H), 9.21 (s, 1 H), 8.62 (d,  $J = 1.2$  Hz, 1 H), 8.43 (d,  $J = 9.1$  Hz, 1 H), 8.40 (s, 1 H), 8.14 (dd,  $J = 7.3, 1.7$  Hz, 1 H), 7.70 (br s, 1 H), 7.47 (d,  $J = 8.9$  Hz, 1 H), 7.27 (d,  $J = 2.4$  Hz, 1 H), 7.23 (d,  $J = 1.7$  Hz, 1 H), 7.04 (dd,  $J = 8.9, 2.4$  Hz, 1 H), 4.97 (dd,  $J = 10.8, 9.5$  Hz, 1 H), 4.72 (dd,  $J = 10.8, 2.2$  Hz, 1 H), 4.68-4.61

(m, 1 H), 4.33 (t,  $J = 5.0$  Hz, 2 H), 4.21 (dd,  $J = 11.3, 3.2$  Hz, 1 H), 4.13 (dd,  $J = 11.1, 6.1$  Hz, 1 H), 3.48 (br s, 2 H), 2.85 (s, 6 H);  $^{13}\text{C}$  NMR  $\delta$  166.9, 160.5, 152.1, 146.3, 141.1, 133.6, 133.2, 132.2, 130.2, 129.0, 127.3, 126.5, 123.6, 123.0, 122.8, 116.1, 115.8, 113.3, 106.0, 104.0, 63.0, 55.8, 54.7, 47.7, 43.0, 41.5. Anal. ( $\text{C}_{27}\text{H}_{26}\text{ClN}_5\text{O}_6 \cdot \text{TFA} \cdot 1\frac{1}{2}\text{H}_2\text{O}$ ) C, H.



## Synthesis of 18 and 38.

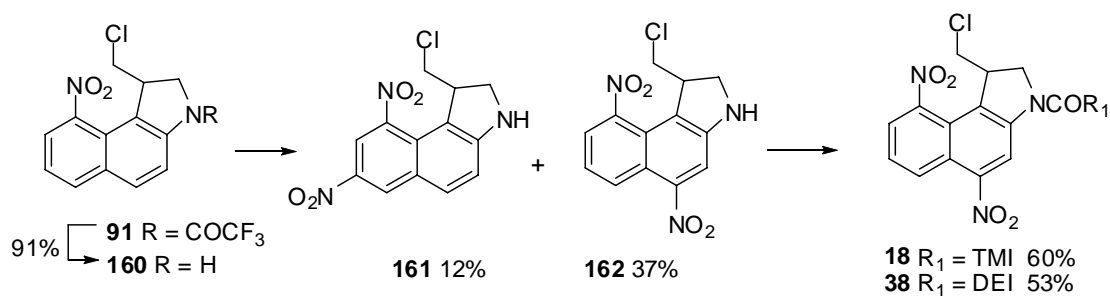

**1-(Chloromethyl)-9-nitro-1,2-dihydro-3H-benzo[e]indole (160).** A solution of **91** (1.54 g, 4.29 mmol) in dioxane (10 mL) was treated with a solution of  $\text{Cs}_2\text{CO}_3$  (3.26 g, 10 mmol) in water (3 mL) and MeOH (7 mL) and the mixture was stirred at room temperature for 10 min. The mixture was treated with AcOH (1.2 mL), then concentrated under reduced pressure to a small volume and partitioned between water and  $\text{CH}_2\text{Cl}_2$ . The organic phase was washed with water ( $\times 2$ ), dried, and filtered through a column of silica gel. The resulting oil was crystallized from EtOAc/petroleum ether to give **160** (1.03 g, 91%) as a red solid: mp 100 °C;  $^1\text{H}$  NMR [ $(\text{CD}_3)_2\text{SO}$ ]  $\delta$  8.07 (dd,  $J = 8.0, 1.1$  Hz, 1 H), 7.94 (dd,  $J = 7.6, 1.3$  Hz, 1 H), 7.87 (d,  $J = 8.7$  Hz, 1 H), 7.21 (t,  $J = 7.8$  Hz, 1 H), 7.13 (d,  $J = 8.7$  Hz, 1 H), 6.63 (s, 1 H), 3.81-3.71 (m, 1 H), 3.71-3.62 (m, 1 H), 3.62-3.54 (m, 1 H), 3.33-3.25 (m, 2 H). Anal. ( $\text{C}_{13}\text{H}_{11}\text{ClN}_2\text{O}_2$ ) C, H, N.

**1-(Chloromethyl)-5,9-dinitro-1,2-dihydro-3H-benzo[e]indole (162).** A stirred solution of **160** (900 mg, 3.43 mmol) in  $\text{cH}_2\text{SO}_4$  (9 mL) was cooled to  $-5$  °C and treated with powdered  $\text{KNO}_3$  (520 mg, 5.14 mmol). The mixture was stirred at 0 °C for a further 15 min, then poured into ice-water and the solid was collected. Chromatography on silica gel, eluting with petroleum ether/EtOAc (3:1), followed by two recrystallizations from  $\text{CH}_2\text{Cl}_2/\text{iPr}_2\text{O}$  gave **162** (394 mg, 37%) as a red solid: mp 130-131 °C;  $^1\text{H}$  NMR [ $(\text{CD}_3)_2\text{SO}$ ]  $\delta$  8.21 (dd,  $J = 8.6, 1.1$  Hz, 1 H), 8.10 (dd,  $J = 7.6, 1.1$  Hz, 1 H), 7.75 (s, 1 H), 7.44 (dd,  $J = 8.6, 7.6$  Hz, 1 H), 7.02 (s, 1 H), 3.89-3.81 (m, 1 H), 3.72-3.62 (m, 2 H), 3.41-3.35 (m, 2 H). Anal. ( $\text{C}_{13}\text{H}_{10}\text{ClN}_3\text{O}_4$ ) C, H, N, Cl.

Further elution with petroleum ether/EtOAc (2:1) gave 1-(chloromethyl)-7,9-dinitro-1,2-dihydro-3H-benzo[e]indole (**161**) (122 mg, 12%) as a red solid: mp (EtOAc/ $\text{iPr}_2\text{O}$ ) 216-218 °C;  $^1\text{H}$  NMR [ $(\text{CD}_3)_2\text{SO}$ ]  $\delta$  9.00 (d,  $J = 2.4$  Hz, 1 H), 8.65 (d,  $J = 2.5$  Hz, 1 H), 8.19 (d,  $J = 8.9$  Hz, 1 H), 7.74 (s, 1 H), 7.24 (d,  $J = 8.9$  Hz, 1 H), 3.93 (dd,  $J = 10.8, 9.0$  Hz, 1 H), 3.76-3.68 (m, 1 H), 3.67 (dd,  $J = 11.0, 2.4$  Hz, 1 H), 3.38-3.24 (after  $\text{D}_2\text{O}$  exchange, m, 2 H). Anal. ( $\text{C}_{13}\text{H}_{10}\text{ClN}_3\text{O}_4$ ) C, H, N, Cl.

**1-(Chloromethyl)-5,9-dinitro-(5,6,7-trimethoxyindol-2-carbonyl)-1,2-dihydro-3H-benzo[e]indole (18).** A suspension of 5,6,7-trimethoxyindole-2-carboxylic acid (122 mg, 0.49 mmol) in dry  $\text{CH}_2\text{Cl}_2$  (10 mL) was treated with oxalyl chloride (0.13 mL, 1.49 mmol) followed by DMF (10  $\mu\text{L}$ ). The mixture was stirred at room temperature for 15 min, then evaporated under reduced pressure and azeotroped dry with benzene. The resulting acid chloride was cooled to  $-5$  °C and treated with an ice-cold solution of **162** (100 mg, 0.33 mmol) in dry pyridine (2 mL) containing DMAP (5 mg). The stirred mixture was warmed to room temperature for 30 min, then poured into dilute aqueous  $\text{KHCO}_3$ .

The precipitate was collected, purified by chromatography on silica gel eluting with CH<sub>2</sub>Cl<sub>2</sub>/EtOAc (19:1), then crystallized from CH<sub>2</sub>Cl<sub>2</sub>/EtOAc to give **18** (106 mg, 60%) as a yellow solid: mp 270-271 °C; <sup>1</sup>H NMR [(CD<sub>3</sub>)<sub>2</sub>SO] δ 11.67 (d, *J* = 1.0 Hz, 1 H), 9.22 (s, 1 H), 8.53 (dd, *J* = 8.8, 0.9 Hz, 1 H), 8.34 (dd, *J* = 7.4, 0.9 Hz, 1 H), 7.84 (dd, *J* = 8.7, 7.6 Hz, 1 H), 7.17 (d, *J* = 2.1 Hz, 1 H), 6.99 (s, 1 H), 4.93 (dd, *J* = 10.9, 9.0 Hz, 1 H), 4.53 (dd, *J* = 11.0, 1.8 Hz, 1 H), 3.99-3.89 (m, 4 H), 3.83 (s, 3 H), 3.81 (s, 3 H), 3.70 (dd, *J* = 11.5, 3.3 Hz, 1 H), 3.55 (dd, *J* = 11.5, 7.0 Hz, 1 H). HRMS (FAB) calcd. for C<sub>25</sub>H<sub>21</sub><sup>35</sup>ClN<sub>4</sub>O<sub>8</sub> (M<sup>+</sup>) *m/z* 540.1048, found 540.1034. Anal. (C<sub>25</sub>H<sub>21</sub>ClN<sub>4</sub>O<sub>8</sub>) C, H, N.

**1-(Chloromethyl)-3-{5-[2-(dimethylamino)ethoxy]indol-2-carbonyl}-5,9-dinitro-1,2-dihydro-3*H*-benzo[*e*]indole (38).** A mixture of **162** (100 mg, 0.33 mmol), 5-[2-(dimethylamino)ethoxy]indole-2-carboxylic acid hydrochloride (111 mg, 0.39 mmol), EDCI (249 mg, 1.30 mmol) and anhydrous TsOH (40 mg, 0.23 mmol) in dry DMA (6 mL) was stirred at room temperature under N<sub>2</sub> for 6 h, then poured into dilute aq NH<sub>3</sub>. The solid was collected, dissolved in CH<sub>2</sub>Cl<sub>2</sub> at room temperature, dried, and concentrated under reduced pressure below 30 °C to a small volume and diluted with EtOAc/iPr<sub>2</sub>O to give **38**. Treatment of a solution of the free base in CH<sub>2</sub>Cl<sub>2</sub> with HCl(g)/EtOAc/hexane, followed by crystallization from MeOH/Me<sub>2</sub>CO/EtOAc, gave **38**·HCl (99 mg, 53%) as a yellow solid: mp 187-191 °C; <sup>1</sup>H NMR [(CD<sub>3</sub>)<sub>2</sub>SO] δ 11.87 (d, *J* = 1.6 Hz, 1 H), 10.01 (br s, 1 H), 9.28 (s, 1 H), 8.53 (dd, *J* = 8.8, 1.0 Hz, 1 H), 8.36 (dd, *J* = 7.5, 1.0 Hz, 1 H), 7.85 (dd, *J* = 8.7, 7.6 Hz, 1 H), 7.46 (d, *J* = 8.9 Hz, 1 H), 7.28 (d, *J* = 2.3 Hz, 1 H), 7.21 (d, *J* = 1.6 Hz, 1 H), 7.04 (dd, *J* = 8.9, 2.4 Hz, 1 H), 4.99 (dd, *J* = 10.8, 9.0 Hz, 1 H), 4.60 (dd, *J* = 10.9, 1.7 Hz, 1 H), 4.35 (t, *J* = 5.0 Hz, 2 H), 4.02-3.92 (m, 1 H), 3.70 (dd, *J* = 11.4, 3.3 Hz, 1 H), 3.58 (dd, *J* = 11.4, 7.2 Hz, 1 H), 3.52 (t, *J* = 4.8 Hz, 2 H), 2.87 (s, 6 H). Anal. (C<sub>26</sub>H<sub>24</sub>ClN<sub>5</sub>O<sub>6</sub>·HCl) C, H, N.

## Synthesis of anilines 41-44 and 47-52.

**5-Amino-1-(chloromethyl)-3-(5,6,7-trimethoxyindol-2-carbonyl)-1,2-dihydro-3H-benzo[*e*]indole-7-carbonitrile (41).** Compound **11** was hydrogenated as described in the general method (50 psi for 30 min) and the crude product purified by chromatography on silica gel, eluting with EtOAc/petroleum ether (1:1), to give **41** (60%) as a yellow solid: mp 280-285 °C (dec.); <sup>1</sup>H NMR [(CD<sub>3</sub>)<sub>2</sub>SO] δ 11.42 (d, *J* = 1.6 Hz, 1 H), 8.67 (d, *J* = 1.3 Hz, 1 H), 7.88 (d, *J* = 8.7 Hz, 1 H), 7.72 (s, 1 H), 7.63 (dd, *J* = 8.7, 1.5 Hz, 1 H), 7.06 (d, *J* = 2.2 Hz, 1 H), 6.96 (s, 1 H), 6.41 (s, 2 H), 4.69 (dd, *J* = 10.9, 9.0 Hz, 1 H), 4.42 (dd, *J* = 11.0, 1.8 Hz, 1 H), 4.15-4.08 (m, 1 H), 3.97-3.92 (m, 1 H), 3.93 (s, 3 H), 3.82 (s, 3 H), 3.80 (s, 3 H), 3.76 (dd, *J* = 11.0, 7.7 Hz, 1 H). <sup>1</sup>H NMR and HPLC analysis showed the presence of an impurity (7%), presumably formed by over-reduction of the 7-CN substituent. HRMS (FAB) calcd. for C<sub>26</sub>H<sub>23</sub><sup>35</sup>ClN<sub>4</sub>O<sub>4</sub> (MH<sup>+</sup>) *m/z* 490.1408, found 490.1400.

**5-Amino-1-(chloromethyl)-3-(5,6,7-trimethoxyindol-2-carbonyl)-1,2-dihydro-3H-benzo[*e*]indole-7-sulfonamide (42).** Compound **10** was hydrogenated as described in the general method (50 psi for 60 min) to give **42** (65%) as a yellow powder: mp 240-245 °C (dec.); <sup>1</sup>H NMR [(CD<sub>3</sub>)<sub>2</sub>SO] δ 11.40 (s, 1 H), 8.55 (d, *J* = 1.6 Hz, 1 H), 7.92 (d, *J* = 8.9 Hz, 1 H), 7.80 (dd, *J* = 8.9, 1.7 Hz, 1 H), 7.73 (s, 1 H), 7.24 (s, 2 H), 7.06 (s, 1 H), 6.97 (s, 1 H), 6.21 (s, 2 H), 4.70 (dd, *J* = 10.9, 9.0 Hz, 1 H), 4.43 (dd, *J* = 11.0, 1.8 Hz, 1 H), 4.16-4.09 (m, 1 H), 3.98 (dd, *J* = 11.0, 3.1 Hz, 1 H), 3.94 (s, 3 H), 3.82 (s, 3 H), 3.80 (s, 3 H), 3.76 (dd, *J* = 11.0, 7.9 Hz, 1 H). Anal. (C<sub>25</sub>H<sub>25</sub>ClN<sub>4</sub>O<sub>6</sub>S) C, H, N.

**5-Amino-1-(chloromethyl)-3-(5,6,7-trimethoxyindol-2-carbonyl)-1,2-dihydro-3H-benzo[*e*]indole-7-carboxamide (43).** Compound **15** was hydrogenated as described (50 psi for 45 min) to give **43** (71%) as a pale yellow-green solid: mp 260-265 °C (dec.); <sup>1</sup>H NMR [(CD<sub>3</sub>)<sub>2</sub>SO] δ 11.39 (d, *J* = 1.4 Hz, 1 H), 8.65 (d, *J* = 0.9 Hz, 1 H), 7.91 (dd, *J* = 8.7, 1.4 Hz, 1 H), 7.84 (s, 1 H), 7.78 (d, *J* = 8.8 Hz, 1 H), 7.66 (s, 1 H), 7.33 (s, 1 H), 7.04 (d, *J* = 2.0 Hz, 1 H), 6.96 (s, 1 H), 6.10 (s, 2 H), 4.68 (dd, *J* = 10.9, 9.0 Hz, 1 H), 4.41 (dd, *J* = 11.0, 1.7 Hz, 1 H), 4.14-4.08 (m, 1 H), 3.97 (dd, *J* = 11.1, 3.2 Hz, 1 H), 3.94 (s, 3 H), 3.83 (s, 3 H), 3.80 (s, 3 H), 3.75 (dd, *J* = 11.0, 8.0 Hz, 1 H). Anal. (C<sub>26</sub>H<sub>25</sub>ClN<sub>4</sub>O<sub>5</sub>) C, H, N.

**5-Amino-1-(chloromethyl)-8-(methylsulfonyl)-3-(5,6,7-trimethoxyindol-2-carbonyl)-1,2-dihydro-3H-benzo[*e*]indole (44).** Compound **16** was hydrogenated as described in the general method (45 psi for 90 min) to give **44** (84%) as a yellow solid: mp (*i*Pr<sub>2</sub>O/THF) 165-170 °C; <sup>1</sup>H NMR [(CD<sub>3</sub>)<sub>2</sub>SO] δ 11.41 (d, *J* = 2.0 Hz, 1 H), 8.33 (d, *J* = 8.9 Hz, 1 H), 8.26 (d, *J* = 1.8 Hz, 1 H), 7.81 (s, 1 H), 7.66 (dd, *J* = 8.9, 1.8 Hz, 1 H), 7.08 (d, *J* = 2.2 Hz, 1 H), 6.96 (s, 1 H), 6.26 (s, 2 H), 4.71 (dd, *J* = 10.9, 8.8 Hz, 1 H), 4.45 (dd, *J* = 11.0, 1.6 Hz, 1 H), 4.24-4.17 (m, 1 H), 4.00 (dd, *J* = 11.0, 3.3 Hz, 1 H), 3.95 (s, 3 H), 3.83 (s, 3 H), 3.81 (s, 3 H), 3.74 (dd, *J* = 11.0, 7.9 Hz, 1 H), 3.32 (s, 3 H). Anal. (C<sub>26</sub>H<sub>26</sub>ClN<sub>3</sub>O<sub>6</sub>S·½H<sub>2</sub>O) C, H, N.

**5-Amino-1-(chloromethyl)-3-{5-[2-(dimethylamino)ethoxy]indol-2-carbonyl}-7-(methylsulfonyl)-1,2-dihydro-3H-benzo[*e*]indole (46).** Compound **26** (as the free base) was hydrogenated as described in the general method (45 psi for 60 min) to give **46** (81%) as a yellow solid: mp (*i*Pr<sub>2</sub>O/THF) 280-285 °C; <sup>1</sup>H NMR [(CD<sub>3</sub>)<sub>2</sub>SO] δ 11.57 (s, 1 H), 8.70 (d, *J* = 1.6 Hz, 1 H), 7.97 (d, *J* = 8.9 Hz, 1 H), 7.85-7.79 (m, 2 H), 7.40 (d, *J* = 8.9 Hz, 1 H), 7.17 (d, *J* = 2.3 Hz, 1 H), 7.10 (d, *J* = 1.7 Hz, 1 H), 6.93 (dd, *J* = 8.9, 2.4 Hz, 1 H), 6.40 (s, 2 H), 4.77 (dd, *J* = 10.8, 9.0 Hz, 1 H), 4.54

(dd,  $J = 10.9, 1.8$  Hz, 1 H), 4.24-4.16 (m, 1 H), 4.06 (t,  $J = 5.9$  Hz, 2 H), 3.99 (dd,  $J = 11.0, 3.0$  Hz, 1 H), 3.81 (dd,  $J = 11.0, 7.5$  Hz, 1 H), 3.26 (s, 3 H), 2.65 (t,  $J = 5.9$  Hz, 2 H), 2.24 (s, 6 H). Anal. ( $C_{27}H_{29}ClN_4O_4S$ ) C, H, N, Cl.

**5-Amino-1-(chloromethyl)-3-{5-[2-(dimethylamino)ethoxy]indol-2-carbonyl}-1,2-dihydro-3H-benzo[*e*]indole-7-carbonitrile (47).** Compound **27** (as the free base) was hydrogenated as described in the general method (50 psi for 60 min) to give **47** (48%) as a yellow solid: mp 250-255 °C (dec.);  $^1H$  NMR [ $(CD_3)_2SO$ ]  $\delta$  11.57 (d,  $J = 1.5$  Hz, 1 H), 8.67 (s, 1 H), 7.89 (d,  $J = 8.7$  Hz, 1 H), 7.80 (s, 1 H), 7.64 (dd,  $J = 8.7, 1.5$  Hz, 1 H), 7.39 (d,  $J = 8.9$  Hz, 1 H), 7.17 (d,  $J = 2.3$  Hz, 1 H), 7.09 (s, 1 H), 6.91 (dd,  $J = 8.9, 2.4$  Hz, 1 H), 6.40 (s, 2 H), 4.75 (dd,  $J = 10.7, 9.1$  Hz, 1 H), 4.52 (dd,  $J = 10.9, 1.8$  Hz, 1 H), 4.20-4.14 (m, 1 H), 4.06 (t,  $J = 5.9$  Hz, 2 H), 3.96 (dd,  $J = 11.0, 3.1$  Hz, 1 H), 3.77 (dd,  $J = 11.0, 7.6$  Hz, 1 H), 2.65 (t,  $J = 5.9$  Hz, 2 H), 2.24 (s, 6 H). HRMS (FAB) calcd. for  $C_{27}H_{27}^{35}ClN_5O_2$  ( $MH^+$ )  $m/z$  488.1853, found 488.1847.

**5-Amino-1-(chloromethyl)-3-{5-[2-(dimethylamino)ethoxy]indol-2-carbonyl}-1,2-dihydro-3H-benzo[*e*]indole-7-sulfonamide (48).** Compound **28** (as the free base) was hydrogenated as described in the general method (50 psi for 60 min) to give **48** (43%) as a yellow solid: mp 260-266 °C (dec.);  $^1H$  NMR [ $(CD_3)_2SO$ ]  $\delta$  11.56 (s, 1 H), 8.56 (d,  $J = 1.5$  Hz, 1 H), 7.93 (d,  $J = 8.9$  Hz, 1 H), 7.81 (s, 1 H), 7.80 (dd,  $J = 8.8, 1.7$  Hz, 1 H), 7.40 (d,  $J = 8.9$  Hz, 1 H), 7.24 (s, 2 H), 7.17 (d,  $J = 2.3$  Hz, 1 H), 7.08 (s, 1 H), 6.91 (dd,  $J = 8.9, 2.4$  Hz, 1 H), 6.22 (s, 2 H), 4.77 (dd,  $J = 10.8, 9.1$  Hz, 1 H), 4.53 (dd,  $J = 10.9, 1.8$  Hz, 1 H), 4.22-4.14 (m, 1 H), 4.06 (t,  $J = 5.9$  Hz, 2 H), 3.99 (dd,  $J = 11.0, 3.0$  Hz, 1 H), 3.80 (dd,  $J = 10.9, 7.7$  Hz, 1 H), 2.65 (t,  $J = 5.8$  Hz, 2 H), 2.24 (s, 6 H). HRMS (FAB) calcd. for  $C_{26}H_{29}^{35}ClN_5O_4S$  ( $MH^+$ )  $m/z$  542.1629, found 542.1625.

**7-Acetyl-5-amino-1-(chloromethyl)-3-{5-[2-(dimethylamino)ethoxy]indol-2-carbonyl}-1,2-dihydro-3H-benzo[*e*]indole (49).** Compound **29** (as the free base) was hydrogenated as described in the general method (50 psi for 20 min). The crude product purified by chromatography on silica gel, eluting with EtOAc/MeOH (4:1), followed by trituration with EtOAc to give **49** (31%) as a yellow solid: mp 220-224 °C (dec.);  $^1H$  NMR [ $(CD_3)_2SO$ ]  $\delta$  11.56 (s, 1 H), 8.78 (d,  $J = 1.2$  Hz, 1 H), 7.88 (dd,  $J = 8.8, 1.5$  Hz, 1 H), 7.78 (d,  $J = 8.8$  Hz, 1 H), 7.75 (s, 1 H), 7.38 (d,  $J = 8.9$  Hz, 1 H), 7.16 (d,  $J = 2.3$  Hz, 1 H), 7.08 (d,  $J = 1.5$  Hz, 1 H), 6.92 (dd,  $J = 8.9, 2.4$  Hz, 1 H), 6.43 (s, 2 H), 4.75 (dd,  $J = 10.8, 9.0$  Hz, 1 H), 4.51 (dd,  $J = 10.9, 1.9$  Hz, 1 H), 4.19-4.13 (m, 1 H), 4.07 (t,  $J = 5.9$  Hz, 2 H), 3.97 (dd,  $J = 10.9, 3.1$  Hz, 1 H), 3.81-3.75 (m, 1 H), 2.68 (s, 3 H), 2.65 (t,  $J = 5.9$  Hz, 2 H), 2.24 (s, 6 H). HRMS (FAB) calcd. for  $C_{28}H_{30}^{35}ClN_4O_3$  ( $MH^+$ )  $m/z$  505.2006, found 505.1999.

**Methyl 5-amino-1-(chloromethyl)-3-{5-[2-(dimethylamino)ethoxy]indol-2-carbonyl}-1,2-dihydro-3H-benzo[*e*]indole-7-carboxylate (50).** Compound **30** (as the free base) was hydrogenated as described in the general method (50 psi for 45 min) to give **50** (82%) as a yellow solid: mp 225-230 °C;  $^1H$  NMR [ $(CD_3)_2SO$ ]  $\delta$  11.57 (d,  $J = 1.6$  Hz, 1 H), 8.80 (d,  $J = 1.4$  Hz, 1 H), 7.90 (dd,  $J = 8.8, 1.6$  Hz, 1 H), 7.82 (d,  $J = 8.8$  Hz, 1 H), 7.76 (s, 1 H), 7.40 (d,  $J = 8.9$  Hz, 1 H), 7.17 (d,  $J = 2.4$  Hz, 1 H), 7.08 (d,  $J = 1.5$  Hz, 1 H), 6.91 (dd,  $J = 8.9, 2.4$  Hz, 1 H), 6.34 (s, 2 H), 4.75 (dd,  $J = 10.8, 8.9$  Hz, 1 H), 4.52 (dd,  $J = 10.9, 1.8$  Hz, 1 H), 4.18-4.11 (m, 1 H), 4.06 (t,  $J = 5.9$  Hz, 2 H), 3.98 (dd,  $J = 11.0, 3.1$  Hz, 1 H), 3.90 (s, 3 H), 3.78 (dd,  $J = 11.0, 7.9$  Hz, 1 H), 2.65 (t,  $J = 5.9$  Hz, 2 H), 2.23 (s, 6 H). Anal. ( $C_{28}H_{29}ClN_4O_4$ ) C, H, N.

**5-Amino-1-(chloromethyl)-3-{5-[2-(dimethylamino)ethoxy]indol-2-carbonyl}-1,2-dihydro-3H-benzo[e]indole-7-carboxamide (51).** Compound **31** (as the free base) was hydrogenated as described in the general method (50 psi for 45 min) to give **51** (70%) as a green solid: mp 232-236 °C (dec.); <sup>1</sup>H NMR [(CD<sub>3</sub>)<sub>2</sub>SO] δ 11.55 (d, *J* = 1.6 Hz, 1 H), 8.66 (s, 1 H), 7.90 (dd, *J* = 8.7, 1.5 Hz, 1 H), 7.83 (br s, 1 H), 7.78 (d, *J* = 8.8 Hz, 1 H), 7.73 (s, 1 H), 7.39 (d, *J* = 8.9 Hz, 1 H), 7.32 (br s, 1 H), 7.17 (d, *J* = 2.3 Hz, 1 H), 7.07 (d, *J* = 1.4 Hz, 1 H), 6.91 (dd, *J* = 8.9, 2.4 Hz, 1 H), 6.11 (s, 2 H), 4.75 (dd, *J* = 10.8, 9.0 Hz, 1 H), 4.51 (dd, *J* = 10.9, 1.8 Hz, 1 H), 4.18-4.12 (m, 1 H), 4.06 (t, *J* = 5.9 Hz, 2 H), 3.98 (dd, *J* = 10.9, 3.1 Hz, 1 H), 3.78 (dd, *J* = 11.0, 7.9 Hz, 1 H), 2.65 (t, *J* = 5.9 Hz, 2 H), 2.24 (s, 6 H). Anal. (C<sub>27</sub>H<sub>28</sub>ClN<sub>5</sub>O<sub>3</sub>·½H<sub>2</sub>O) C, H, N.

**5-Amino-1-(chloromethyl)-3-{5-[2-(dimethylamino)ethoxy]indol-2-carbonyl}-8-(methylsulfonyl)-1,2-dihydro-3H-benzo[e]indole (52).** Compound **32** (as the free base) was hydrogenated as described in the general method (50 psi for 60 min) to give **52** as a pale yellow solid: mp (*i*-Pr<sub>2</sub>O/THF) 235-240 °C; <sup>1</sup>H NMR [(CD<sub>3</sub>)<sub>2</sub>SO] δ 11.56 (d, *J* = 1.6 Hz, 1 H), 8.33 (d, *J* = 8.9 Hz, 1 H), 8.26 (d, *J* = 1.8 Hz, 1 H), 7.88 (s, 1 H), 7.67 (dd, *J* = 8.9, 1.8 Hz, 1 H), 7.40 (d, *J* = 8.9 Hz, 1 H), 7.17 (d, *J* = 2.3 Hz, 1 H), 7.10 (d, *J* = 1.4 Hz, 1 H), 6.92 (dd, *J* = 8.9, 2.4 Hz, 1 H), 6.26 (s, 2 H), 4.76 (dd, *J* = 10.8, 8.9 Hz, 1 H), 4.55 (dd, *J* = 10.9, 1.6 Hz, 1 H), 4.28-4.21 (m, 1 H), 4.06 (t, *J* = 5.9 Hz, 2 H), 4.01 (dd, *J* = 11.0, 3.3 Hz, 1 H), 3.78 (dd, *J* = 11.1, 7.8 Hz, 1 H), 3.32 (s, 3 H), 2.65 (t, *J* = 5.9 Hz, 2 H), 2.23 (s, 6 H). Anal. (C<sub>27</sub>H<sub>29</sub>ClN<sub>4</sub>O<sub>4</sub>S·½H<sub>2</sub>O) C, H, N.

**Combustion analyses for the new compounds of Tables 1 - 3**

| No | Found |      |       |           | Calculated |      |       |           |
|----|-------|------|-------|-----------|------------|------|-------|-----------|
|    | C     | H    | N     | Other     | C          | H    | N     | Other     |
| 7  | 55.60 | 4.02 | 10.44 |           | 55.51      | 3.91 | 10.36 |           |
| 8  | 59.48 | 4.35 | 7.50  |           | 59.29      | 4.57 | 7.68  |           |
| 9  | 55.76 | 4.17 | 10.29 |           | 55.51      | 3.91 | 10.36 |           |
| 10 | 53.57 | 4.46 | 7.30  |           | 53.56      | 4.32 | 7.21  |           |
| 11 | 59.94 | 3.83 | 10.71 |           | 59.94      | 4.06 | 10.76 |           |
| 12 | 52.00 | 4.28 | 9.35  |           | 52.22      | 4.03 | 9.74  |           |
| 13 | 60.35 | 4.47 | 7.52  |           | 60.28      | 4.50 | 7.81  |           |
| 14 | 58.30 | 4.23 | 7.38  |           | 58.54      | 4.37 | 7.59  |           |
| 15 | 58.07 | 4.36 | 9.89  |           | 57.94      | 4.30 | 10.40 |           |
| 16 | 54.41 | 4.31 | 7.39  |           | 54.40      | 4.21 | 7.32  |           |
| 17 | 52.54 | 4.42 | 9.16  |           | 52.39      | 4.40 | 9.05  |           |
| 18 | 55.52 | 3.90 | 10.22 |           | 55.51      | 3.91 | 10.36 |           |
| 20 | 51.87 | 4.74 | 11.69 |           | 51.92      | 4.69 | 11.65 |           |
| 21 | 62.09 | 4.71 | 13.12 |           | 62.09      | 4.69 | 13.41 |           |
| 22 | 54.39 | 4.60 | 12.12 | 6.37 (Cl) | 54.59      | 4.58 | 12.24 | 6.20 (Cl) |
| 23 | 61.80 | 5.10 | 10.49 | 6.65 (Cl) | 61.86      | 5.09 | 10.47 | 6.65 (Cl) |
| 24 | 60.30 | 4.86 | 12.91 | 6.67 (Cl) | 60.50      | 4.89 | 13.07 | 6.61 (Cl) |
| 25 | 54.26 | 4.54 | 11.92 |           | 54.37      | 4.39 | 12.19 |           |
| 26 | 53.35 | 4.66 | 8.97  |           | 53.38      | 4.65 | 9.22  |           |
| 27 | 57.57 | 4.39 | 12.24 |           | 57.56      | 4.65 | 12.43 |           |
| 28 | 50.63 | 4.83 | 11.25 |           | 50.57      | 4.57 | 11.34 |           |
| 29 | 60.88 | 5.17 | 10.16 | 5.75 (Cl) | 60.82      | 5.24 | 10.13 | 6.40 (Cl) |
| 30 | 56.23 | 4.75 | 9.31  |           | 56.38      | 4.90 | 9.40  |           |
| 31 | 54.87 | 4.79 | 11.86 |           | 54.92      | 4.95 | 11.86 |           |
| 32 | 53.05 | 4.51 | 9.27  |           | 53.38      | 4.65 | 9.22  |           |
| 33 | 62.35 | 4.67 | 13.21 |           | 62.61      | 4.67 | 13.52 |           |
| 34 | 53.61 | 4.67 | 11.75 |           | 53.75      | 4.68 | 12.05 |           |
| 35 | 60.87 | 4.90 | 9.72  |           | 60.81      | 5.29 | 10.13 |           |
| 37 | 51.65 | 3.90 | 10.03 |           | 51.79      | 4.42 | 10.41 |           |
| 38 | 52.95 | 4.57 | 11.91 |           | 52.71      | 4.59 | 11.82 |           |
| 40 | 57.59 | 4.81 | 7.59  |           | 57.40      | 4.82 | 7.73  |           |
| 42 | 54.93 | 4.84 | 9.88  |           | 55.10      | 4.62 | 10.28 |           |
| 43 | 61.26 | 5.04 | 10.80 |           | 61.36      | 4.95 | 11.01 |           |
| 44 | 56.78 | 4.88 | 7.48  |           | 56.46      | 4.92 | 7.60  |           |
| 46 | 59.91 | 5.60 | 10.22 | 6.33 (Cl) | 59.93      | 5.40 | 10.36 | 6.55 (Cl) |
| 50 | 64.31 | 5.70 | 10.46 |           | 64.55      | 5.61 | 10.75 |           |

|           |       |      |       |  |       |      |       |  |
|-----------|-------|------|-------|--|-------|------|-------|--|
| <b>51</b> | 63.08 | 5.70 | 13.46 |  | 62.97 | 5.68 | 13.60 |  |
| <b>52</b> | 58.93 | 5.61 | 10.00 |  | 58.96 | 5.50 | 10.19 |  |

**Combustion analyses for new intermediate compounds.**

| No                                    | Found |      |       |            | Calculated |      |       |            |
|---------------------------------------|-------|------|-------|------------|------------|------|-------|------------|
|                                       | C     | H    | N     | Other      | C          | H    | N     | other      |
| <b>59</b><br>EWG=6-COMe               | 50.96 | 2.75 | 6.71  |            | 50.95      | 3.02 | 6.99  |            |
| <b>59</b><br>EWG=6-SO <sub>2</sub> Cl | 39.22 | 1.76 | 6.13  |            | 39.41      | 1.98 | 6.13  |            |
| <b>59</b><br>EWG=6-CN                 | 50.01 | 2.15 | 10.68 |            | 50.08      | 2.36 | 10.95 |            |
| <b>59</b><br>EWG=6-CONH <sub>2</sub>  | 48.23 | 3.28 | 9.98  | 8.48 (Cl)  | 47.84      | 2.76 | 10.46 | 8.83 (Cl)  |
| <b>64</b>                             | 62.32 | 5.49 | 4.92  |            | 62.26      | 5.23 | 4.84  |            |
| <b>65</b>                             | 62.74 | 5.35 | 5.15  |            | 62.26      | 5.23 | 4.84  |            |
| <b>66</b>                             | 66.25 | 4.39 |       |            | 66.03      | 4.62 |       |            |
| <b>67</b>                             | 57.67 | 3.79 |       |            | 57.59      | 4.03 |       |            |
| <b>69</b>                             | 52.28 | 3.53 |       | 12.45 (S)  | 52.19      | 3.58 |       | 12.66 (S)  |
| <b>70</b>                             | 66.34 | 4.40 |       |            | 66.03      | 4.62 |       |            |
| <b>71</b>                             | 57.36 | 3.99 |       |            | 57.59      | 4.03 |       |            |
| <b>72</b>                             | 56.80 | 2.39 | 5.91  | 34.32 (Br) | 56.93      | 2.61 | 6.04  | 34.43 (Br) |
| <b>75</b>                             | 39.45 | 1.94 |       |            | 39.11      | 1.98 |       |            |
| <b>76</b>                             | 62.82 | 4.26 | 2.90  |            | 62.76      | 4.46 | 3.17  |            |
| <b>77</b>                             | 69.94 | 5.24 | 3.22  |            | 70.09      | 5.20 | 3.14  |            |
| <b>78</b>                             | 69.47 | 4.66 | 3.47  |            | 69.59      | 4.91 | 3.25  |            |
| <b>81</b>                             | 73.96 | 5.27 |       |            | 73.67      | 5.30 |       |            |
| <b>82</b>                             | 72.60 | 4.60 |       |            | 72.89      | 4.71 |       |            |
| <b>84</b>                             | 67.50 | 3.99 |       |            | 67.82      | 4.38 |       |            |
| <b>86</b>                             | 56.10 | 5.11 | 4.38  | 24.66 (Br) | 55.92      | 5.01 | 4.35  | 24.80 (Br) |
| <b>88</b>                             | 68.02 | 6.15 | 4.48  |            | 68.02      | 6.34 | 4.41  |            |
| <b>89</b>                             | 57.40 | 3.65 | 4.44  |            | 57.43      | 3.53 | 4.46  |            |
| <b>90</b>                             | 50.12 | 3.00 | 7.54  |            | 50.22      | 2.81 | 7.81  |            |
| <b>91</b>                             | 50.44 | 2.94 | 7.76  |            | 50.22      | 2.81 | 7.81  |            |
| <b>92</b>                             | 57.48 | 3.44 | 3.83  |            | 57.40      | 3.68 | 3.94  |            |
| <b>93</b>                             | 57.13 | 3.54 | 3.79  |            | 57.40      | 3.68 | 3.94  |            |
| <b>94</b>                             | 43.81 | 2.16 | 3.28  | 17.10 (Cl) | 43.71      | 2.45 | 3.40  | 17.20 (Cl) |
| <b>95</b>                             | 43.85 | 2.15 | 3.27  | 17.27 (Cl) | 43.71      | 2.45 | 3.40  | 17.20 (Cl) |
| <b>96</b>                             | 41.20 | 1.99 | 2.97  |            | 40.98      | 2.29 | 3.19  |            |

|     |       |      |       |            |       |      |       |            |
|-----|-------|------|-------|------------|-------|------|-------|------------|
| 97  | 55.73 | 2.76 | 8.07  |            | 55.75 | 3.02 | 8.13  |            |
| 98  | 54.03 | 3.27 | 7.87  | 9.95 (Cl)  | 53.87 | 3.39 | 7.85  | 9.94 (Cl)  |
| 99  | 58.74 | 3.44 | 14.53 | 12.13 (Cl) | 58.44 | 3.50 | 14.61 | 12.32 (Cl) |
| 100 | 57.99 | 3.39 | 14.42 |            | 58.45 | 3.50 | 14.61 |            |
| 101 | 55.30 | 4.18 | 13.49 |            | 55.00 | 3.96 | 13.75 |            |
| 104 | 59.59 | 4.17 | 10.47 |            | 59.44 | 4.22 | 10.66 |            |
| 105 | 50.98 | 3.27 | 13.67 |            | 50.74 | 3.28 | 13.66 |            |
| 107 | 59.72 | 4.25 | 10.76 |            | 59.44 | 4.22 | 10.67 |            |
| 108 | 51.03 | 2.99 | 13.45 | 11.55 (Cl) | 50.74 | 3.28 | 13.66 | 11.52 (Cl) |
| 109 | 60.00 | 5.75 | 4.32  |            | 59.79 | 5.96 | 4.36  |            |
| 110 | 48.05 | 4.32 | 3.67  |            | 48.01 | 4.53 | 3.50  |            |
| 112 | 57.94 | 5.54 | 3.81  |            | 57.64 | 5.60 | 3.54  |            |
| 113 | 49.63 | 3.56 | 8.14  | 10.45 (Cl) | 49.34 | 3.84 | 8.22  | 10.40 (Cl) |
| 115 | 71.47 | 5.93 | 10.16 |            | 71.62 | 6.01 | 10.44 |            |
| 116 | 55.61 | 4.28 | 8.08  | 23.24 (Br) | 55.35 | 4.36 | 8.07  | 23.01 (Br) |
| 118 | 66.00 | 5.43 | 7.96  |            | 65.70 | 5.66 | 8.07  |            |
| 119 | 39.63 | 1.74 | 6.16  | 15.96 (Cl) | 39.41 | 1.98 | 6.13  | 15.51 (Cl) |
| 120 | 45.95 | 3.80 | 12.15 |            | 45.69 | 3.54 | 12.30 |            |
| 121 | 51.25 | 2.86 | 7.00  |            | 50.95 | 3.02 | 6.99  |            |
| 123 | 68.04 | 6.38 | 4.64  |            | 67.76 | 6.36 | 4.65  |            |
| 124 | 53.93 | 4.70 | 3.59  | 20.97 (Br) | 53.70 | 4.77 | 3.68  | 21.01 (Br) |
| 126 | 64.21 | 6.07 | 3.62  |            | 63.91 | 5.90 | 3.73  |            |
| 128 | 56.37 | 3.83 | 8.67  | 10.98 (Cl) | 56.18 | 4.09 | 8.73  | 11.05 (Cl) |
| 129 | 59.49 | 6.08 | 4.27  |            | 59.79 | 5.96 | 4.36  |            |
| 130 | 48.06 | 4.59 | 3.33  |            | 48.01 | 4.53 | 3.50  |            |
| 132 | 59.23 | 6.01 | 3.34  |            | 59.11 | 6.54 | 3.13  |            |
| 133 | 49.60 | 3.70 | 8.06  |            | 49.34 | 3.84 | 8.22  |            |
| 134 | 71.38 | 6.05 | 10.34 |            | 71.62 | 6.01 | 10.44 |            |
| 135 | 55.59 | 4.22 | 8.06  | 23.27 (Br) | 55.35 | 4.36 | 8.07  | 23.01 (Br) |
| 137 | 66.65 | 5.41 | 8.09  |            | 66.57 | 5.59 | 8.17  |            |
| 138 | 69.47 | 6.13 | 5.55  |            | 69.30 | 6.02 | 5.57  |            |
| 139 | 60.19 | 5.11 | 4.73  |            | 59.90 | 5.03 | 4.82  |            |
| 141 | 66.81 | 5.86 | 4.95  |            | 66.60 | 5.76 | 4.85  |            |
| 141 | 60.74 | 4.19 | 4.98  |            | 60.79 | 4.22 | 4.89  |            |
| 143 | 44.92 | 3.16 | 6.76  |            | 44.84 | 3.26 | 6.97  |            |
| 144 | 41.53 | 2.64 | 9.38  |            | 41.15 | 2.53 | 9.60  |            |
| 145 | 41.16 | 2.64 | 9.26  |            | 41.15 | 2.53 | 9.60  |            |
| 146 | 71.55 | 6.90 | 5.06  |            | 71.56 | 6.71 | 4.91  |            |
| 147 | 56.37 | 5.15 | 3.98  |            | 56.06 | 4.98 | 3.85  |            |



|            |       |      |       |            |       |      |       |            |
|------------|-------|------|-------|------------|-------|------|-------|------------|
| <b>149</b> | 66.80 | 6.23 | 3.85  |            | 66.76 | 6.16 | 3.89  |            |
| <b>150</b> | 57.61 | 3.65 | 3.91  |            | 57.40 | 3.68 | 3.94  |            |
| <b>151</b> | 50.94 | 2.89 | 6.73  |            | 50.95 | 3.02 | 6.99  |            |
| <b>152</b> | 68.03 | 6.37 | 4.57  |            | 67.76 | 6.36 | 4.65  |            |
| <b>153</b> | 53.88 | 4.75 | 3.69  | 21.16 (Br) | 53.70 | 4.77 | 3.69  | 21.01      |
| <b>155</b> | 64.18 | 6.01 | 3.61  | 9.20 (Cl)  | 63.91 | 5.90 | 3.73  | 9.43 (Cl)  |
| <b>156</b> | 54.98 | 3.73 | 3.67  |            | 54.93 | 3.52 | 3.77  |            |
| <b>157</b> | 49.60 | 3.06 | 6.49  |            | 49.27 | 3.22 | 6.39  |            |
| <b>158</b> | 49.26 | 2.73 | 6.59  |            | 49.00 | 2.90 | 6.73  |            |
| <b>160</b> | 59.47 | 4.25 | 10.51 |            | 59.44 | 4.22 | 10.67 |            |
| <b>161</b> | 50.86 | 3.20 | 13.39 | 11.83 (Cl) | 50.74 | 3.28 | 13.66 | 11.52 (Cl) |
| <b>162</b> | 50.67 | 3.56 | 13.86 | 11.62 (Cl) | 50.74 | 3.28 | 13.66 | 11.52 (Cl) |

**2D NMR Spectra of 105, 162, 161, 97, 59 (EWG = 6-COMe), 92, 119, 144**

NMR data were collected on a Bruker Avance 400 spectrometer operating at frequencies of 400.13 MHz ( $^1\text{H}$ ) and 100.62 MHz ( $^{13}\text{C}$ ) and equipped with a 5mm triple-resonance ( $^1\text{H}/^{13}\text{C}/^{15}\text{N}$ ) inverse detection probe with a self-shielded z-gradient coil for 2D experiments ( $90^\circ$  pulse width 7.6/15.8/40  $\mu\text{s}$ ). A 5mm  $^1\text{H}/^{13}\text{C}$  dual probe ( $90^\circ$  pulse width 12.0/7.56  $\mu\text{s}$ ) was used to observe standard 1D spectra, which were obtained in  $(\text{CD}_3)_2\text{SO}$  at 300 K, and referenced to  $\text{Me}_4\text{Si}$ . Typical experimental parameters for one-dimensional  $^1\text{H}/^{13}\text{C}$  spectra were as follows: spectral width 17/240 ppm, data points 32K/64K, spectral resolution 0.21/0.40 Hz, number of scans 32/2000, acquisition time 2.42/1.25 s, relaxation delay 0.1/0.75 s, flip angle  $30/50^\circ$ .

Assignments were determined using  $^1\text{H}$ - $^1\text{H}$  gs-COSY,  $^1\text{H}$ - $^1\text{H}$  ROESY,  $^1\text{H}$ - $^{13}\text{C}$  gs-HSQC and gs-HMBC two-dimensional experiments using standard pulse sequences from the Bruker pulse library. The pulse conditions are as follows:

$^1\text{H}$ - $^1\text{H}$  gs-COSY: Spectral width of 10ppm was used in both dimensions and the acquisition data size was 2048 points. One transient was acquired per increment, with a 1.5 s relaxation delay, for a total of 256 experiments.

$^1\text{H}$ - $^1\text{H}$  ROESY: Spectral width of 10 ppm was used in both dimensions and the acquisition data size was 2048 points. Eight transients were acquired per increment, with a 2 s relaxation delay, for a total of 256 experiments. Mixing time was 250ms.

$^1\text{H}$ - $^{13}\text{C}$  gs-HSQC and gs-HMBC: Spectral width of 10 ppm in  $F_2$  and 200 ppm (10-210 ppm) in  $F_1$  was used and the HSQC/HMBC experiments optimized for C-H coupling of 140/8.3 Hz. Typically, acquisition data size was 2048 points and the number of increments for time evolution was 256. The number of scans per increment was 2/4 with 0.5/1 s delays between transients. Gradient ratios were 40:10 and 50:30:40% for the  $^1\text{H}$ - $^{13}\text{C}$  gs-HSQC and gs-HMBC experiments respectively.

The following compounds were analysed by 2D NMR experiments (COSY, ROESY, HSQC, HMBC) in  $d_6$ -DMSO solution. The deduced assignments and key interactions are shown below:

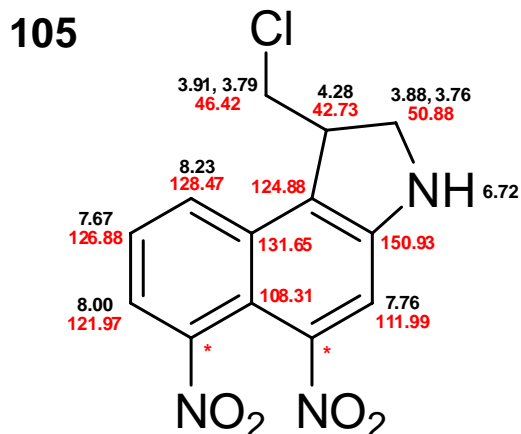

NOEs observed between:  
6.72 and 7.76  
8.23 and aliphatic protons,  
confirming 5,6-diNO<sub>2</sub>  
substitution pattern.

\* Two signals at  $\delta$   
145.92 and 145.84  
could not be assigned.

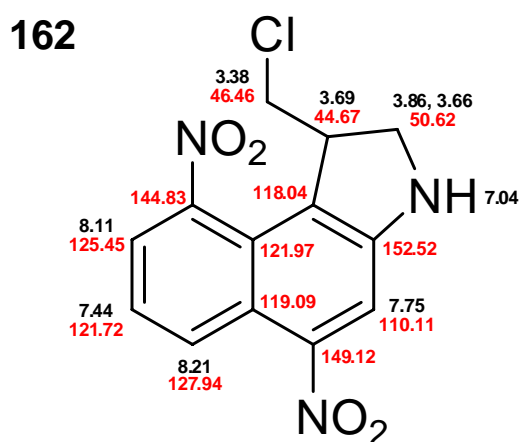

NOE observed between:  
7.75 and 7.04  
but none from aromatic to  
aliphatic protons,  
HMBC link from:  
7.75 to 149.12  
8.21 to 149.12  
confirming 5,9-diNO<sub>2</sub>  
substitution pattern.

161

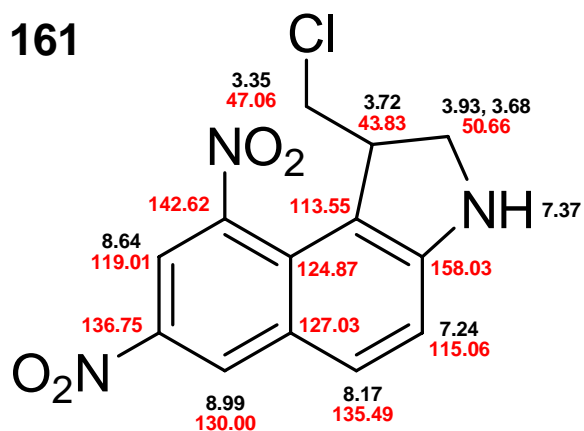

HMBC links:

consistent with 7,9-diNO<sub>2</sub> substitution pattern.

(NOESY experiment not performed)

97

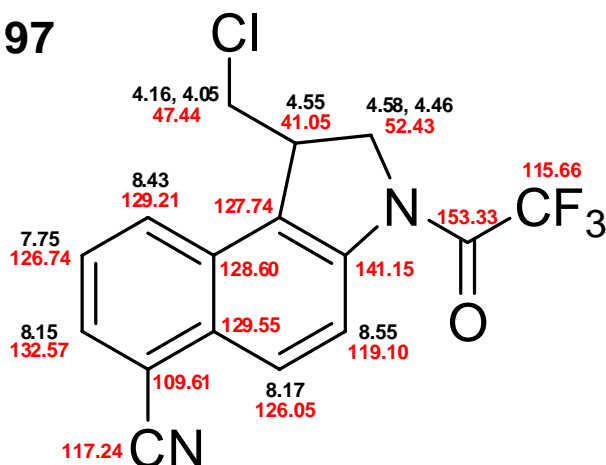

NOE observed between:

8.43 and aliphatic protons, confirming 6- and not 9-CN substitution pattern.

59 (EWG = 6-COMe)

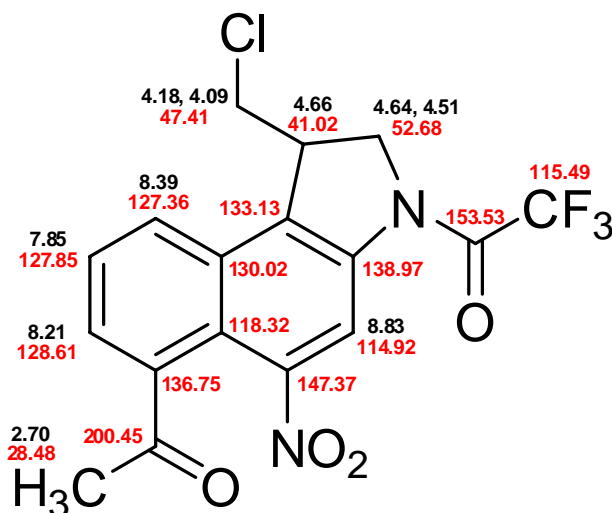

NOE observed between:

8.39 and aliphatic protons, confirming 6- and not 9-COMe,

HMBC link from:

8.83 only to 147.37, 138.97, 118.32, and 133.13, confirms 5-NO<sub>2</sub> substitution pattern.

92

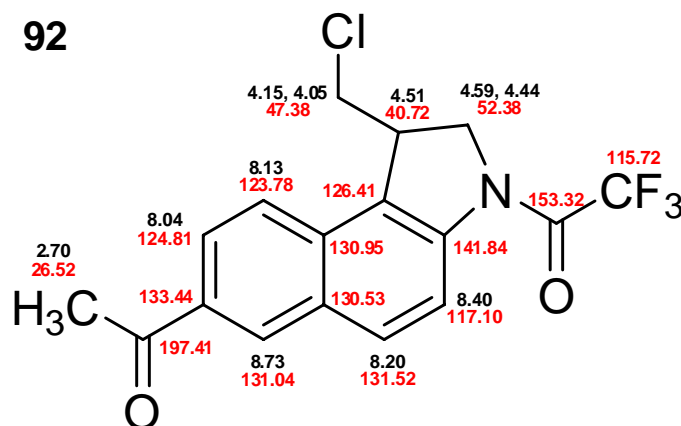

NOE observed between:  
8.13 and aliphatic protons  
8.73 and 8.20,  
confirms 7-COMe substitution.

119

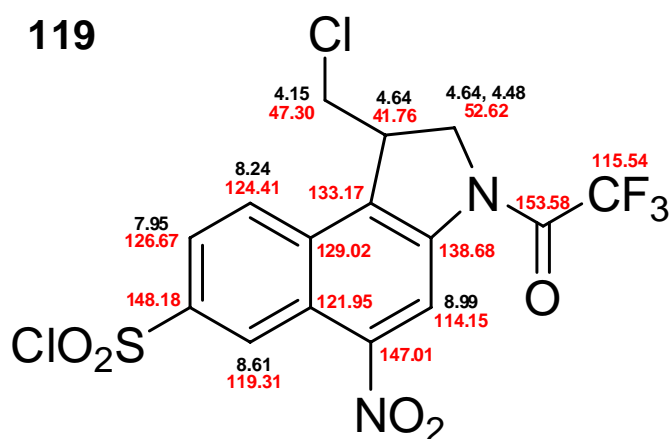

NOE observed between:  
8.24 and aliphatic protons,  
HMBC link from:  
8.99 only to 147.01, 138.68,  
133.17, and 121.95,  
confirms 5-NO<sub>2</sub>, 7-SO<sub>2</sub>Cl  
substitution pattern.

144

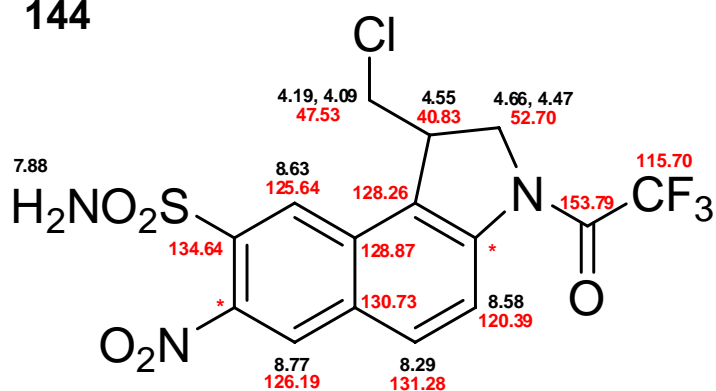

NOE observed between:  
8.63 and aliphatic protons  
8.63 and 7.88  
8.77 and 8.29,  
confirming 7,8-substitution  
pattern.

\* Two signals at  $\delta$   
143.58 and 143.53  
could not be assigned.

### X-ray Crystallographic Data for 133 and 105

Note: **133** is numbered as **60** (EWG = 8-SO<sub>2</sub>Me) in the accompanying paper.

**133** was crystallized from CH<sub>2</sub>Cl<sub>2</sub>/*i*-Pr<sub>2</sub>O followed by EtOAc and **105** was crystallized from benzene.

Intensity data ( $\lambda_{Mo} = 0.71073 \text{ \AA}$ ) were collected on a Seimens SMART diffractometer. Absorption corrections were applied to the raw intensity data using the SADABS program.<sup>8,9</sup> Structures were solved by direct methods using WINGX<sup>10</sup> with SHELXS-97.<sup>9</sup> Structures were refined using SHELXL-97.<sup>9</sup> The crystal data and structural refinement details are given in the tables below. Figures were created using The Cambridge Crystallographic Database Mercury visualization software.<sup>11</sup>

#### Crystal data and structure refinement for 133.

|                                   |                                             |                             |
|-----------------------------------|---------------------------------------------|-----------------------------|
| Empirical formula                 | C14 H13 Cl N2 O4 S                          |                             |
| Formula weight                    | 340.77                                      |                             |
| Temperature                       | 203(2) K                                    |                             |
| Wavelength                        | 0.71073 Å                                   |                             |
| Crystal system                    | Monoclinic                                  |                             |
| Space group                       | P21/c                                       |                             |
| Unit cell dimensions              | a = 8.428 Å                                 | $\alpha = 90^\circ$ .       |
|                                   | b = 14.8189(3) Å                            | $\beta = 97.472(1)^\circ$ . |
|                                   | c = 11.3830(2) Å                            | $\gamma = 90^\circ$ .       |
| Volume                            | 1409.56(4) Å <sup>3</sup>                   |                             |
| Z                                 | 4                                           |                             |
| Density (calculated)              | 1.606 Mg/m <sup>3</sup>                     |                             |
| Absorption coefficient            | 0.439 mm <sup>-1</sup>                      |                             |
| F(000)                            | 704                                         |                             |
| Crystal size                      | 0.42 x 0.38 x 0.36 mm <sup>3</sup>          |                             |
| Theta range for data collection   | 2.27 to 25.40°.                             |                             |
| Index ranges                      | -7 ≤ h ≤ 10, -13 ≤ k ≤ 17, -13 ≤ l ≤ 13     |                             |
| Reflections collected             | 7607                                        |                             |
| Independent reflections           | 2578 [R(int) = 0.0183]                      |                             |
| Completeness to theta = 25.40°    | 99.5 %                                      |                             |
| Absorption correction             | Semi-empirical from equivalents             |                             |
| Max. and min. transmission        | 0.883036 and 0.818036                       |                             |
| Refinement method                 | Full-matrix least-squares on F <sup>2</sup> |                             |
| Data / restraints / parameters    | 2578 / 0 / 200                              |                             |
| Goodness-of-fit on F <sup>2</sup> | 1.061                                       |                             |
| Final R indices [I > 2σ(I)]       | R1 = 0.0290, wR2 = 0.0809                   |                             |
| R indices (all data)              | R1 = 0.0322, wR2 = 0.0825                   |                             |
| Extinction coefficient            | 0.0076(14)                                  |                             |
| Largest diff. peak and hole       | 0.476 and -0.516 e.Å <sup>-3</sup>          |                             |

**Atomic coordinates (  $\times 10^4$  ) and equivalent isotropic displacement parameters ( $\text{\AA}^2 \times 10^3$ ) for 133.** U(eq) is defined as one third of the trace of the orthogonalized  $U^{ij}$  tensor.

|       | x        | y        | z        | U(eq) |
|-------|----------|----------|----------|-------|
| C(1)  | 1956(2)  | -2019(1) | 10906(1) | 22(1) |
| C(2)  | 1100(2)  | -2695(1) | 11658(2) | 29(1) |
| C(3)  | -754(2)  | -2201(1) | 10118(1) | 21(1) |
| C(4)  | -2205(2) | -2053(1) | 9387(1)  | 22(1) |
| C(5)  | -2251(2) | -1389(1) | 8550(1)  | 19(1) |
| C(6)  | -998(2)  | -85(1)   | 7586(2)  | 23(1) |
| C(7)  | 324(2)   | 422(1)   | 7477(2)  | 25(1) |
| C(8)  | 1788(2)  | 219(1)   | 8187(1)  | 21(1) |
| C(9)  | 1904(2)  | -441(1)  | 9030(1)  | 19(1) |
| C(10) | 535(2)   | -980(1)  | 9174(1)  | 18(1) |
| C(11) | -934(2)  | -812(1)  | 8405(1)  | 19(1) |
| C(12) | 584(2)   | -1679(1) | 10015(1) | 19(1) |
| C(13) | 3333(2)  | -2443(1) | 10360(2) | 25(1) |
| C(14) | 3661(2)  | 529(1)   | 6412(2)  | 34(1) |
| S(1)  | 3501(1)  | 832(1)   | 7893(1)  | 23(1) |
| Cl(1) | 2686(1)  | -3415(1) | 9469(1)  | 39(1) |
| O(1)  | -5006(1) | -1529(1) | 8089(1)  | 31(1) |
| O(2)  | -3655(1) | -1150(1) | 6676(1)  | 28(1) |
| O(3)  | 4890(2)  | 507(1)   | 8641(1)  | 35(1) |
| O(4)  | 3142(2)  | 1783(1)  | 7917(1)  | 32(1) |
| N(1)  | -452(2)  | -2876(1) | 10943(1) | 28(1) |
| N(2)  | -3741(2) | -1340(1) | 7723(1)  | 22(1) |

**Bond lengths [Å] and angles [°] for 133.**


---

|                  |            |
|------------------|------------|
| C(1)-C(13)       | 1.521(2)   |
| C(1)-C(12)       | 1.521(2)   |
| C(1)-C(2)        | 1.555(2)   |
| C(1)-H(1)        | 0.9800     |
| C(2)-N(1)        | 1.472(2)   |
| C(2)-H(2)        | 0.9700     |
| C(2)-H(3)        | 0.9700     |
| C(3)-N(1)        | 1.372(2)   |
| C(3)-C(12)       | 1.384(2)   |
| C(3)-C(4)        | 1.405(2)   |
| C(4)-C(5)        | 1.367(2)   |
| C(4)-H(4)        | 0.9300     |
| C(5)-C(11)       | 1.427(2)   |
| C(5)-N(2)        | 1.470(2)   |
| C(6)-C(7)        | 1.363(2)   |
| C(6)-C(11)       | 1.421(2)   |
| C(6)-H(5)        | 0.9300     |
| C(7)-C(8)        | 1.416(2)   |
| C(7)-H(6)        | 0.9300     |
| C(8)-C(9)        | 1.366(2)   |
| C(8)-S(1)        | 1.7736(16) |
| C(9)-C(10)       | 1.430(2)   |
| C(9)-H(7)        | 0.9300     |
| C(10)-C(12)      | 1.408(2)   |
| C(10)-C(11)      | 1.441(2)   |
| C(13)-Cl(1)      | 1.8048(18) |
| C(13)-H(8)       | 0.9700     |
| C(13)-H(9)       | 0.9700     |
| C(14)-S(1)       | 1.7669(19) |
| C(14)-H(10)      | 0.9600     |
| C(14)-H(11)      | 0.9600     |
| C(14)-H(12)      | 0.9600     |
| S(1)-O(3)        | 1.4383(13) |
| S(1)-O(4)        | 1.4417(13) |
| O(1)-N(2)        | 1.2271(18) |
| O(2)-N(2)        | 1.2360(19) |
| N(1)-H(13)       | 0.8600     |
|                  |            |
| C(13)-C(1)-C(12) | 114.77(13) |
| C(13)-C(1)-C(2)  | 113.09(14) |
| C(12)-C(1)-C(2)  | 102.31(13) |
| C(13)-C(1)-H(1)  | 108.8      |
| C(12)-C(1)-H(1)  | 108.8      |
| C(2)-C(1)-H(1)   | 108.8      |
| N(1)-C(2)-C(1)   | 104.77(13) |
| N(1)-C(2)-H(2)   | 110.8      |
| C(1)-C(2)-H(2)   | 110.8      |
| N(1)-C(2)-H(3)   | 110.8      |
| C(1)-C(2)-H(3)   | 110.8      |
| H(2)-C(2)-H(3)   | 108.9      |
| N(1)-C(3)-C(12)  | 112.59(14) |
| N(1)-C(3)-C(4)   | 126.11(15) |
| C(12)-C(3)-C(4)  | 121.21(15) |
| C(5)-C(4)-C(3)   | 118.01(15) |
| C(5)-C(4)-H(4)   | 121.0      |
| C(3)-C(4)-H(4)   | 121.0      |
| C(4)-C(5)-C(11)  | 124.02(15) |
| C(4)-C(5)-N(2)   | 115.24(14) |



|                   |            |
|-------------------|------------|
| C(11)-C(5)-N(2)   | 120.59(14) |
| C(7)-C(6)-C(11)   | 121.02(15) |
| C(7)-C(6)-H(5)    | 119.5      |
| C(11)-C(6)-H(5)   | 119.5      |
| C(6)-C(7)-C(8)    | 119.57(15) |
| C(6)-C(7)-H(6)    | 120.2      |
| C(8)-C(7)-H(6)    | 120.2      |
| C(9)-C(8)-C(7)    | 122.00(15) |
| C(9)-C(8)-S(1)    | 120.94(13) |
| C(7)-C(8)-S(1)    | 117.01(12) |
| C(8)-C(9)-C(10)   | 119.72(15) |
| C(8)-C(9)-H(7)    | 120.1      |
| C(10)-C(9)-H(7)   | 120.1      |
| C(12)-C(10)-C(9)  | 122.40(14) |
| C(12)-C(10)-C(11) | 119.15(14) |
| C(9)-C(10)-C(11)  | 118.43(14) |
| C(6)-C(11)-C(5)   | 124.43(15) |
| C(6)-C(11)-C(10)  | 119.07(14) |
| C(5)-C(11)-C(10)  | 116.47(14) |
| C(3)-C(12)-C(10)  | 121.09(15) |
| C(3)-C(12)-C(1)   | 108.38(14) |
| C(10)-C(12)-C(1)  | 130.51(14) |
| C(1)-C(13)-Cl(1)  | 111.62(11) |
| C(1)-C(13)-H(8)   | 109.3      |
| Cl(1)-C(13)-H(8)  | 109.3      |
| C(1)-C(13)-H(9)   | 109.3      |
| Cl(1)-C(13)-H(9)  | 109.3      |
| H(8)-C(13)-H(9)   | 108.0      |
| S(1)-C(14)-H(10)  | 109.5      |
| S(1)-C(14)-H(11)  | 109.5      |
| H(10)-C(14)-H(11) | 109.5      |
| S(1)-C(14)-H(12)  | 109.5      |
| H(10)-C(14)-H(12) | 109.5      |
| H(11)-C(14)-H(12) | 109.5      |
| O(3)-S(1)-O(4)    | 118.24(8)  |
| O(3)-S(1)-C(14)   | 108.80(9)  |
| O(4)-S(1)-C(14)   | 107.98(9)  |
| O(3)-S(1)-C(8)    | 109.66(8)  |
| O(4)-S(1)-C(8)    | 108.59(8)  |
| C(14)-S(1)-C(8)   | 102.40(8)  |
| C(3)-N(1)-C(2)    | 108.57(13) |
| C(3)-N(1)-H(13)   | 125.7      |
| C(2)-N(1)-H(13)   | 125.7      |
| O(1)-N(2)-O(2)    | 122.82(14) |
| O(1)-N(2)-C(5)    | 118.63(14) |
| O(2)-N(2)-C(5)    | 118.46(13) |

---

**Anisotropic displacement parameters ( $\text{\AA}^2 \times 10^3$ ) for 133.** The anisotropic displacement factor exponent takes the form:  $-2\pi^2 [h^2 a^{*2} U^{11} + \dots + 2 h k a^* b^* U^{12}]$

|       | U <sup>11</sup> | U <sup>22</sup> | U <sup>33</sup> | U <sup>23</sup> | U <sup>13</sup> | U <sup>12</sup> |
|-------|-----------------|-----------------|-----------------|-----------------|-----------------|-----------------|
| C(1)  | 23(1)           | 23(1)           | 18(1)           | 2(1)            | 1(1)            | -1(1)           |
| C(2)  | 29(1)           | 35(1)           | 22(1)           | 7(1)            | 3(1)            | -1(1)           |
| C(3)  | 23(1)           | 22(1)           | 21(1)           | 0(1)            | 7(1)            | 1(1)            |
| C(4)  | 18(1)           | 24(1)           | 25(1)           | -2(1)           | 7(1)            | -3(1)           |
| C(5)  | 16(1)           | 22(1)           | 20(1)           | -5(1)           | 3(1)            | 1(1)            |
| C(6)  | 18(1)           | 24(1)           | 26(1)           | 3(1)            | -2(1)           | 2(1)            |
| C(7)  | 24(1)           | 22(1)           | 28(1)           | 7(1)            | 0(1)            | 1(1)            |
| C(8)  | 18(1)           | 19(1)           | 26(1)           | 0(1)            | 2(1)            | -3(1)           |
| C(9)  | 18(1)           | 19(1)           | 21(1)           | -2(1)           | 1(1)            | 0(1)            |
| C(10) | 18(1)           | 18(1)           | 17(1)           | -3(1)           | 3(1)            | 1(1)            |
| C(11) | 17(1)           | 18(1)           | 20(1)           | -3(1)           | 4(1)            | 2(1)            |
| C(12) | 19(1)           | 21(1)           | 18(1)           | -2(1)           | 4(1)            | 1(1)            |
| C(13) | 21(1)           | 27(1)           | 27(1)           | 3(1)            | 0(1)            | 1(1)            |
| C(14) | 32(1)           | 37(1)           | 34(1)           | 2(1)            | 11(1)           | -2(1)           |
| S(1)  | 20(1)           | 21(1)           | 28(1)           | 4(1)            | 2(1)            | -5(1)           |
| Cl(1) | 35(1)           | 39(1)           | 40(1)           | -13(1)          | -2(1)           | 10(1)           |
| O(1)  | 16(1)           | 42(1)           | 38(1)           | -1(1)           | 6(1)            | -2(1)           |
| O(2)  | 26(1)           | 35(1)           | 23(1)           | 1(1)            | -2(1)           | -3(1)           |
| O(3)  | 22(1)           | 36(1)           | 44(1)           | 11(1)           | -5(1)           | -7(1)           |
| O(4)  | 36(1)           | 21(1)           | 39(1)           | 3(1)            | 7(1)            | -5(1)           |
| N(1)  | 24(1)           | 31(1)           | 31(1)           | 12(1)           | 5(1)            | -5(1)           |
| N(2)  | 17(1)           | 21(1)           | 28(1)           | -3(1)           | 2(1)            | -1(1)           |

**Hydrogen coordinates ( $\times 10^4$ ) and isotropic displacement parameters ( $\text{\AA}^2 \times 10^3$ ) for 133.**

|       | x     | y     | z     | U(eq) |
|-------|-------|-------|-------|-------|
| H(1)  | 2371  | -1515 | 11413 | 26    |
| H(2)  | 1716  | -3247 | 11796 | 35    |
| H(3)  | 949   | -2432 | 12416 | 35    |
| H(4)  | -3107 | -2396 | 9469  | 26    |
| H(5)  | -1958 | 47    | 7118  | 28    |
| H(6)  | 265   | 898   | 6941  | 30    |
| H(7)  | 2868  | -540  | 9510  | 23    |
| H(8)  | 4165  | -2623 | 10986 | 30    |
| H(9)  | 3783  | -1999 | 9871  | 30    |
| H(10) | 2738  | 742   | 5905  | 50    |
| H(11) | 3726  | -116  | 6352  | 50    |
| H(12) | 4607  | 796   | 6175  | 50    |
| H(13) | -1066 | -3328 | 11027 | 34    |

**Structure of 133** showing 50% probability displacement ellipsoids for non-hydrogen atoms and hydrogen atoms as arbitrary spheres.

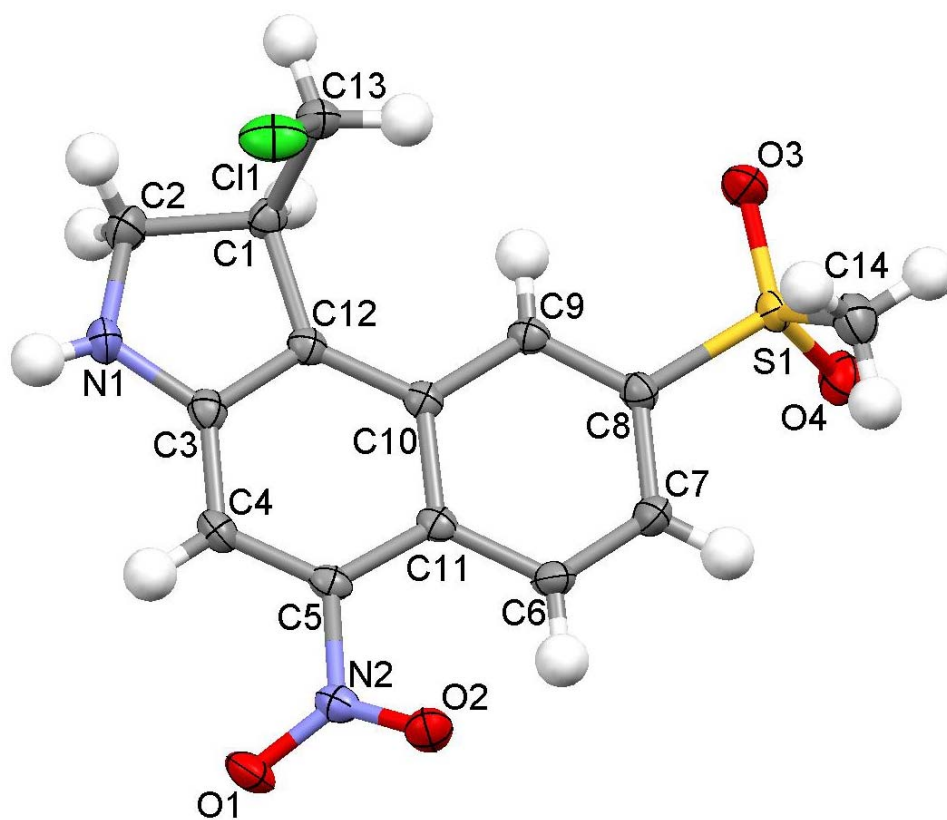

**Crystal data and structure refinement for 105.**

|                                   |                                                                                                                                     |
|-----------------------------------|-------------------------------------------------------------------------------------------------------------------------------------|
| Empirical formula                 | C13 H10 Cl N3 O4                                                                                                                    |
| Formula weight                    | 307.69                                                                                                                              |
| Temperature                       | 87(2) K                                                                                                                             |
| Wavelength                        | 0.71073 Å                                                                                                                           |
| Crystal system                    | Monoclinic                                                                                                                          |
| Space group                       | C2/c                                                                                                                                |
| Unit cell dimensions              | a = 16.7427(4) Å $\alpha = 90^\circ$ .<br>b = 8.8730(2) Å $\beta = 93.8820(10)^\circ$ .<br>c = 17.28940(10) Å $\gamma = 90^\circ$ . |
| Volume                            | 2562.59(9) Å <sup>3</sup>                                                                                                           |
| Z                                 | 8                                                                                                                                   |
| Density (calculated)              | 1.595 Mg/m <sup>3</sup>                                                                                                             |
| Absorption coefficient            | 0.319 mm <sup>-1</sup>                                                                                                              |
| F(000)                            | 1264                                                                                                                                |
| Crystal size                      | 0.36 x 0.22 x 0.1 mm <sup>3</sup>                                                                                                   |
| Theta range for data collection   | 2.36 to 26.38°.                                                                                                                     |
| Index ranges                      | -20 ≤ h ≤ 14, -10 ≤ k ≤ 11, -21 ≤ l ≤ 21                                                                                            |
| Reflections collected             | 7407                                                                                                                                |
| Independent reflections           | 2602 [R(int) = 0.0416]                                                                                                              |
| Completeness to theta = 26.38°    | 99.5 %                                                                                                                              |
| Absorption correction             | Semi-empirical from equivalents                                                                                                     |
| Max. and min. transmission        | 0.9488 and 0.6825                                                                                                                   |
| Refinement method                 | Full-matrix least-squares on F <sup>2</sup>                                                                                         |
| Data / restraints / parameters    | 2602 / 0 / 194                                                                                                                      |
| Goodness-of-fit on F <sup>2</sup> | 1.070                                                                                                                               |
| Final R indices [I > 2sigma(I)]   | R1 = 0.0416, wR2 = 0.0988                                                                                                           |
| R indices (all data)              | R1 = 0.0569, wR2 = 0.1074                                                                                                           |
| Largest diff. peak and hole       | 0.349 and -0.401 e.Å <sup>-3</sup>                                                                                                  |

**Atomic coordinates (  $\times 10^4$ ) and equivalent isotropic displacement parameters (Å<sup>2</sup> $\times 10^3$ ) for 105.** U(eq) is defined as one third of the trace of the orthogonalized  $U^{ij}$  tensor.

|       | x       | y        | z       | U(eq) |
|-------|---------|----------|---------|-------|
| Cl(1) | 9577(1) | 6950(1)  | 3379(1) | 31(1) |
| O(2)  | 9224(1) | 123(2)   | 6898(1) | 25(1) |
| O(4)  | 9144(1) | -2062(2) | 5373(1) | 31(1) |
| O(3)  | 8078(1) | -1238(2) | 5892(1) | 30(1) |
| O(1)  | 8123(1) | 556(2)   | 7455(1) | 34(1) |
| N(3)  | 9302(1) | 2062(2)  | 3302(1) | 25(1) |
| N(2)  | 8677(1) | -1052(2) | 5518(1) | 25(1) |
| N(1)  | 8578(1) | 779(2)   | 6940(1) | 23(1) |
| C(5)  | 8516(1) | 3138(2)  | 5117(1) | 17(1) |
| C(1)  | 8367(1) | 1950(2)  | 6360(1) | 19(1) |
| C(6)  | 8562(1) | 1784(2)  | 5575(1) | 18(1) |
| C(7)  | 8805(1) | 458(2)   | 5189(1) | 20(1) |
| C(11) | 8798(1) | 4362(2)  | 3767(1) | 19(1) |
| C(4)  | 8222(1) | 4488(2)  | 5440(1) | 18(1) |
| C(2)  | 8079(1) | 3256(2)  | 6656(1) | 21(1) |
| C(3)  | 7991(1) | 4544(2)  | 6183(1) | 21(1) |
| C(10) | 8756(1) | 3095(2)  | 4353(1) | 18(1) |
| C(8)  | 9069(1) | 444(2)   | 4453(1) | 23(1) |
| C(9)  | 9057(1) | 1803(2)  | 4036(1) | 20(1) |
| C(12) | 8926(1) | 3473(2)  | 3016(1) | 23(1) |
| C(13) | 9516(1) | 5355(2)  | 4013(1) | 22(1) |

**Bond lengths [Å] and angles [°] for 105.**


---

|                   |            |
|-------------------|------------|
| Cl(1)-C(13)       | 1.797(2)   |
| O(2)-N(1)         | 1.234(2)   |
| O(4)-N(2)         | 1.227(2)   |
| O(3)-N(2)         | 1.240(2)   |
| O(1)-N(1)         | 1.227(2)   |
| N(3)-C(9)         | 1.380(3)   |
| N(3)-C(12)        | 1.471(3)   |
| N(3)-HN1          | 0.83(3)    |
| N(2)-C(7)         | 1.477(3)   |
| N(1)-C(1)         | 1.471(3)   |
| C(5)-C(10)        | 1.407(3)   |
| C(5)-C(4)         | 1.424(3)   |
| C(5)-C(6)         | 1.438(3)   |
| C(1)-C(2)         | 1.369(3)   |
| C(1)-C(6)         | 1.425(3)   |
| C(6)-C(7)         | 1.425(3)   |
| C(7)-C(8)         | 1.374(3)   |
| C(11)-C(10)       | 1.518(3)   |
| C(11)-C(13)       | 1.527(3)   |
| C(11)-C(12)       | 1.547(3)   |
| C(11)-H(11)       | 0.9800     |
| C(4)-C(3)         | 1.367(3)   |
| C(4)-H(4)         | 0.9300     |
| C(2)-C(3)         | 1.407(3)   |
| C(2)-H(2)         | 0.9300     |
| C(3)-H(3)         | 0.9300     |
| C(10)-C(9)        | 1.381(3)   |
| C(8)-C(9)         | 1.405(3)   |
| C(8)-H(8)         | 0.9300     |
| C(12)-H(12A)      | 0.9700     |
| C(12)-H(12B)      | 0.9700     |
| C(13)-H(13A)      | 0.9700     |
| C(13)-H(13B)      | 0.9700     |
|                   |            |
| C(9)-N(3)-C(12)   | 107.68(17) |
| C(9)-N(3)-HN1     | 119.8(18)  |
| C(12)-N(3)-HN1    | 119.3(17)  |
| O(4)-N(2)-O(3)    | 123.99(18) |
| O(4)-N(2)-C(7)    | 118.20(18) |
| O(3)-N(2)-C(7)    | 117.71(17) |
| O(1)-N(1)-O(2)    | 123.78(17) |
| O(1)-N(1)-C(1)    | 118.48(17) |
| O(2)-N(1)-C(1)    | 117.66(16) |
| C(10)-C(5)-C(4)   | 121.31(18) |
| C(10)-C(5)-C(6)   | 119.10(17) |
| C(4)-C(5)-C(6)    | 119.59(17) |
| C(2)-C(1)-C(6)    | 123.65(18) |
| C(2)-C(1)-N(1)    | 114.65(17) |
| C(6)-C(1)-N(1)    | 121.11(18) |
| C(7)-C(6)-C(1)    | 128.45(18) |
| C(7)-C(6)-C(5)    | 116.03(17) |
| C(1)-C(6)-C(5)    | 115.52(17) |
| C(8)-C(7)-C(6)    | 124.05(18) |
| C(8)-C(7)-N(2)    | 114.36(18) |
| C(6)-C(7)-N(2)    | 121.02(18) |
| C(10)-C(11)-C(13) | 108.25(16) |
| C(10)-C(11)-C(12) | 101.41(16) |
| C(13)-C(11)-C(12) | 112.14(17) |

|                     |            |
|---------------------|------------|
| C(10)-C(11)-H(11)   | 111.5      |
| C(13)-C(11)-H(11)   | 111.5      |
| C(12)-C(11)-H(11)   | 111.5      |
| C(3)-C(4)-C(5)      | 121.81(18) |
| C(3)-C(4)-H(4)      | 119.1      |
| C(5)-C(4)-H(4)      | 119.1      |
| C(1)-C(2)-C(3)      | 119.70(18) |
| C(1)-C(2)-H(2)      | 120.1      |
| C(3)-C(2)-H(2)      | 120.1      |
| C(4)-C(3)-C(2)      | 119.43(19) |
| C(4)-C(3)-H(3)      | 120.3      |
| C(2)-C(3)-H(3)      | 120.3      |
| C(9)-C(10)-C(5)     | 122.01(18) |
| C(9)-C(10)-C(11)    | 108.36(17) |
| C(5)-C(10)-C(11)    | 129.49(18) |
| C(7)-C(8)-C(9)      | 118.30(19) |
| C(7)-C(8)-H(8)      | 120.9      |
| C(9)-C(8)-H(8)      | 120.9      |
| N(3)-C(9)-C(10)     | 111.48(18) |
| N(3)-C(9)-C(8)      | 128.42(19) |
| C(10)-C(9)-C(8)     | 120.08(18) |
| N(3)-C(12)-C(11)    | 103.44(16) |
| N(3)-C(12)-H(12A)   | 111.1      |
| C(11)-C(12)-H(12A)  | 111.1      |
| N(3)-C(12)-H(12B)   | 111.1      |
| C(11)-C(12)-H(12B)  | 111.1      |
| H(12A)-C(12)-H(12B) | 109.0      |
| C(11)-C(13)-Cl(1)   | 111.14(14) |
| C(11)-C(13)-H(13A)  | 109.4      |
| Cl(1)-C(13)-H(13A)  | 109.4      |
| C(11)-C(13)-H(13B)  | 109.4      |
| Cl(1)-C(13)-H(13B)  | 109.4      |
| H(13A)-C(13)-H(13B) | 108.0      |

---

**Anisotropic displacement parameters ( $\text{\AA}^2 \times 10^3$ ) for 105.** The anisotropic displacement factor exponent takes the form:  $-2\pi^2 [h^2 a^{*2} U^{11} + \dots + 2 h k a^* b^* U^{12}]$

|       | U <sup>11</sup> | U <sup>22</sup> | U <sup>33</sup> | U <sup>23</sup> | U <sup>13</sup> | U <sup>12</sup> |
|-------|-----------------|-----------------|-----------------|-----------------|-----------------|-----------------|
| Cl(1) | 41(1)           | 30(1)           | 22(1)           | 5(1)            | 4(1)            | -12(1)          |
| O(2)  | 21(1)           | 25(1)           | 29(1)           | 8(1)            | 1(1)            | 4(1)            |
| O(4)  | 34(1)           | 17(1)           | 40(1)           | -1(1)           | -1(1)           | 6(1)            |
| O(3)  | 25(1)           | 23(1)           | 43(1)           | 7(1)            | 2(1)            | -4(1)           |
| O(1)  | 33(1)           | 39(1)           | 32(1)           | 16(1)           | 16(1)           | 5(1)            |
| N(3)  | 31(1)           | 24(1)           | 20(1)           | -7(1)           | 4(1)            | 2(1)            |
| N(2)  | 24(1)           | 18(1)           | 31(1)           | 0(1)            | -4(1)           | -1(1)           |
| N(1)  | 23(1)           | 23(1)           | 24(1)           | 6(1)            | 4(1)            | 0(1)            |
| C(5)  | 14(1)           | 18(1)           | 19(1)           | -1(1)           | 0(1)            | -2(1)           |
| C(1)  | 16(1)           | 20(1)           | 21(1)           | 7(1)            | 1(1)            | 0(1)            |
| C(6)  | 14(1)           | 17(1)           | 22(1)           | 1(1)            | 1(1)            | -1(1)           |
| C(7)  | 19(1)           | 15(1)           | 26(1)           | 1(1)            | -2(1)           | -2(1)           |
| C(11) | 21(1)           | 20(1)           | 17(1)           | 0(1)            | 4(1)            | 0(1)            |
| C(4)  | 20(1)           | 16(1)           | 19(1)           | 1(1)            | 1(1)            | -1(1)           |
| C(2)  | 19(1)           | 26(1)           | 19(1)           | 1(1)            | 4(1)            | 1(1)            |
| C(3)  | 19(1)           | 22(1)           | 22(1)           | -2(1)           | 4(1)            | 2(1)            |
| C(10) | 17(1)           | 18(1)           | 18(1)           | -2(1)           | 0(1)            | -2(1)           |
| C(8)  | 20(1)           | 18(1)           | 29(1)           | -7(1)           | -1(1)           | 0(1)            |
| C(9)  | 17(1)           | 22(1)           | 21(1)           | -5(1)           | -1(1)           | 0(1)            |
| C(12) | 26(1)           | 25(1)           | 17(1)           | -2(1)           | 2(1)            | -1(1)           |
| C(13) | 26(1)           | 24(1)           | 17(1)           | 1(1)            | 3(1)            | -3(1)           |

**Hydrogen coordinates ( $\times 10^4$ ) and isotropic displacement parameters ( $\text{\AA}^2 \times 10^3$ ) for 105.**

|        | x        | y        | z        | U(eq) |
|--------|----------|----------|----------|-------|
| H(11)  | 8300     | 4946     | 3721     | 23    |
| H(4)   | 8185     | 5355     | 5138     | 22    |
| H(2)   | 7941     | 3292     | 7168     | 25    |
| H(3)   | 7778     | 5426     | 6375     | 25    |
| H(8)   | 9250     | -442     | 4237     | 27    |
| H(12A) | 8420     | 3276     | 2726     | 27    |
| H(12B) | 9274     | 4017     | 2687     | 27    |
| H(13A) | 10004    | 4766     | 4004     | 27    |
| H(13B) | 9469     | 5704     | 4539     | 27    |
| HN1    | 9341(15) | 1350(30) | 2998(15) | 30(7) |

**Structure of 105** showing 50% probability displacement ellipsoids for non-hydrogen atoms and hydrogen atoms as arbitrary spheres.

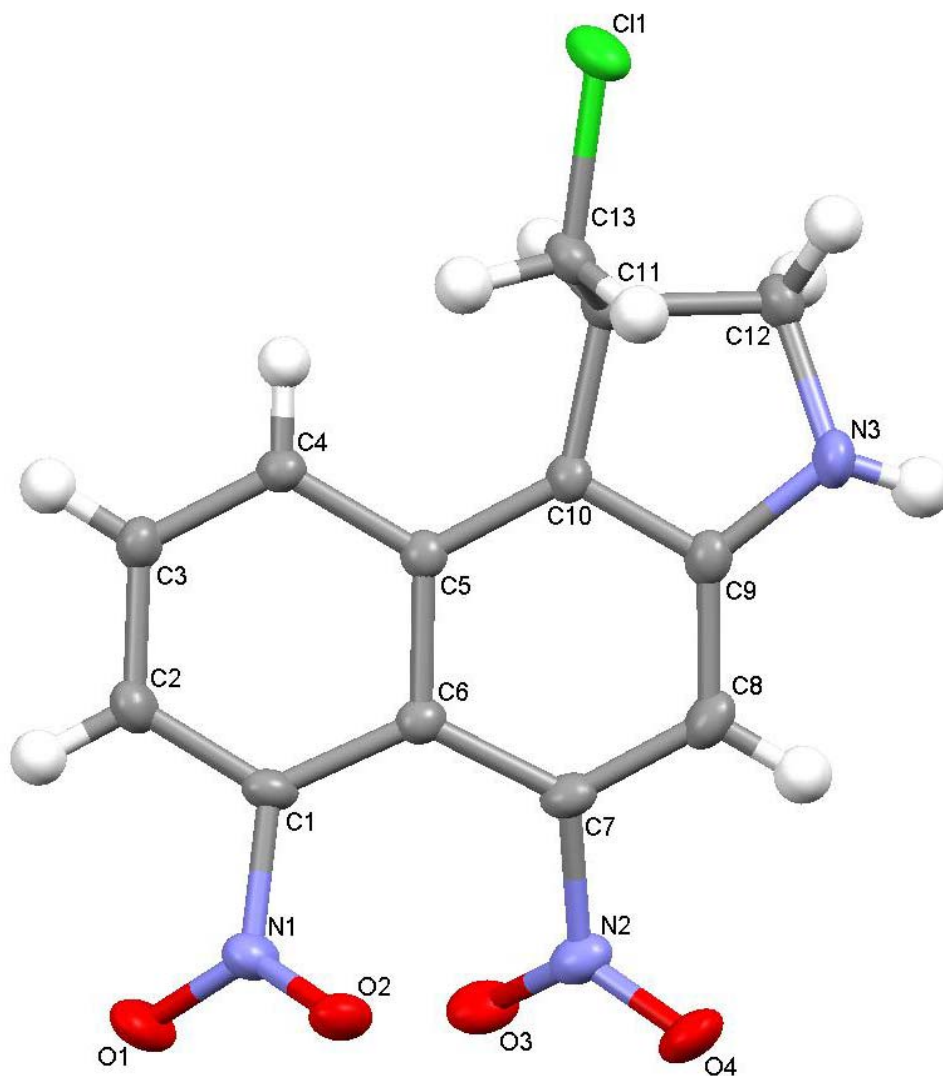



**Figure S1. Relationship between one-electron reduction potential [ $E(1)$ ] and cytotoxicity ( $IC_{50}$ ) for the nitroCBIs of Table 2.**

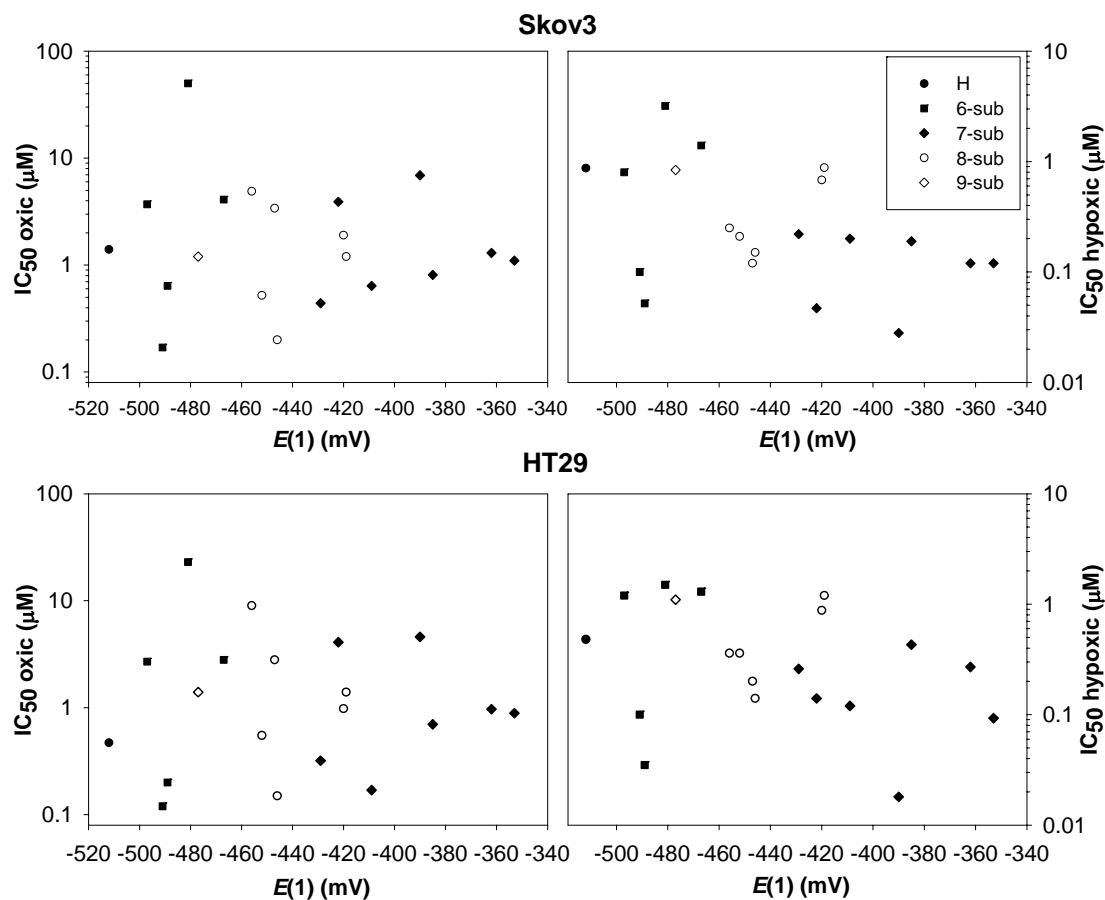

**Figure S2. Relationship between hypoxic cytotoxicity ratio (HCR) in HT29 and one-electron reduction potential [ $E(1)$ ] for the compounds of Table 2.** The A-ring substituents are divided into two groups: (●) 6,7,8-SO<sub>2</sub>NH<sub>2</sub> and 6,7,8-CONH<sub>2</sub> (linear regression gives  $r^2 = 0.75$ ), and (○) all other substituents (linear regression  $r^2 = 0.22$ ).

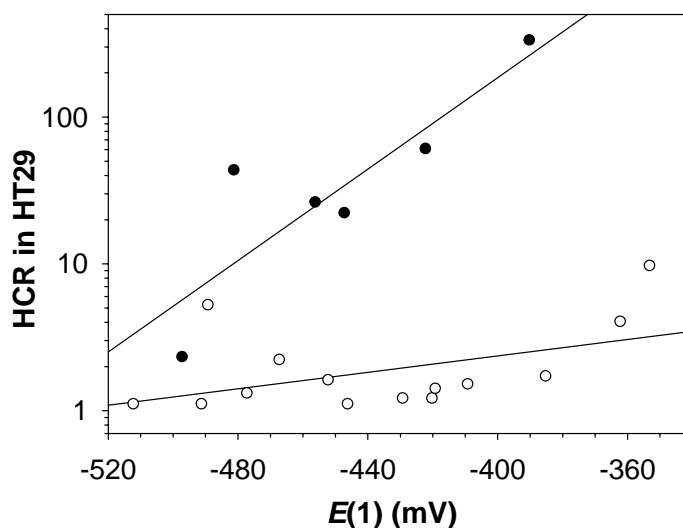

**Figure S3. Correlation between cytotoxicity in HT29 and Skov3.** Correlations are shown for the nitroCBIs of Tables 1 and 2 under oxic and hypoxic conditions, and for the aminoCBIs of Table 3 under hypoxic conditions.

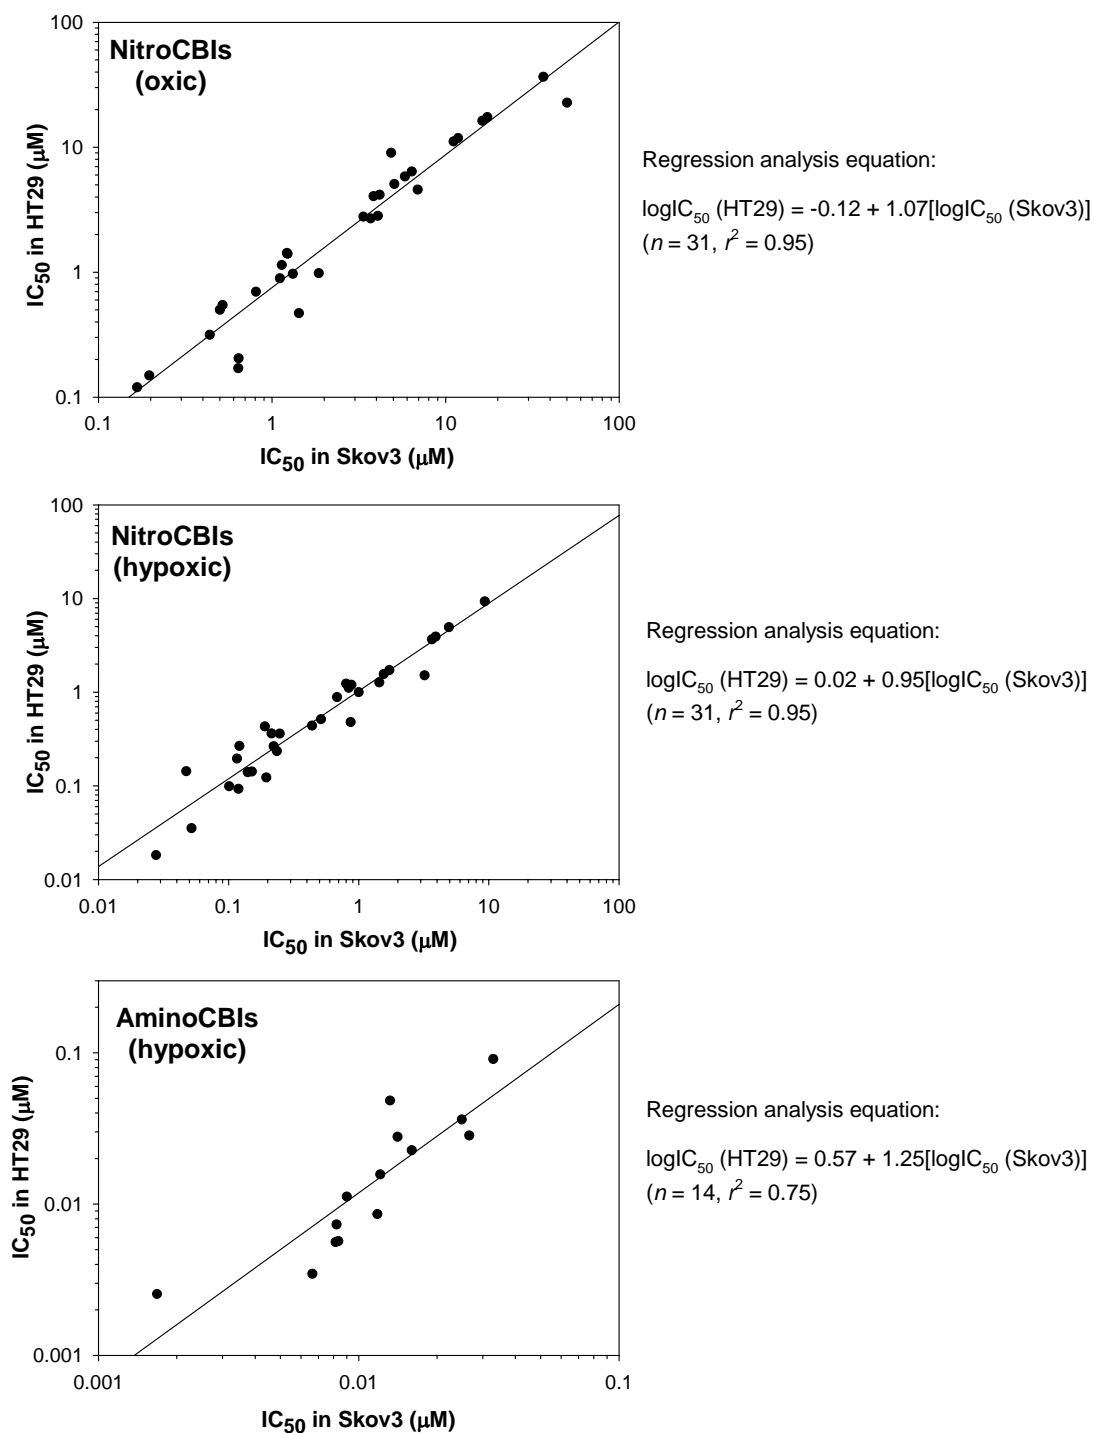

**Figure S4. Comparison of hypoxic cytotoxicity and hypoxic selectivity of 28, PR-104A (3), and tirapazamine (1) across a cell line panel.** Data for PR-104A and tirapazamine taken from ref<sup>12</sup>

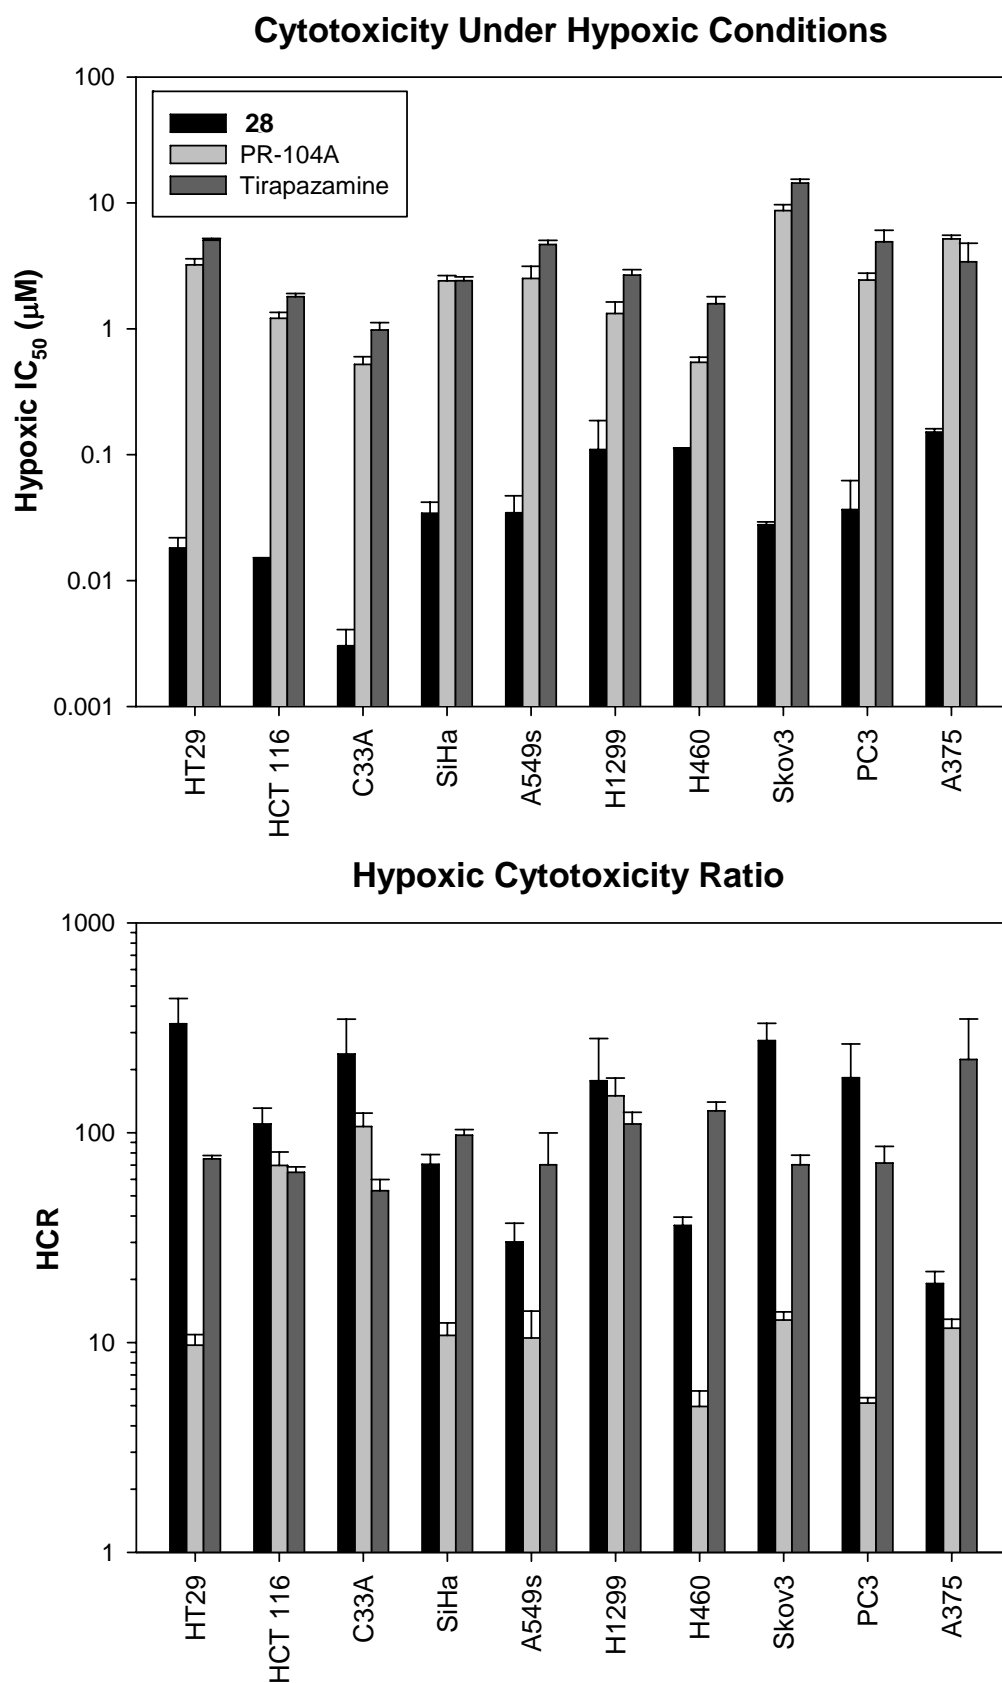

**Figure S5. MS and UV-visible spectroscopy characterisation of 28 and its major S9 metabolites under oxic and hypoxic incubation conditions.** The data shown correspond to the labelled peaks in the HPLC traces of Figure 8B,D. The compound labelled with an asterisk is tentatively identified as the N-oxide structure shown.

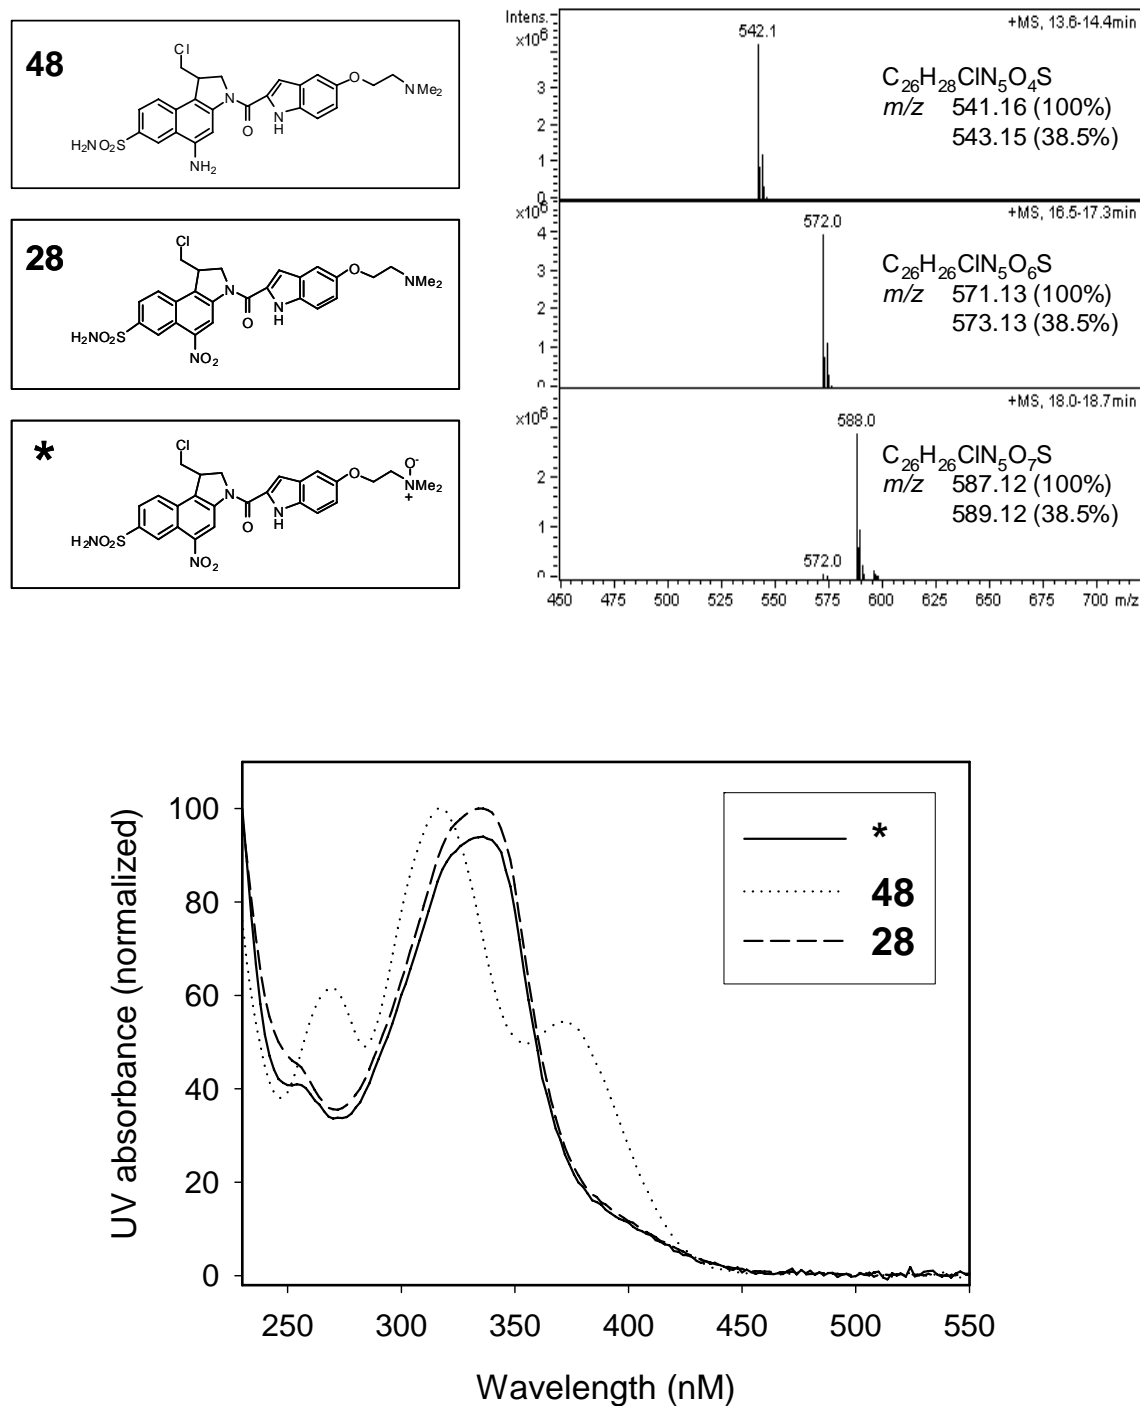

## References

- (1) Atwell, G. J.; Milbank, J. J.; Wilson, W. R.; Hogg, A.; Denny, W. A. 5-Amino-1-(chloromethyl)-1,2-dihydro-3H-benz[e]indoles: relationships between structure and cytotoxicity for analogues bearing different DNA minor groove binding subunits. *J. Med. Chem.* **1999**, *42*, 3400-3411.
- (2) Gao, Y.; Voigt, J.; Zhao, H.; Pais, G. C.; Zhang, X.; Wu, L.; Zhang, Z. Y.; Burke, T. R., Jr. Utilization of a peptide lead for the discovery of a novel PTP1B-binding motif. *J. Med. Chem.* **2001**, *44*, 2869-2878.
- (3) Wendt, M. D.; Rockway, T. W.; Geyer, A.; McClellan, W.; Weitzberg, M.; Zhao, X.; Mantei, R.; Nienaber, V. L.; Stewart, K.; Klinghofer, V.; Giranda, V. L. Identification of novel binding interactions in the development of potent, selective 2-naphthamidine inhibitors of urokinase. Synthesis, structural analysis, and SAR of N-phenyl amide 6-substitution. *J. Med. Chem.* **2004**, *47*, 303-324.
- (4) Adcock, W.; Wells, P. R. Substituent effects in naphthalene. I. Syntheses of 4, 5, 6, 7, and 8-substituted 2-naphthoic acids. *Aust. J. Chem.* **1965**, *18*, 1351-1364.
- (5) Katz, T. J.; Sudhakar, A.; Teasley, M. F.; Gilbert, A. M.; Geiger, W. E.; Robben, M. P.; Wuensch, M.; Ward, M. D. Synthesis and properties of optically active helical metallocene oligomers. *J. Am. Chem. Soc.* **1993**, *115*, 3182-3198.
- (6) Yuho, T.; Masami, S.; Takahiro, F.; Yasuhide, Y. The substituent effect. 14. The solvolysis of 6- and 7-substituted 1-(2-naphthyl)ethyl chlorides. *Bull. Chem. Soc. Japan* **1979**, *52*, 3033-3042.
- (7) Yao, Z. J.; Ye, B.; Wu, X. W.; Wang, S.; Wu, L.; Zhang, Z. Y.; Burke, T. R., Jr. Structure-based design and synthesis of small molecule protein-tyrosine phosphatase 1B inhibitors. *Bioorg. Med. Chem.* **1998**, *6*, 1799-1810.
- (8) Sheldrick, G. M. SADABS: Program for semi-empirical absorption correction, **1997**. Institut für Anorganische Chemie der Universität Göttingen, Germany.
- (9) Sheldrick, G. M. SHELX97 [Includes SHELXS97, SHELXL97, CIFTAB] - Programs for Crystal Structure Analysis, **1997**. Institut für Anorganische Chemie der Universität Göttingen, Germany.
- (10) Farrugia, L. J. WinGX suite for small-molecule single-crystal crystallography. *J. Appl. Crystallog.* **1999**, *32*, 837-838.
- (11) Bruno, I. J.; Cole, J. C.; Edgington, P. R.; Kessler, M.; Macrae, C. F.; McCabe, P.; Pearson, J.; Taylor, R. New software for searching the Cambridge Structural Database and visualizing crystal structures. *Acta Crystallog., Section B: Structural Science* **2002**, *B58*, 389-397.
- (12) Patterson, A. V.; Ferry, D. M.; Edmunds, S. J.; Gu, Y.; Singleton, R. S.; Patel, K.; Pullen, S. M.; Syddall, S. P.; Atwell, G. J.; Yang, S.; Denny, W. A.; Wilson, W. R. Mechanism of action and preclinical antitumor activity of the novel hypoxia-activated DNA crosslinking agent PR-104. *Clin. Cancer Res.* **2007**, *13*, 3922-3932.
